# Supplementary material for: Efficient Access to New Structures with Incorporated 1,2,3-Triazolium Salts as Preferred Dual Cholinesterase Inhibitors
Source: Preprints.org preprint supplement (doi:10.20944/preprints202410.0229.v1), 2024-10-03
Supplement: Supplementary file 1 [file supplementary]

*Electronic Supporting Information*

**Efficient access to new structures with incorporated 1,2,3-triazolium salts as preferred dual cholinesterase inhibitors**

Milena Mlakić,1 Maja Ratajec,1 Ana Ratković,2 Anamarija Raspudić,3 Danijela Barić,4 Ivana Šagud,5 Zlata Lasić,6 Ilijana Odak3,***** and Irena Škorić1,*****

1 Department of Organic Chemistry, Faculty of Chemical Engineering and Technology, University of Zagreb, Trg Marka Marulića 19, HR-10 000 Zagreb, Croatia

2 Chemistry, Selvita Ltd., Prilaz Baruna Filipovića 29, HR-10 000 Zagreb, Croatia

3 Department of Chemistry, Faculty of Science and Education, University of Mostar, Matice hrvatske bb, 88 000 Mostar, Bosnia and Herzegovina

4 Group for Computational Life Sciences, Division of Physical Chemistry, Ruđer Bošković Institute, Bijenička cesta 54, HR-10 000 Zagreb, Croatia

5 Croatian Agency for Medicinal Products and Medical Devices, Ksaverska Cesta 4, HR-10 000 Zagreb, Croatia

6 6 TEVA Global R&D, E&L R&D, Pliva Hrvatska d.o.o., Prilaz baruna Filipovića 25, HR-10 000 Zagreb, Croatia

***** Correspondence: ilijana.odak@fpmoz.sum.ba (I.O.); iskoric@fkit.unizg.hr (I.Š.)

**Contents**

1. 1H and 13CNMR spectra of compounds **1**–**31**…………………………………….....2
2. Mass spectra and HRMS analyses of compounds **1–31**………………………........82
3. Cartesian coordinates of docked ligands…………………………………………..103
4. Tables S1 and S2, free energies of binding obtained by docking……………….....110

**1. 1H and 13CNMR spectra of compounds 1–31**
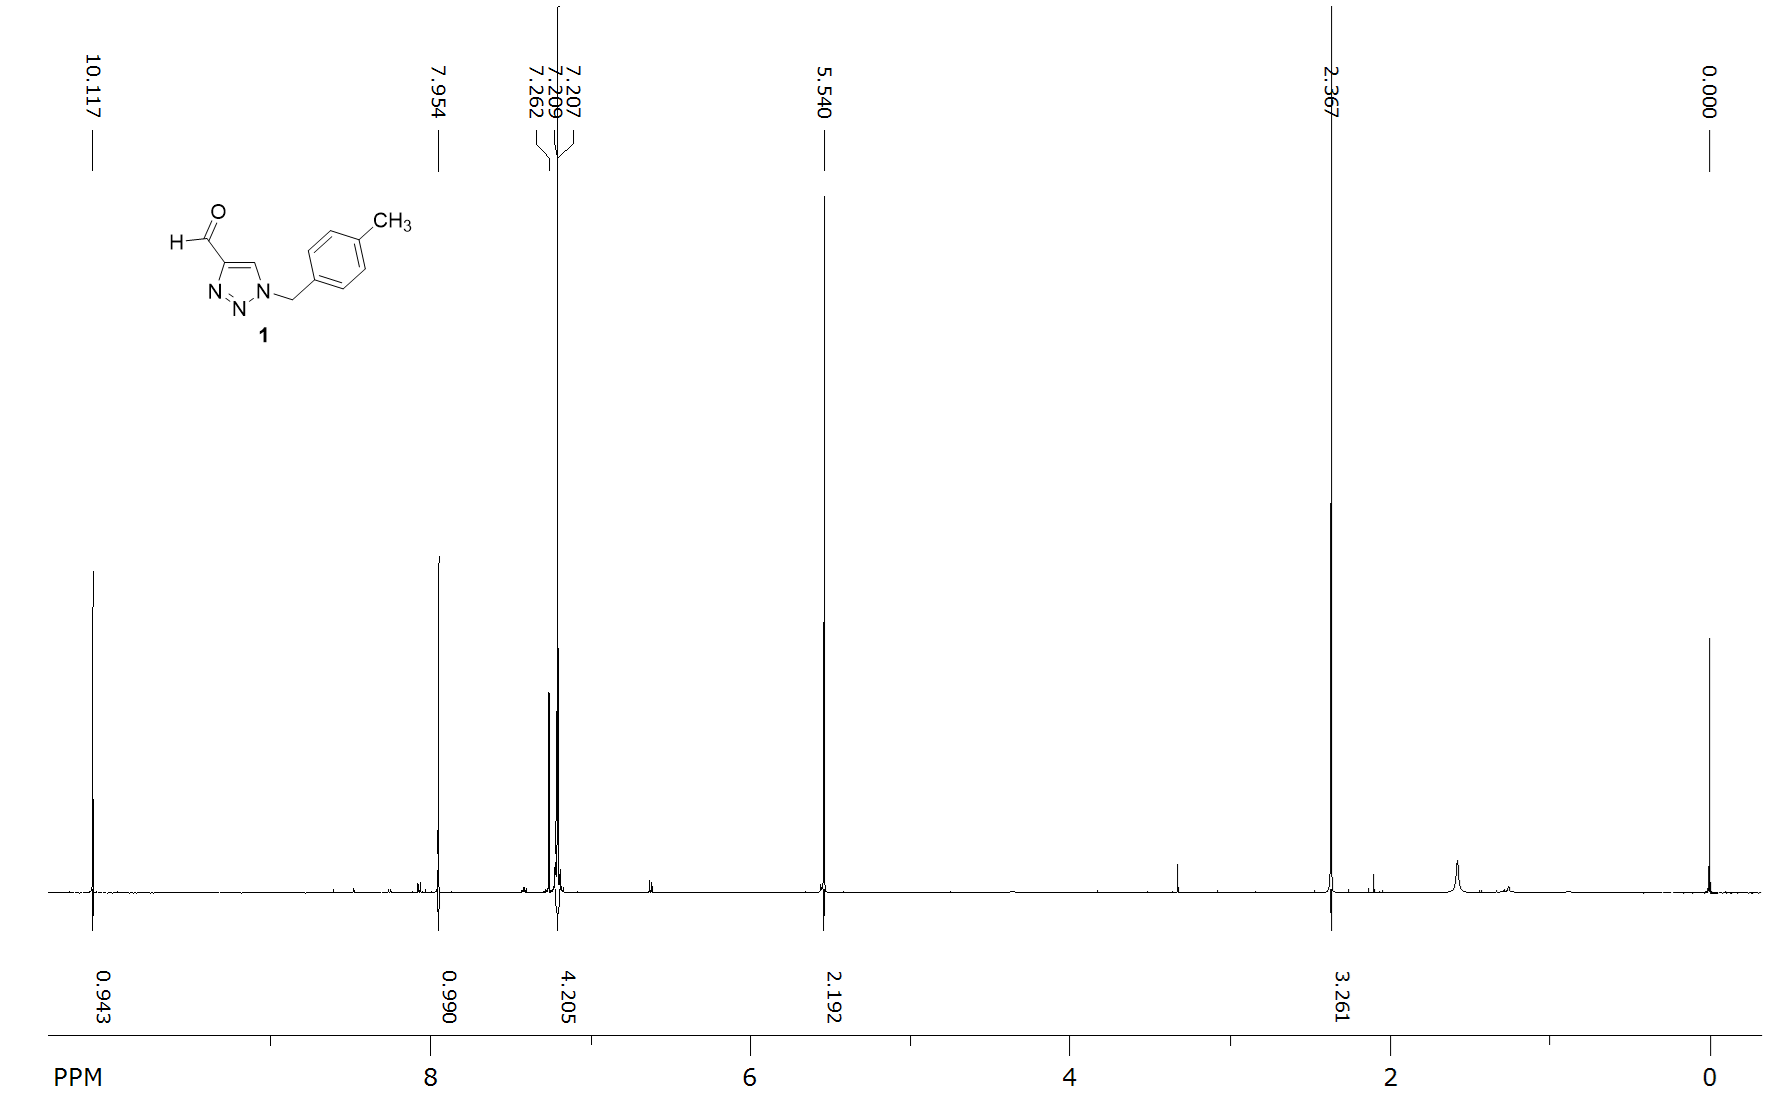


**Figure S1.** 1H NMR (CDCl3) spectrum of **1**.

**
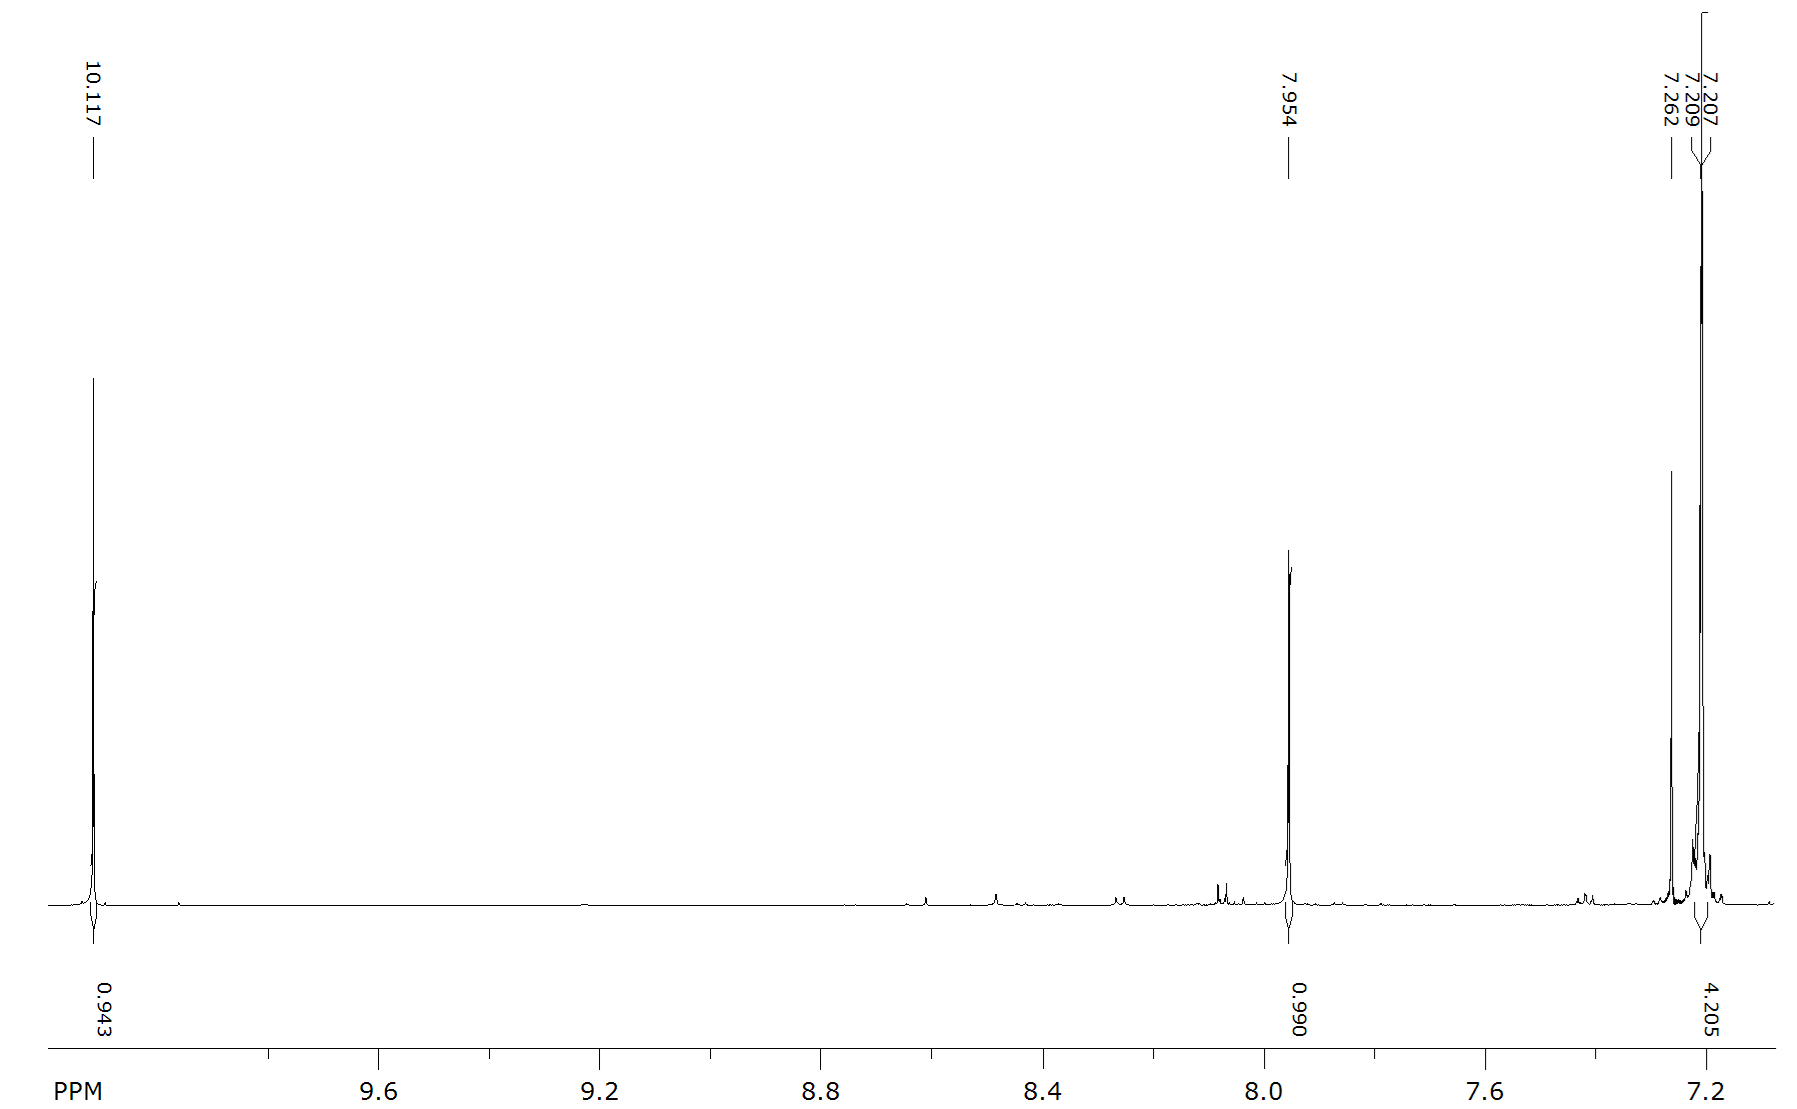
**

**Figure S2.** Part of the 1H NMR (CDCl3) spectrum of **1**.

**
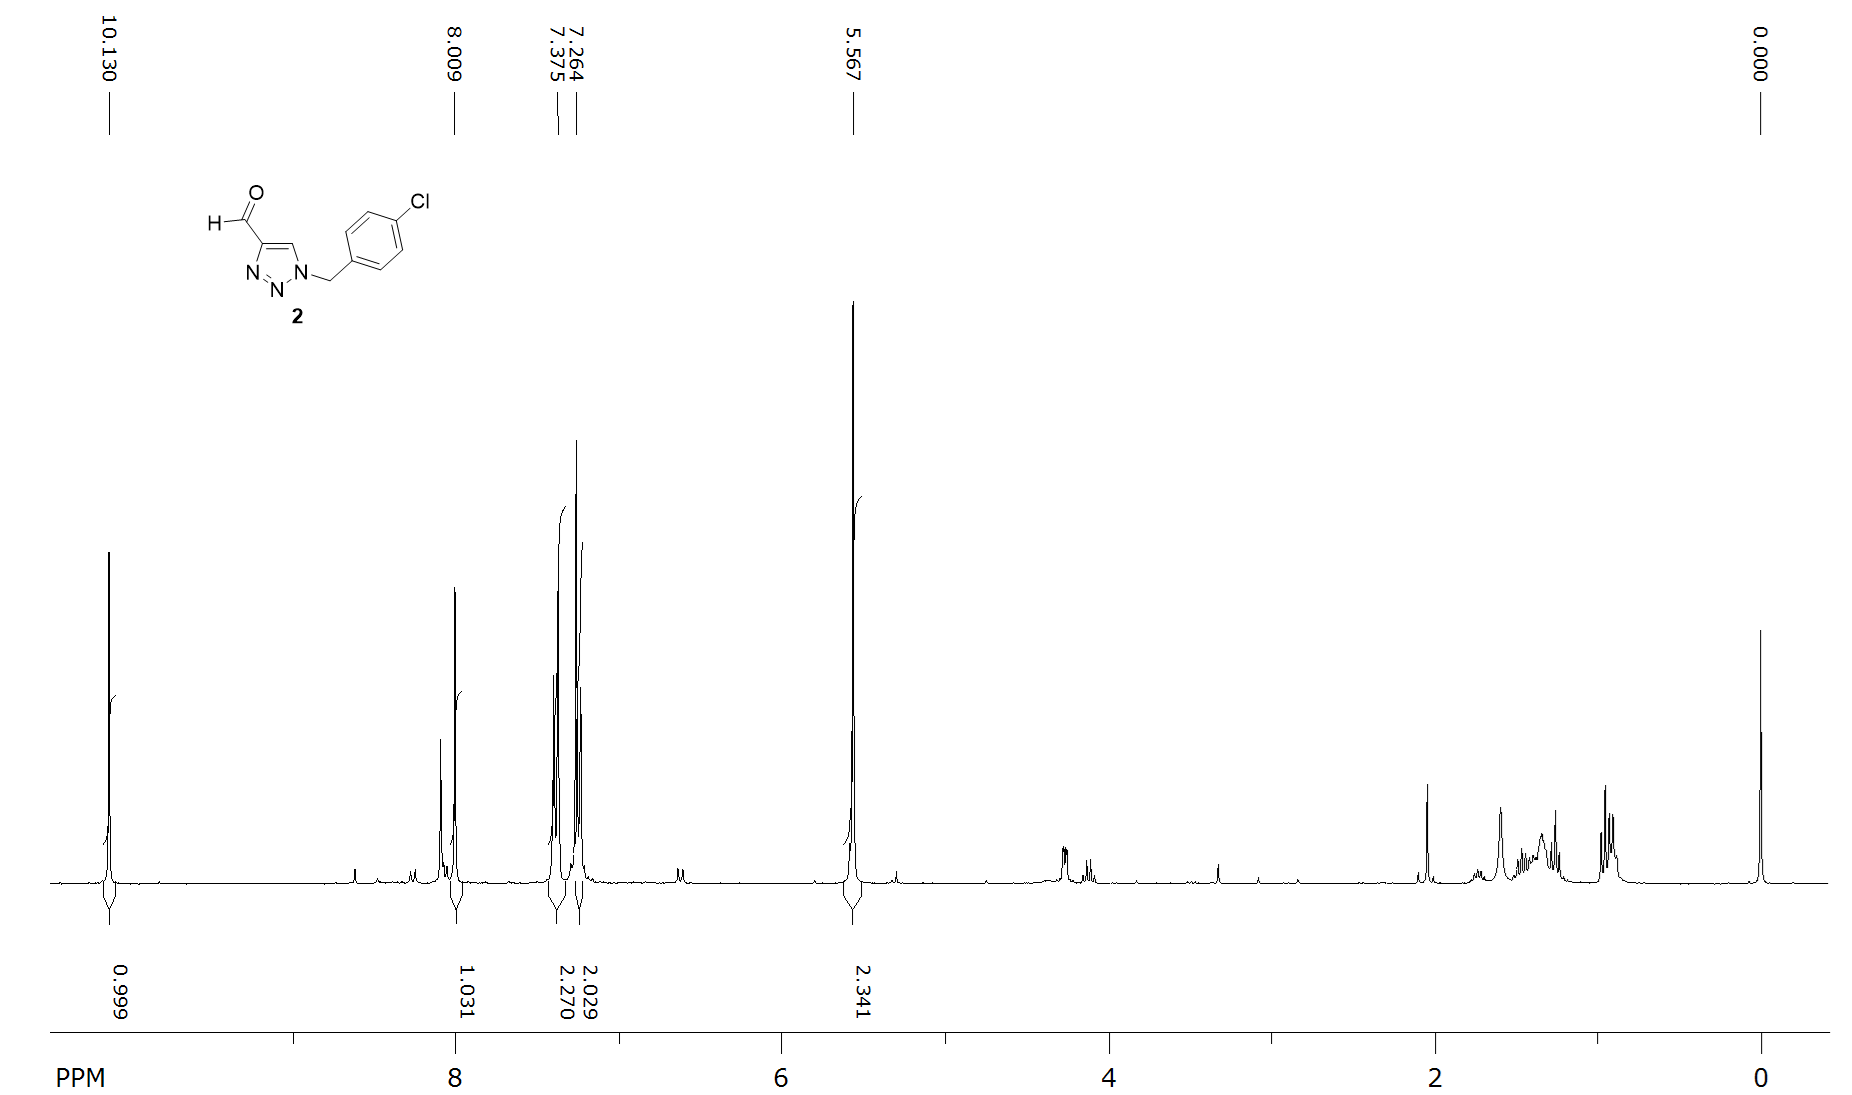
**

**Figure S3.** 1H NMR (CDCl3) spectrum of **2**.


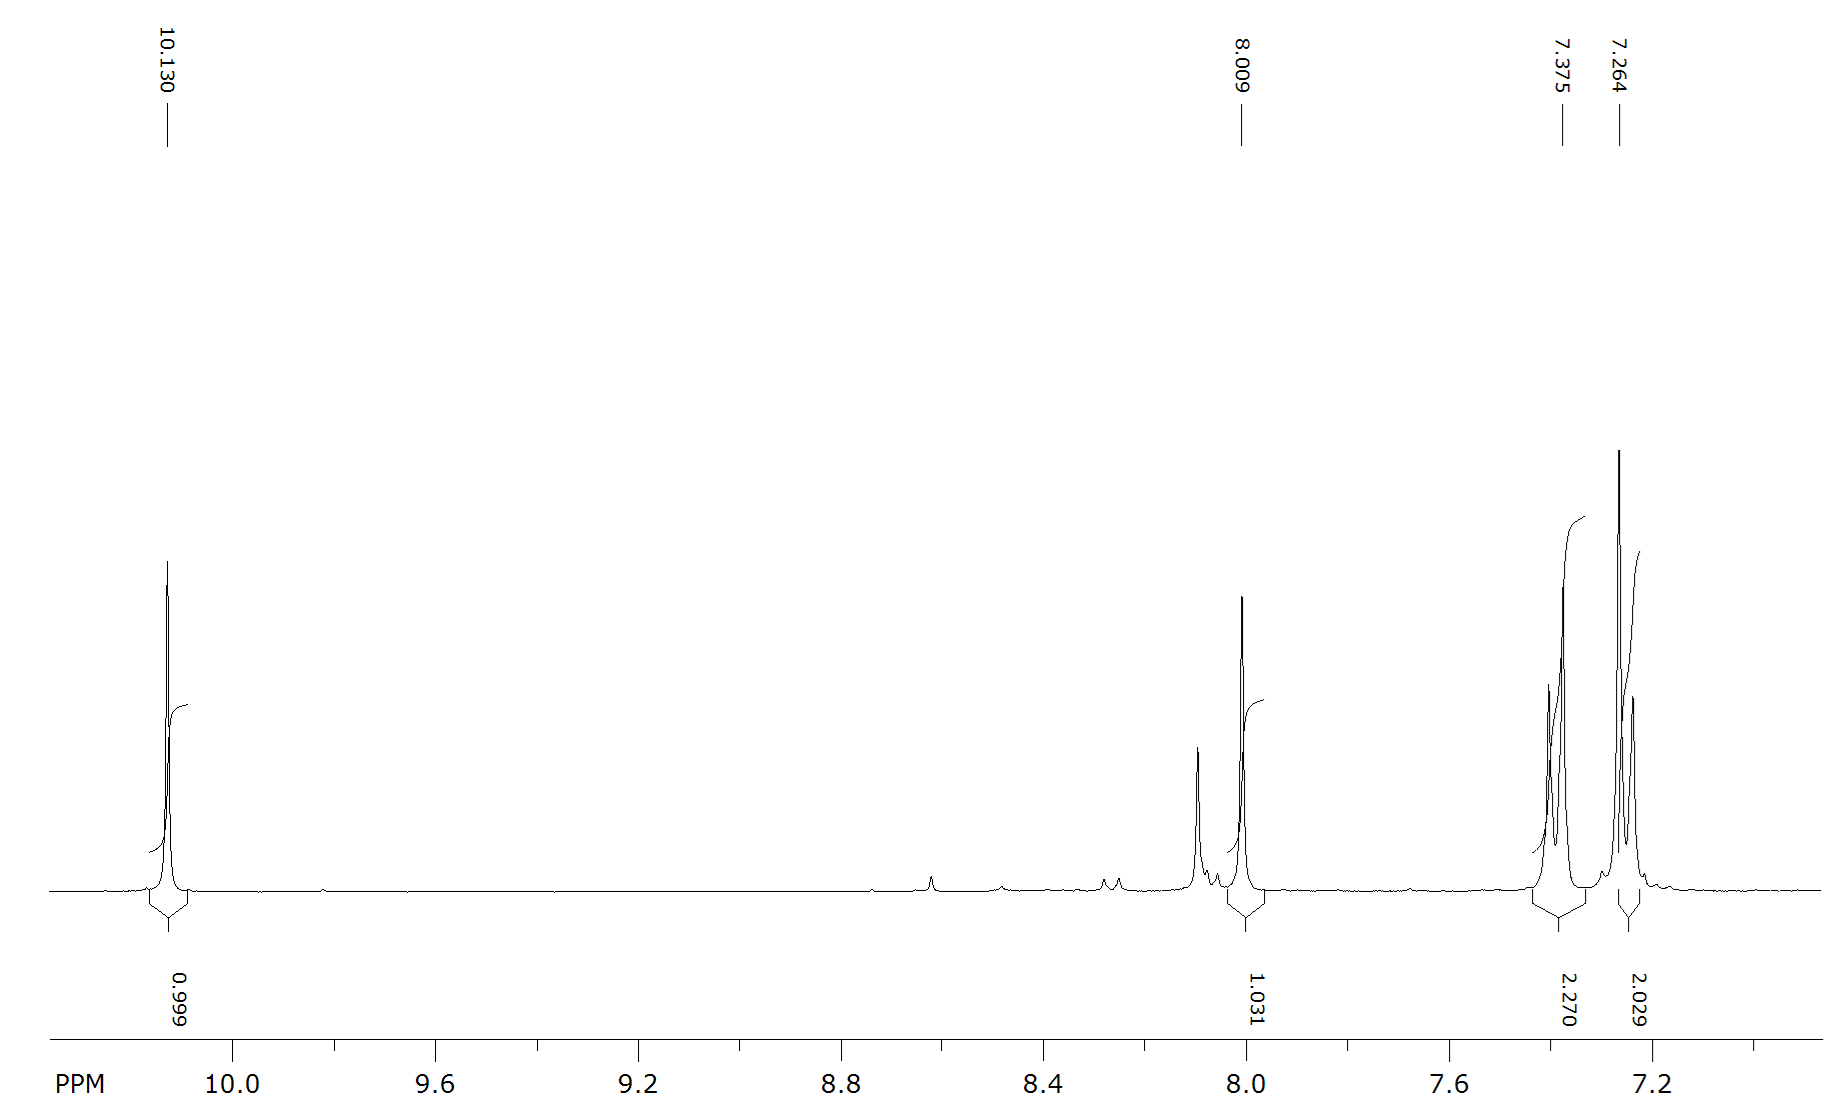


**Figure S4.** Part of the 1H NMR (CDCl3) spectrum of **2**.


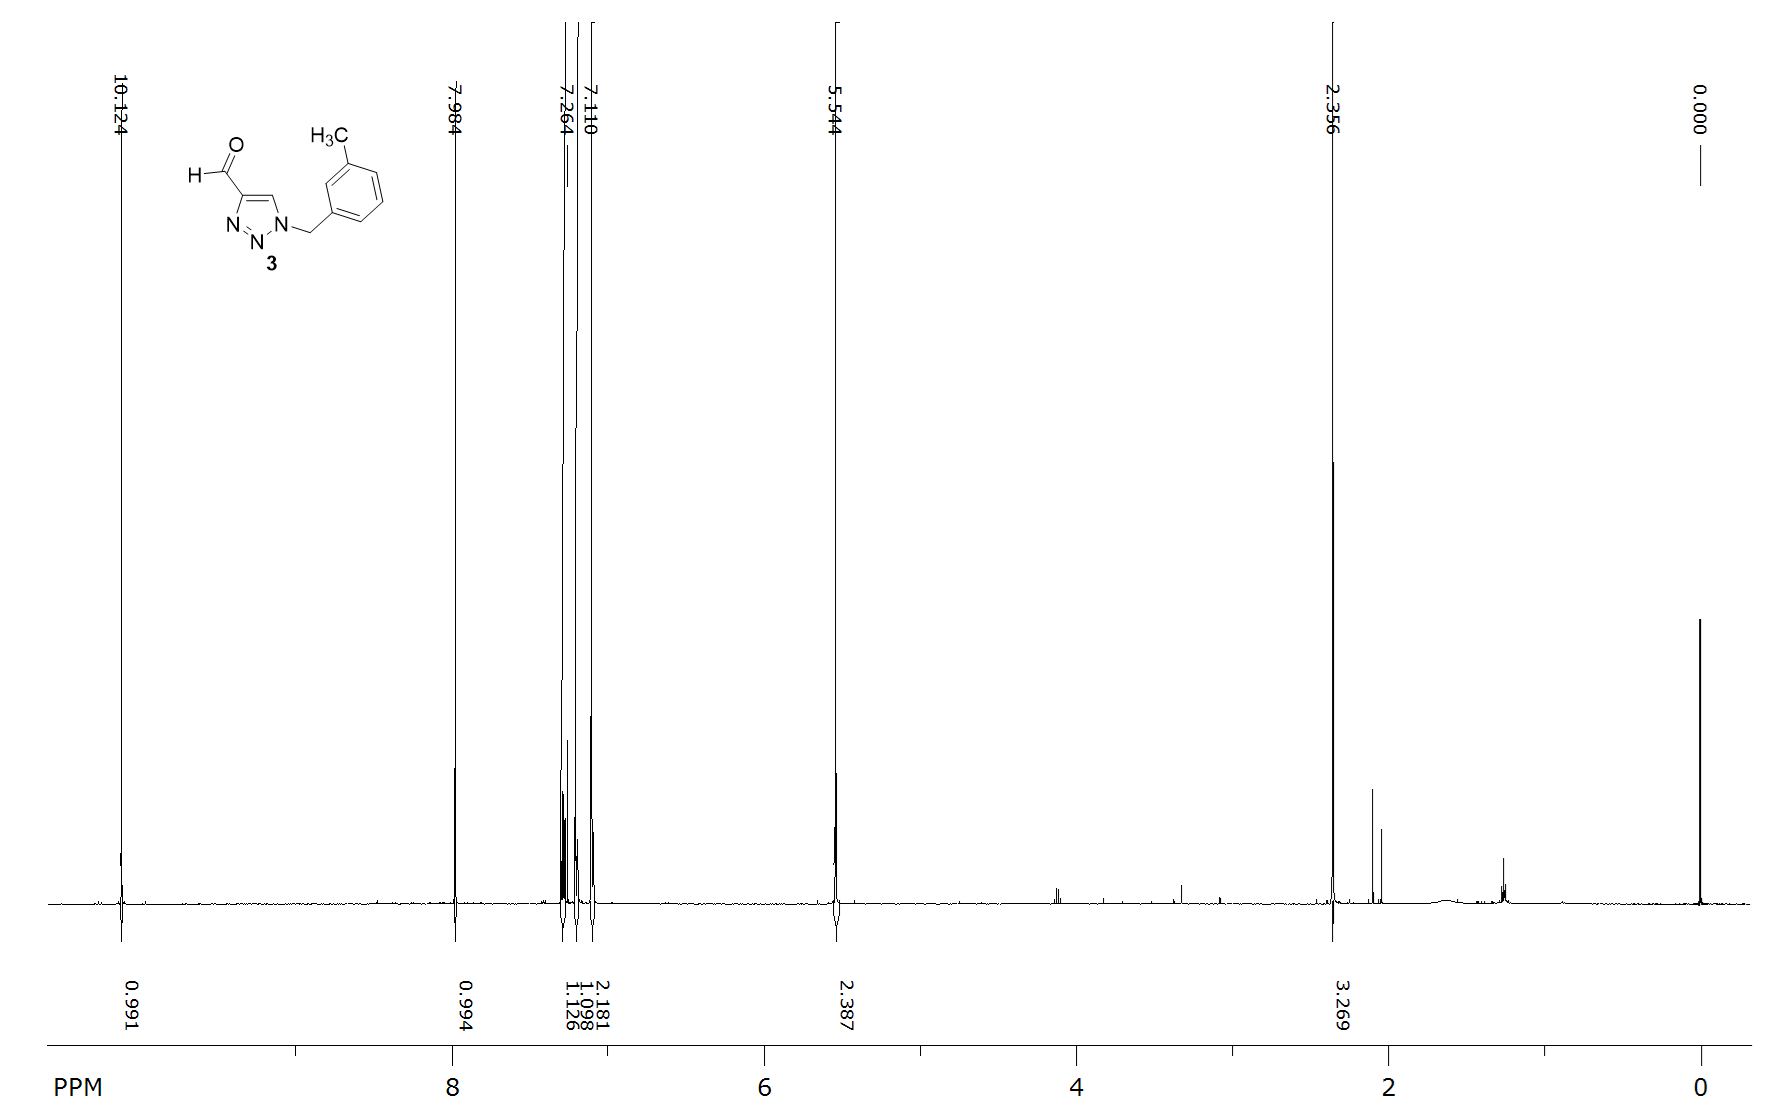


**Figure S5.** 1H NMR (CDCl3) spectrum of **3**.


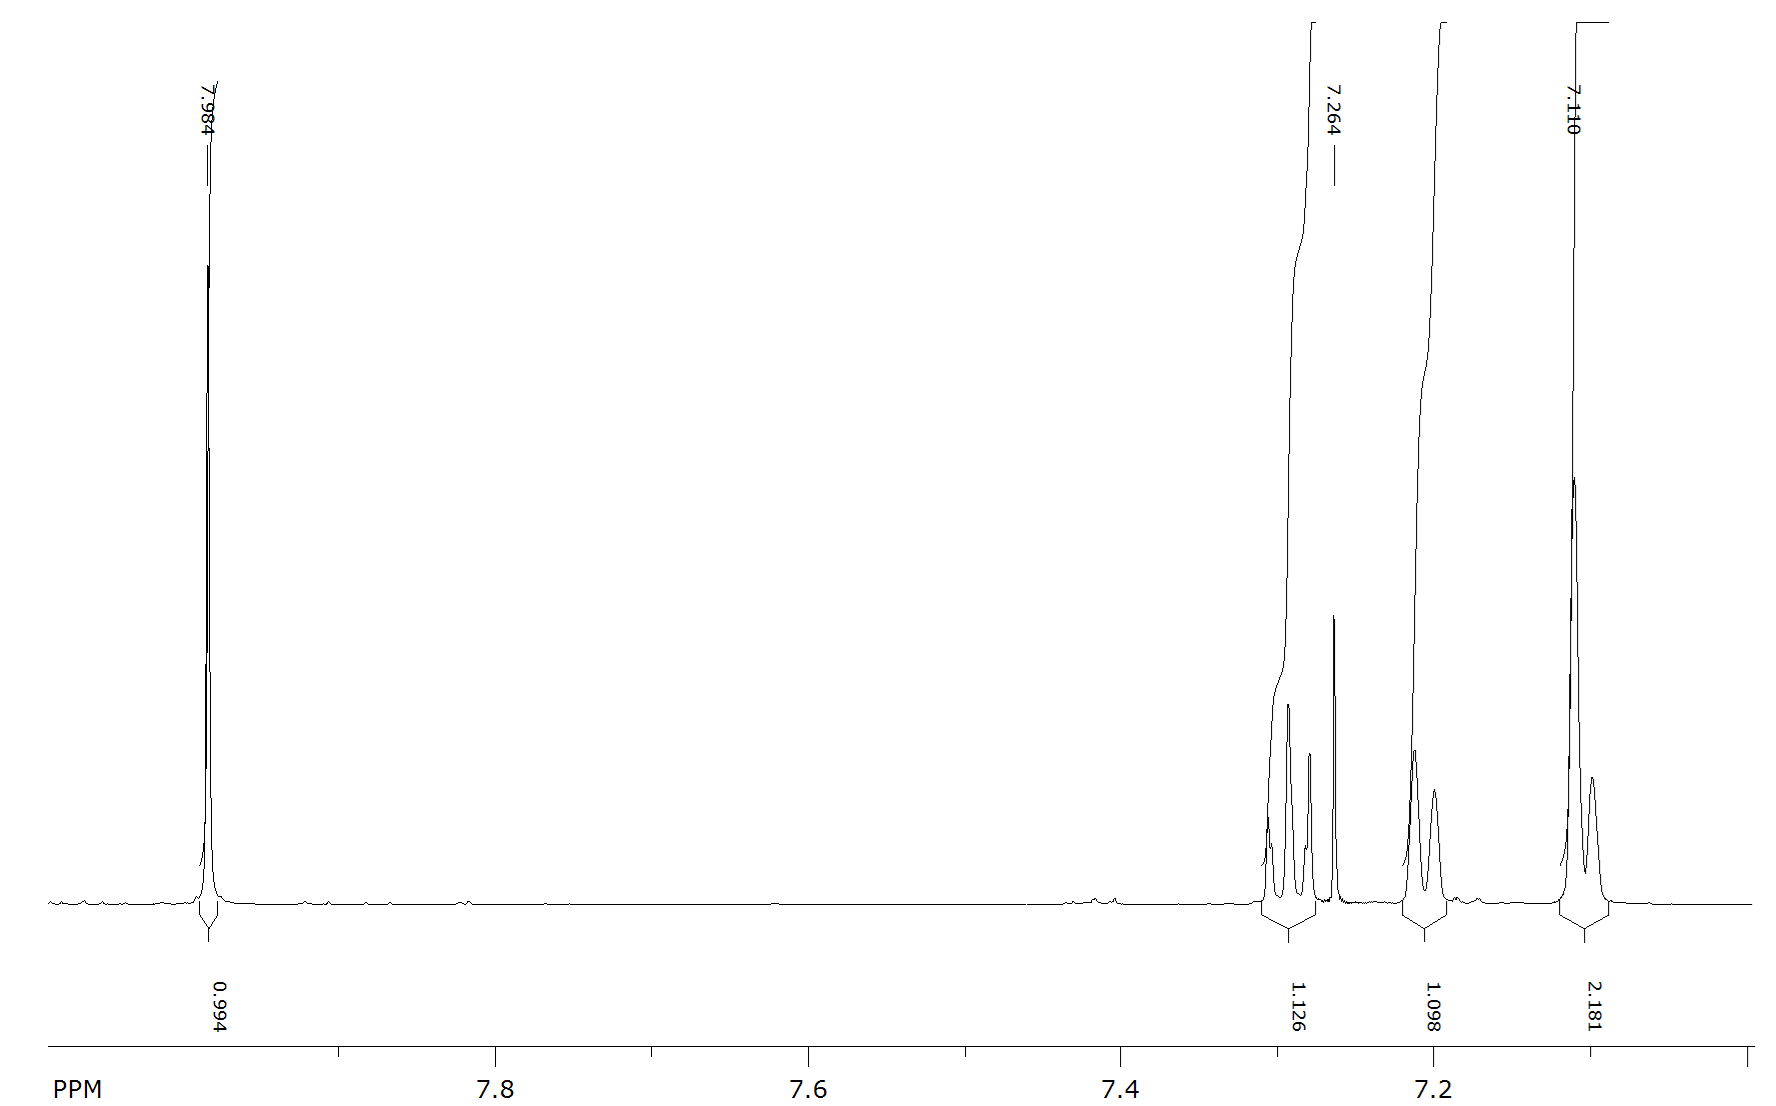


**Figure S6.** Part of the 1H NMR (CDCl3) spectrum of **3**.


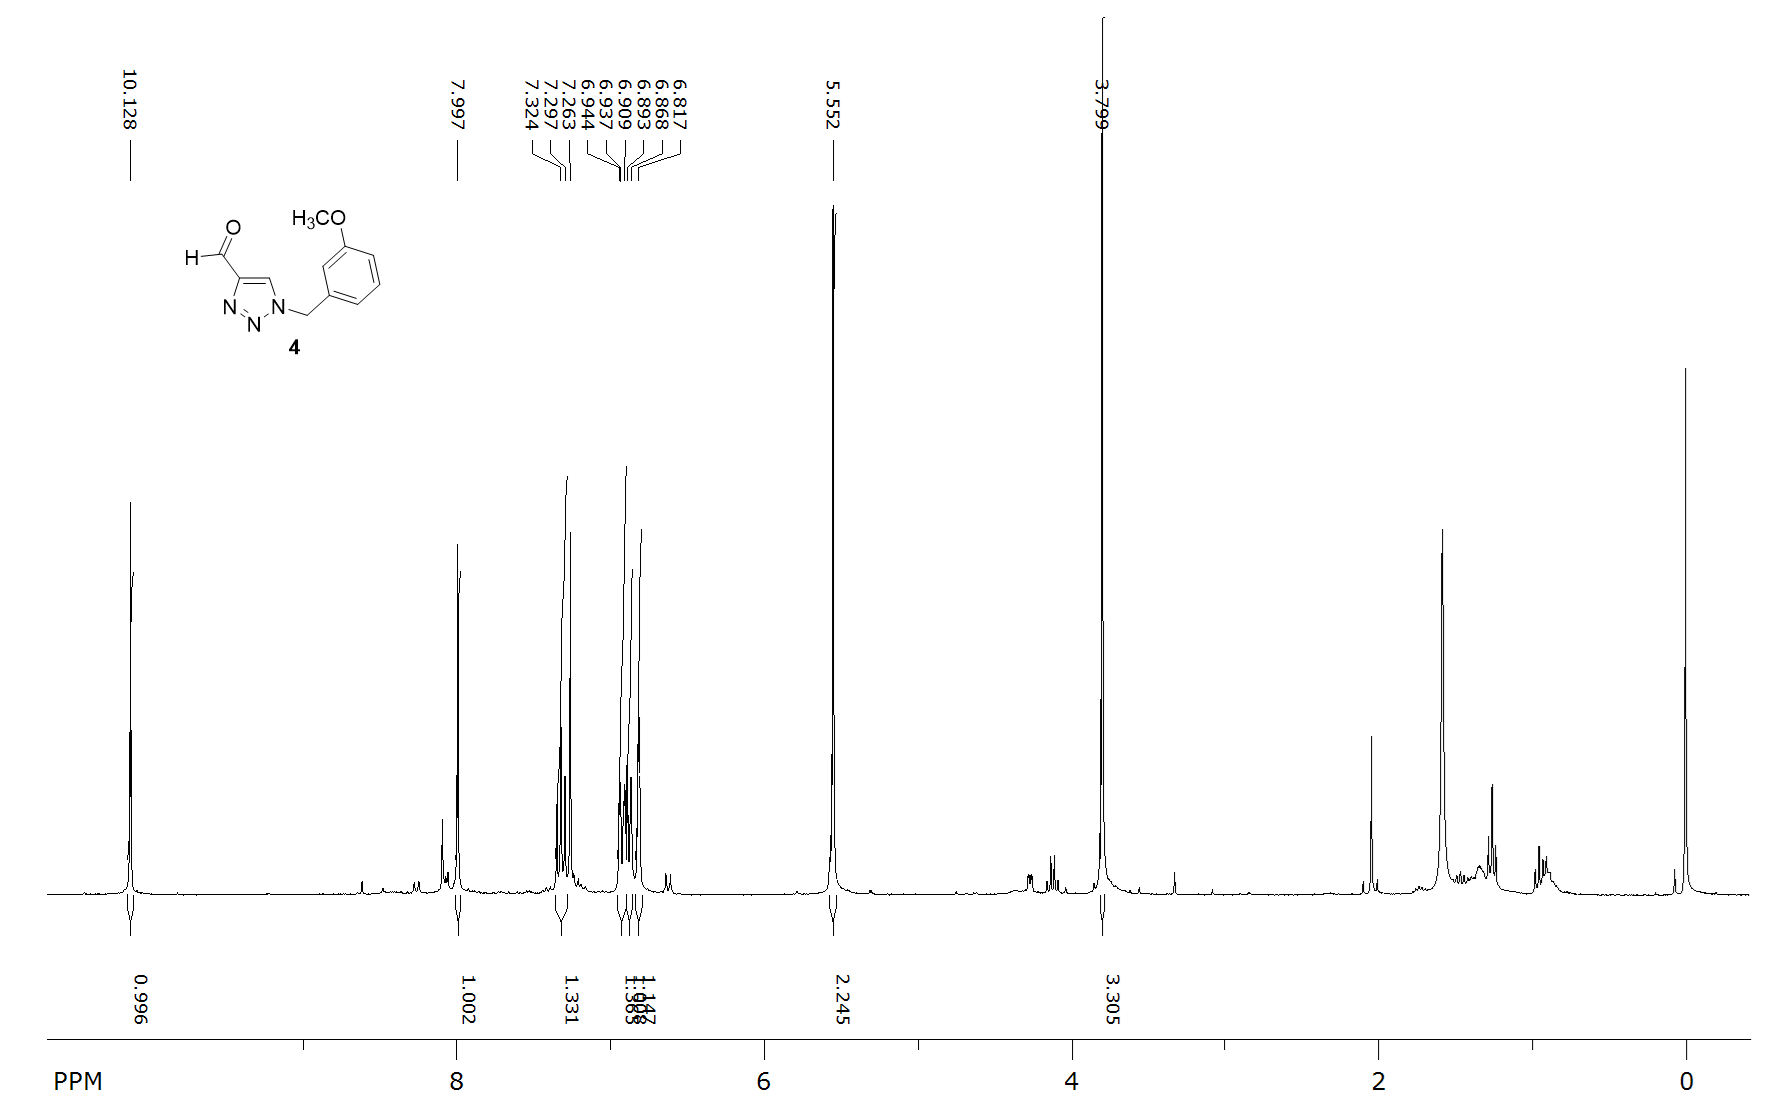


**Figure S7.** 1H NMR (CDCl3) spectrum of **4**.


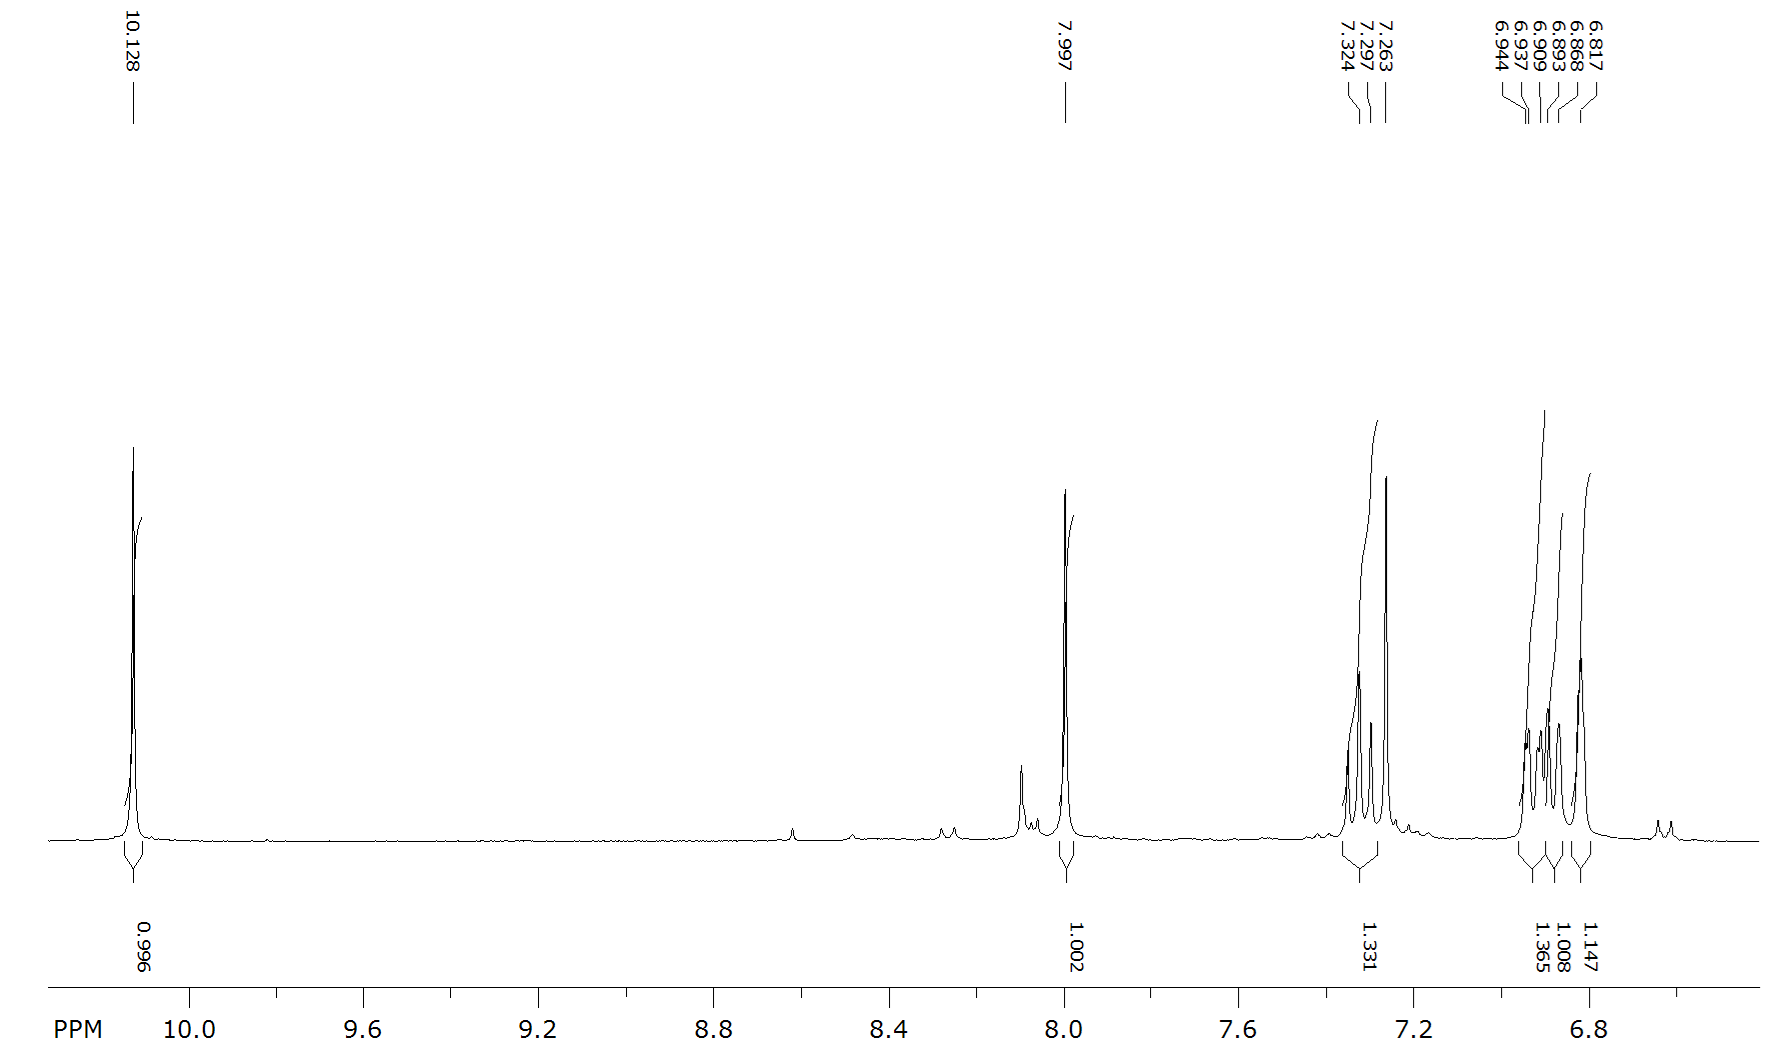


**Figure S8.** Part of the 1H NMR (CDCl3) spectrum of **4**.


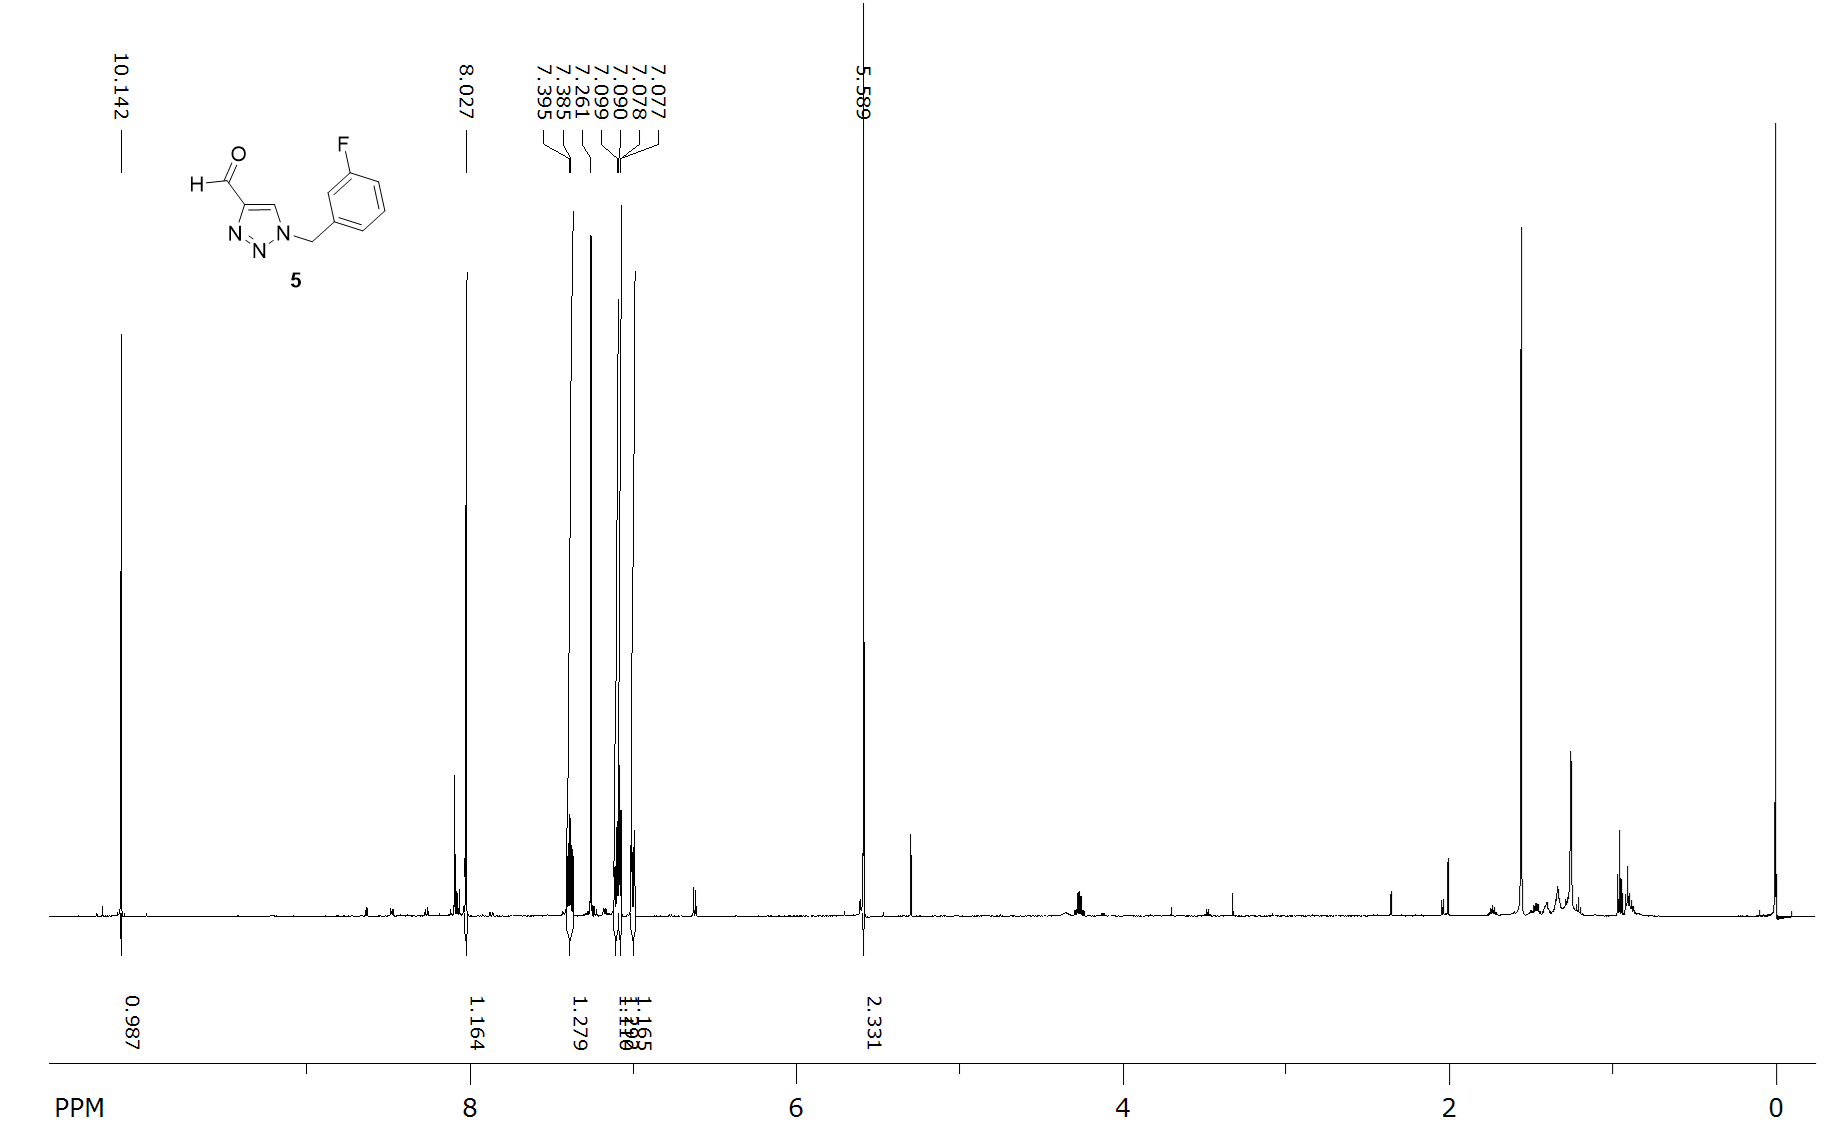


**Figure S9.** 1H NMR (CDCl3) spectrum of **5**.


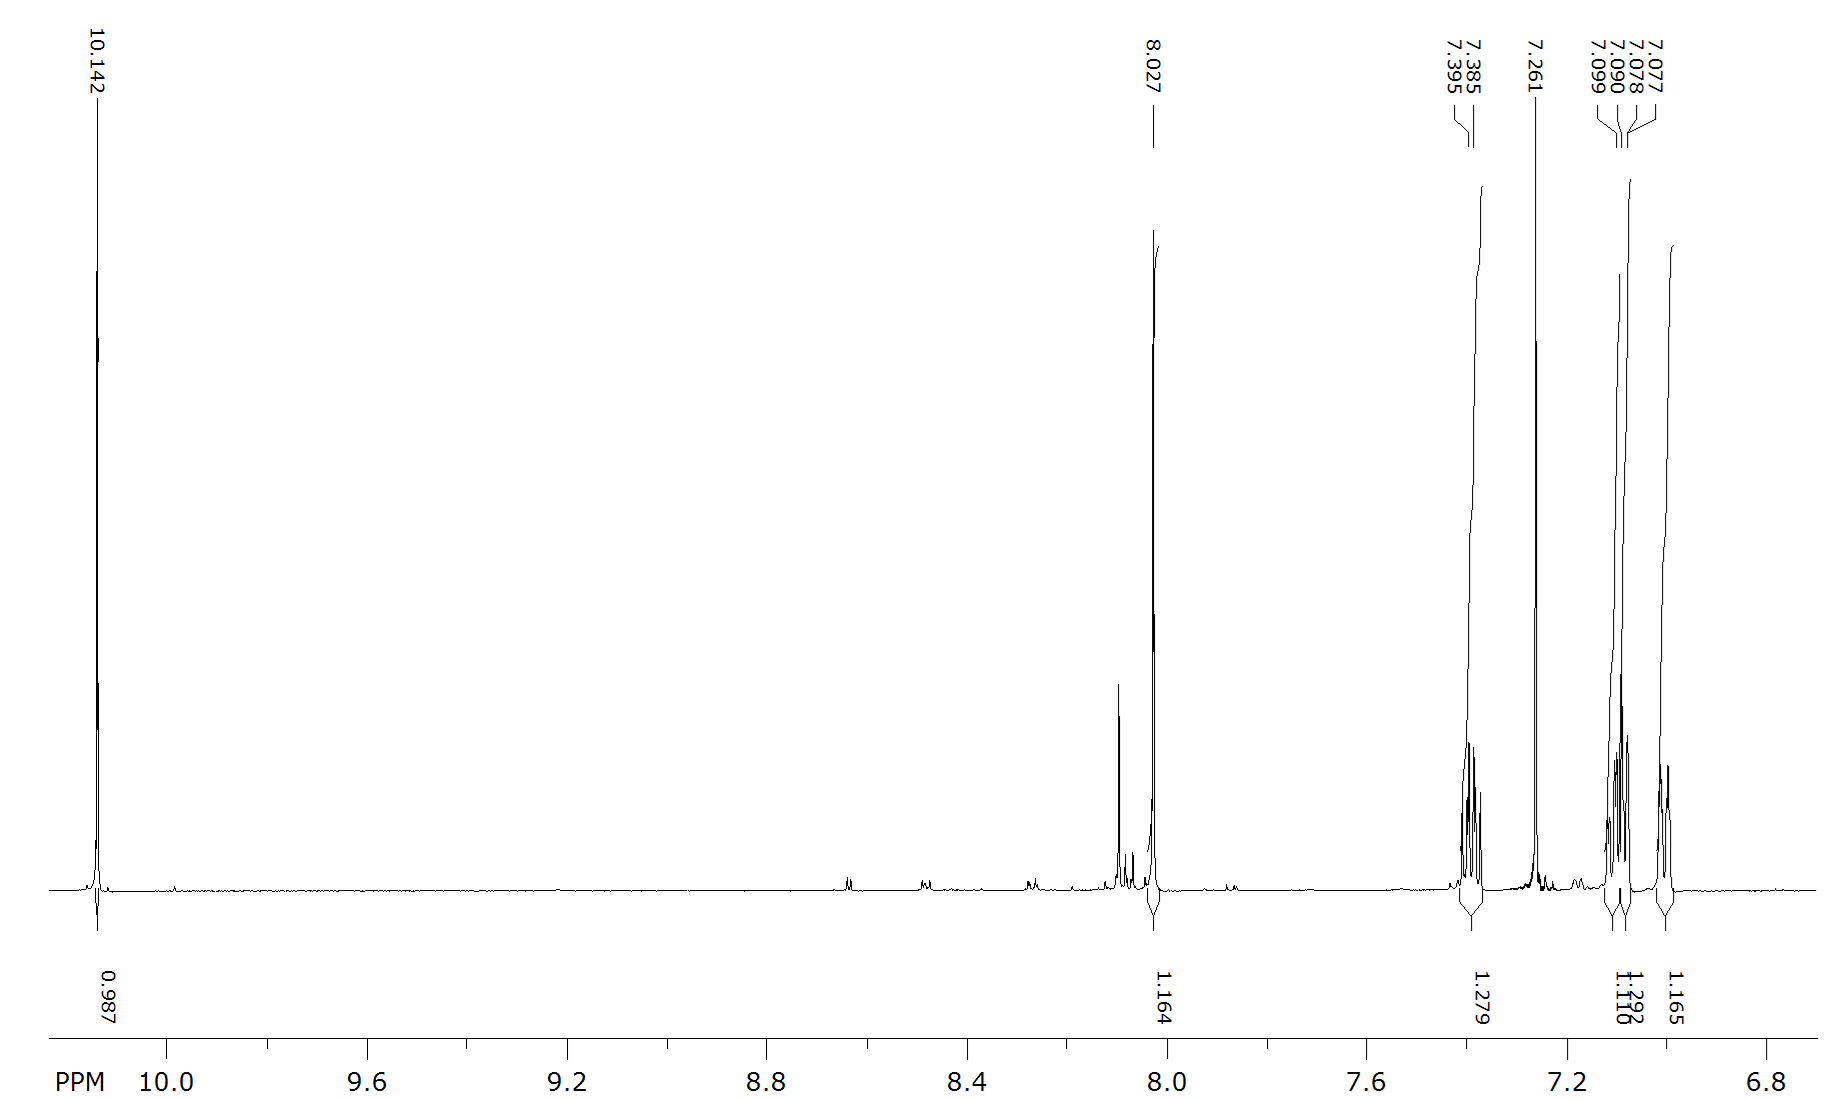


**Figure S10.** Part of the 1H NMR (CDCl3) spectrum of **5**.


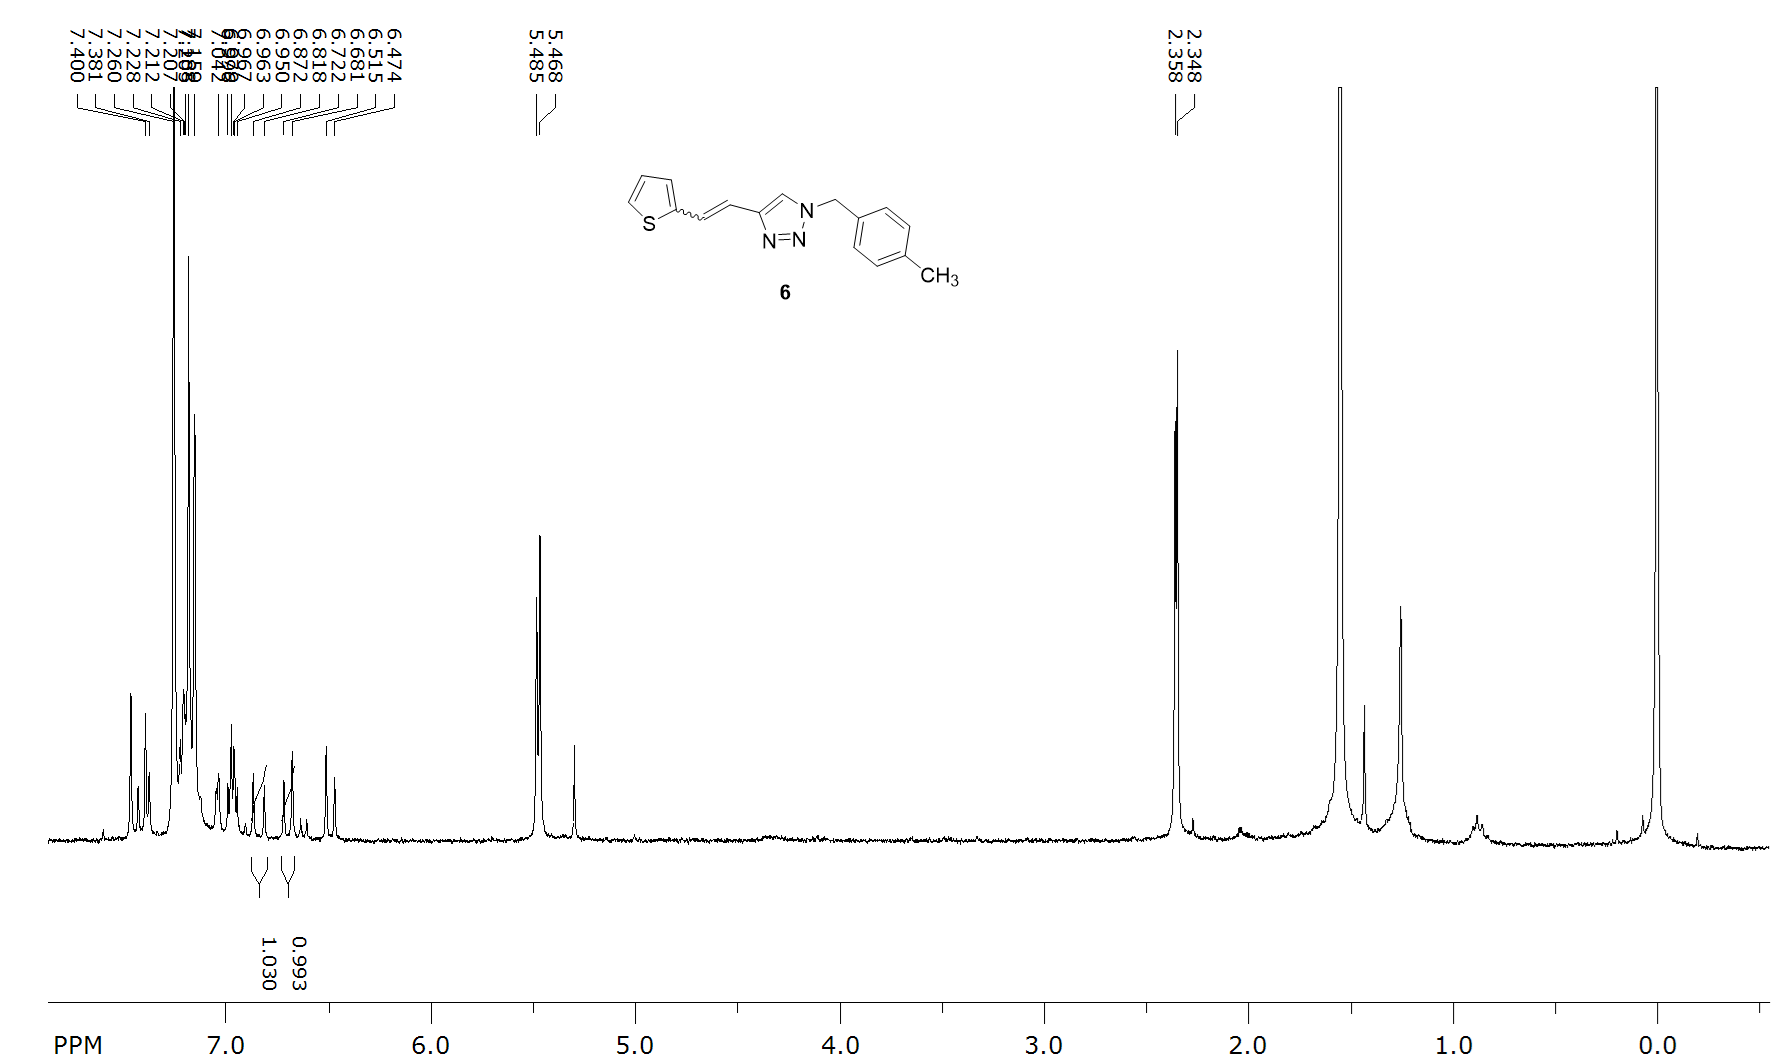


**Figure S11.** 1H NMR (CDCl3) spectrum of a mixture of isomers of **6**.


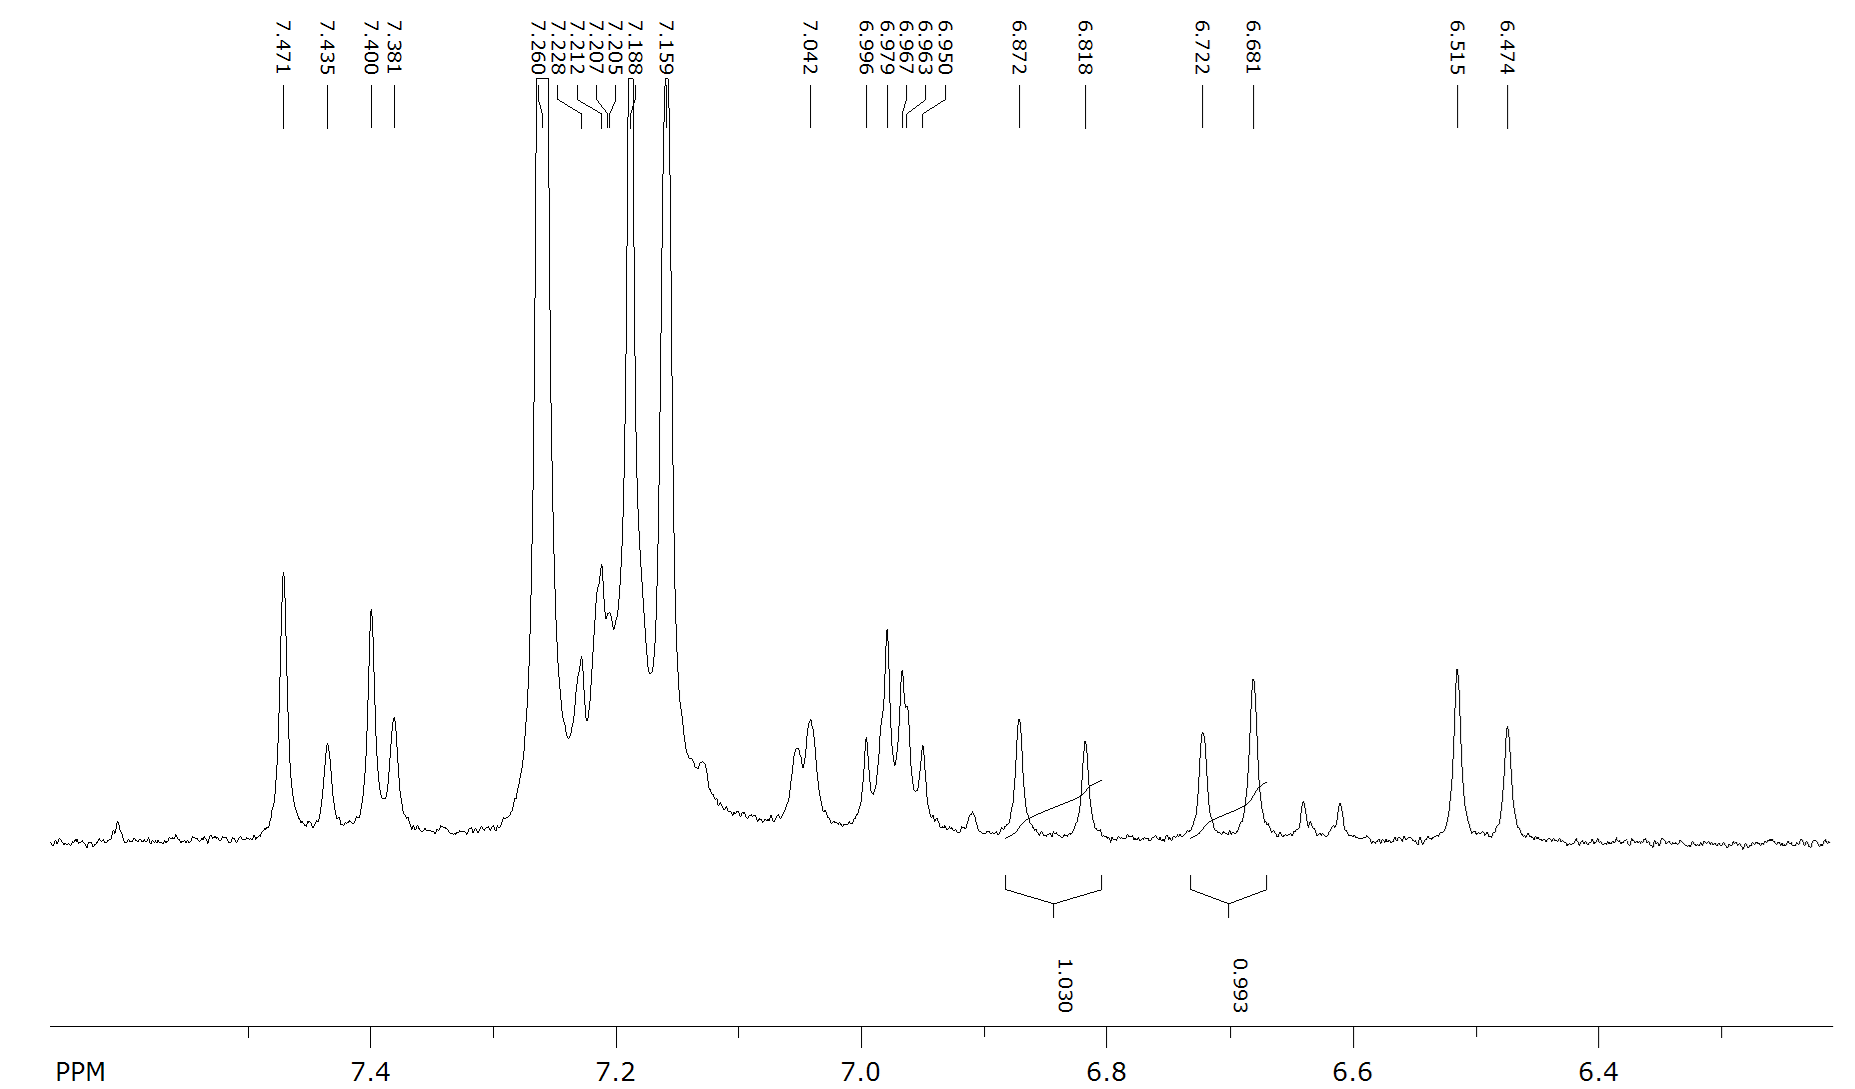


**Figure S12.** Unsaturated part of the 1H NMR (CDCl3) spectrum of a mixture of isomers of **6**.


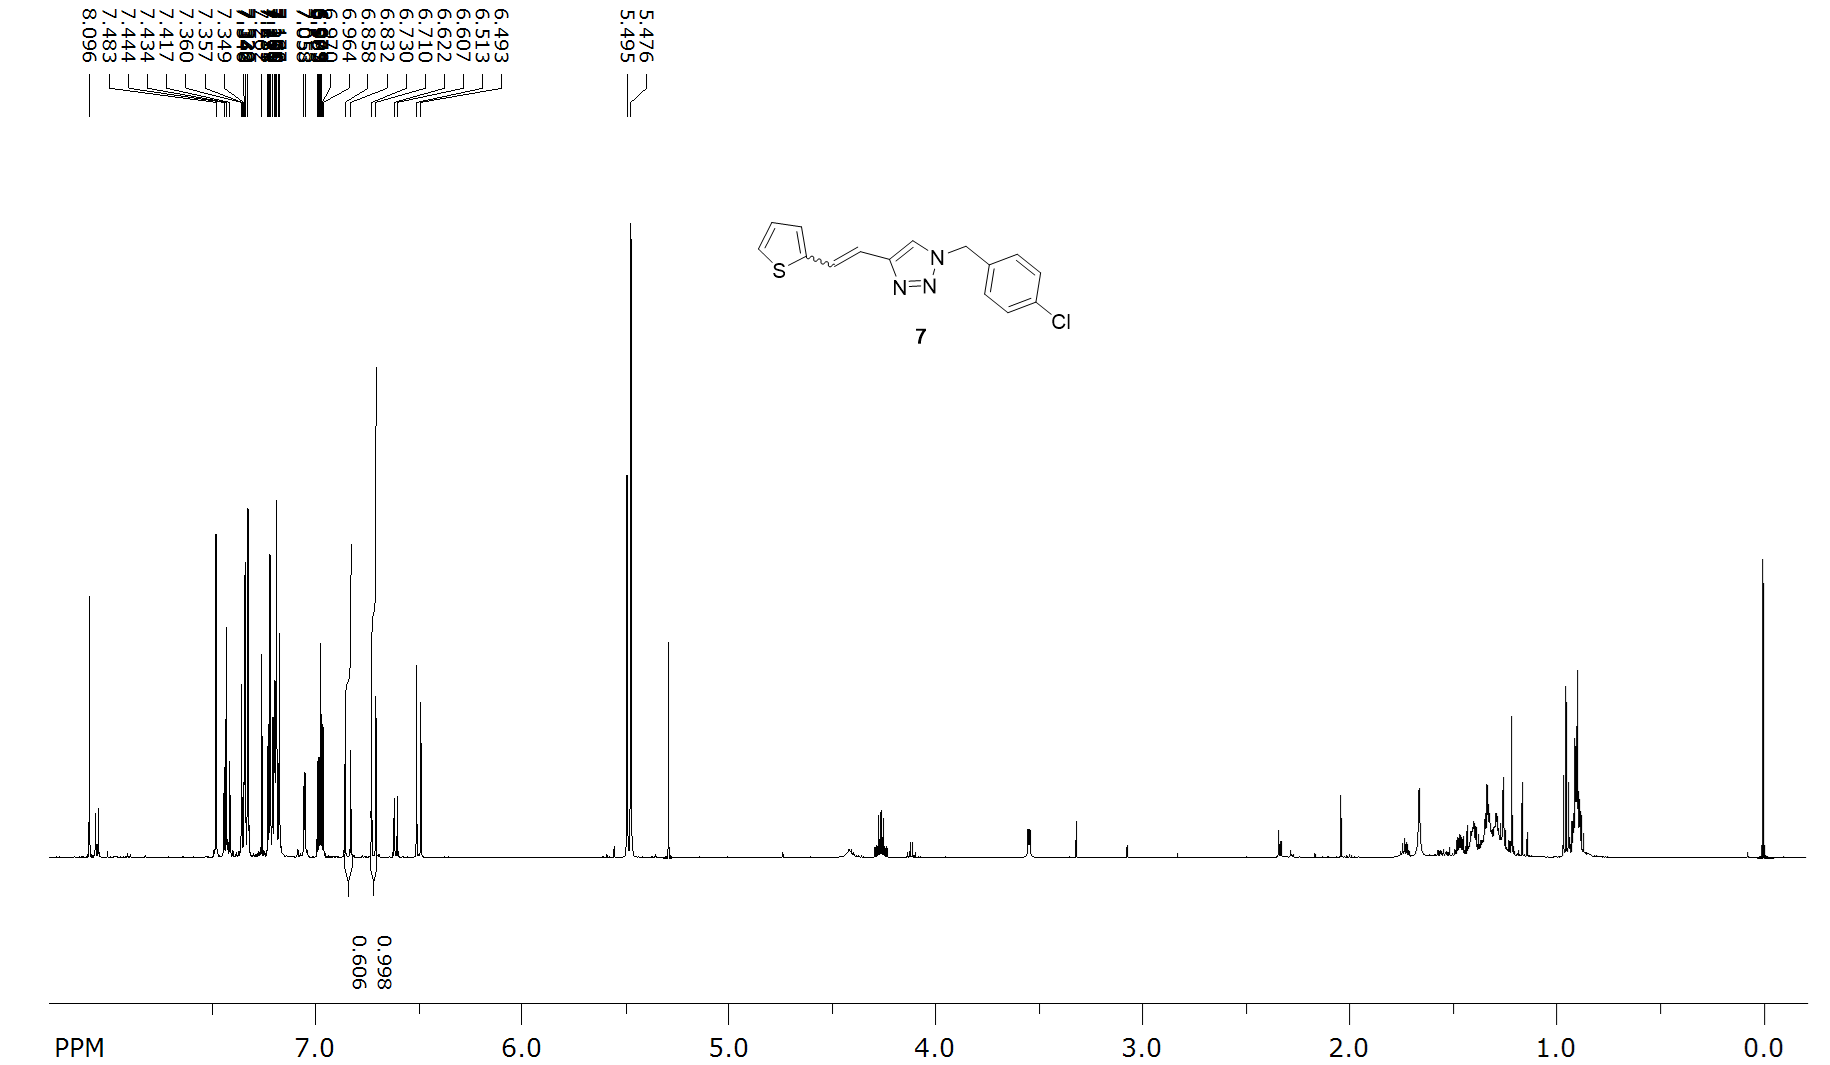


**Figure S13.** 1H NMR (CDCl3) spectrum of a mixture of isomers of **7**.


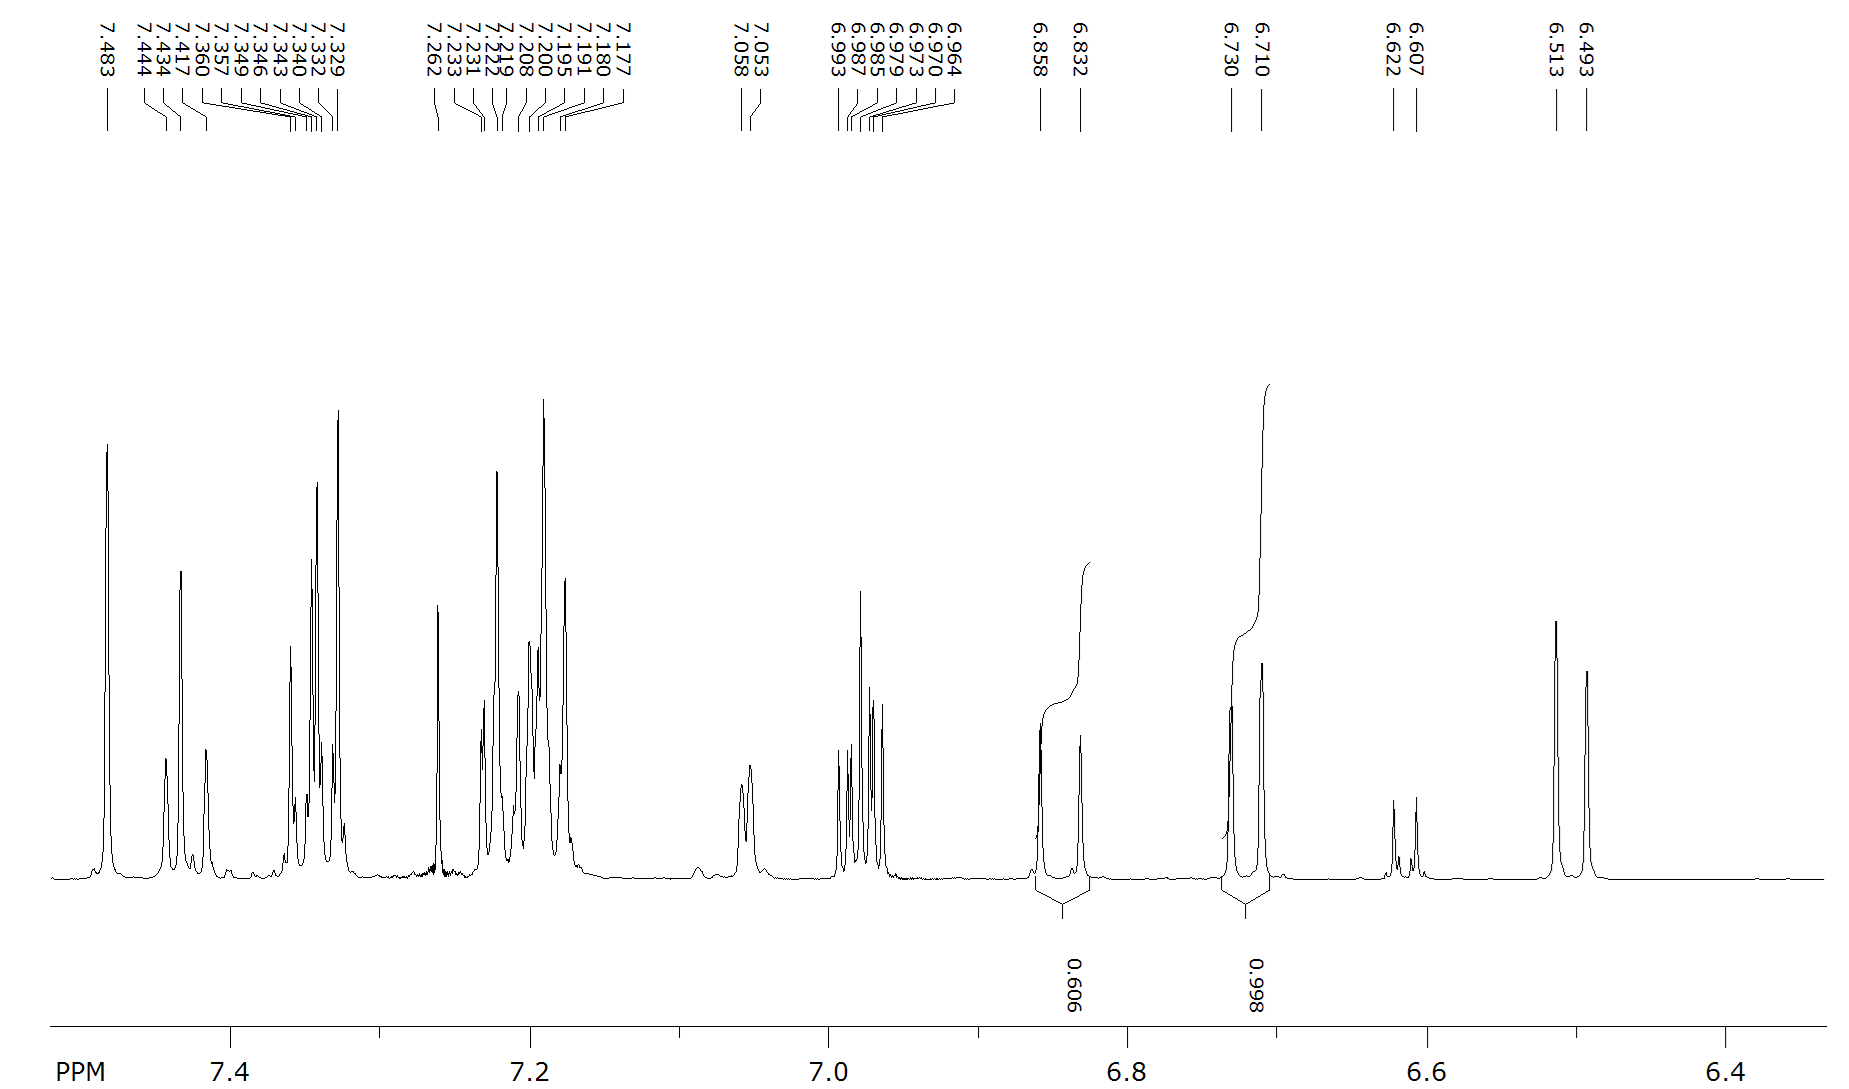


**Figure S14.** Unsaturated part of the 1H NMR (CDCl3) spectrum of a mixture of isomers of **7**.


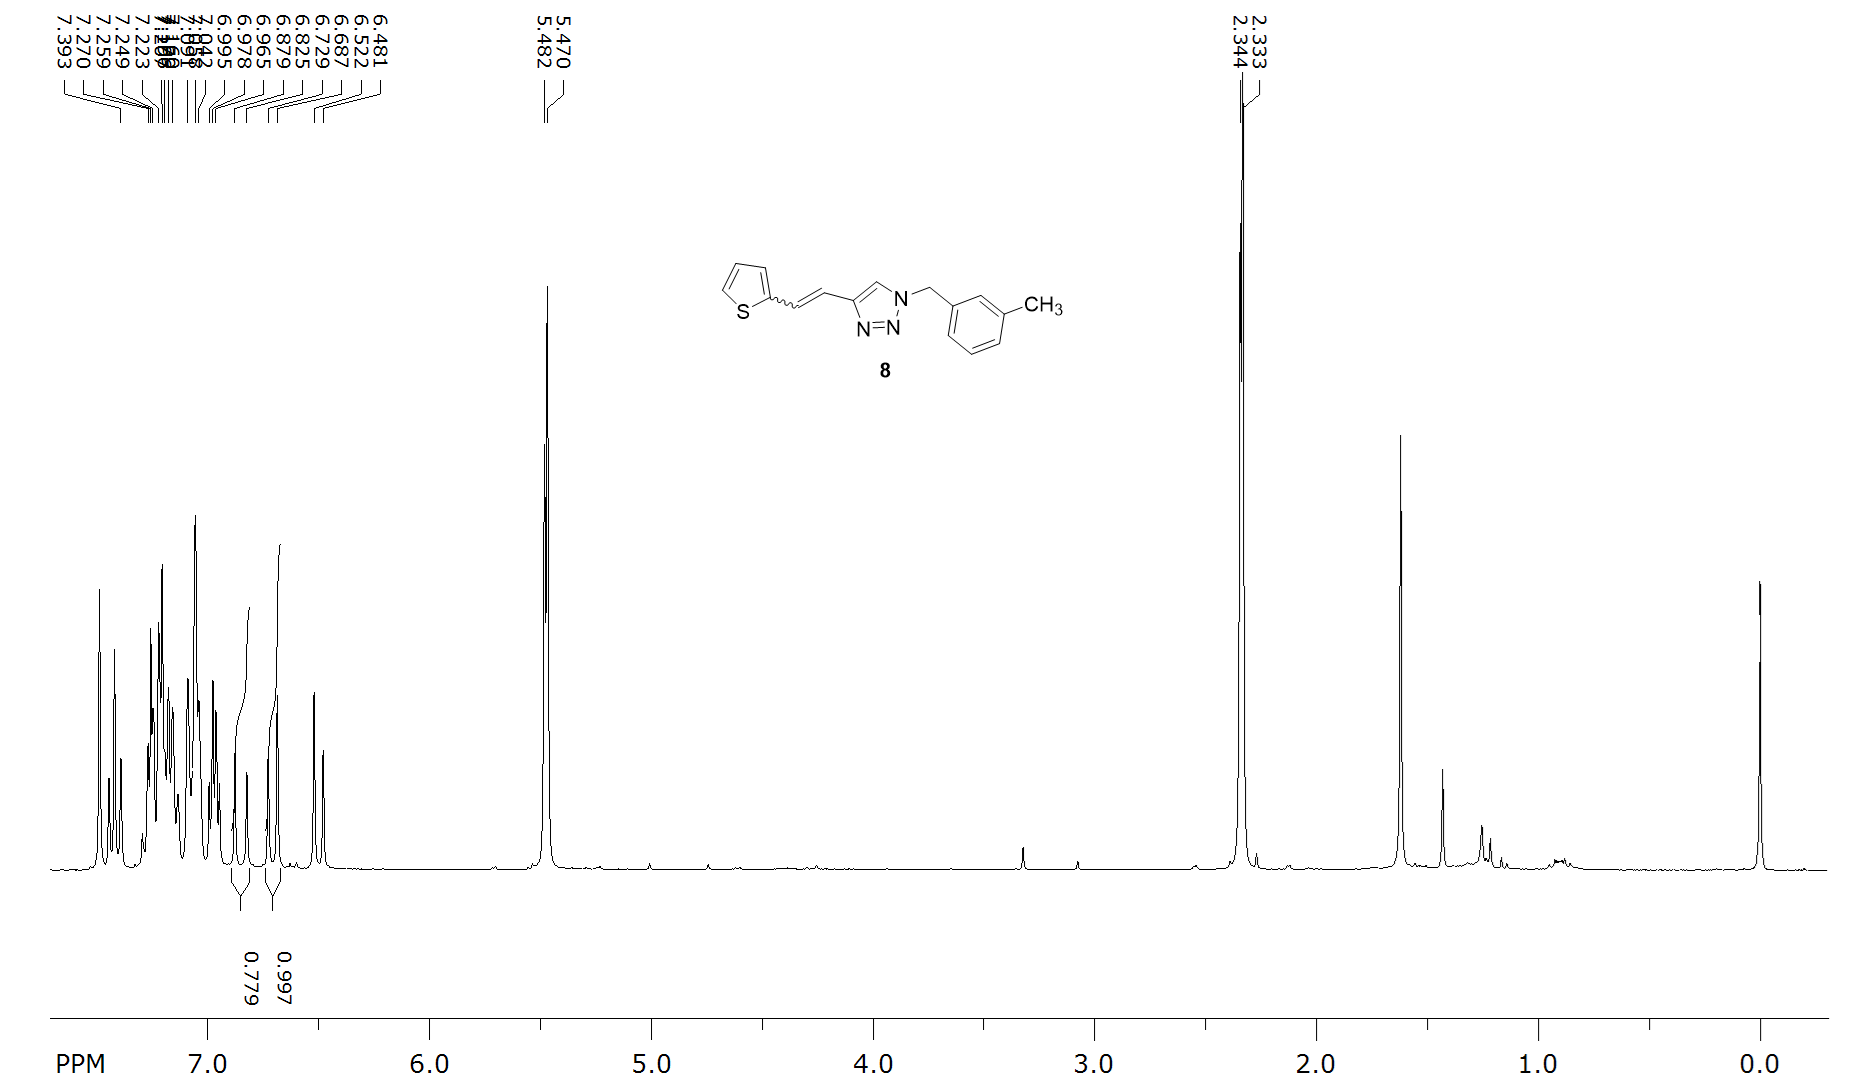


**Figure S15.** 1H NMR (CDCl3) spectrum of a mixture of isomers of **8**.


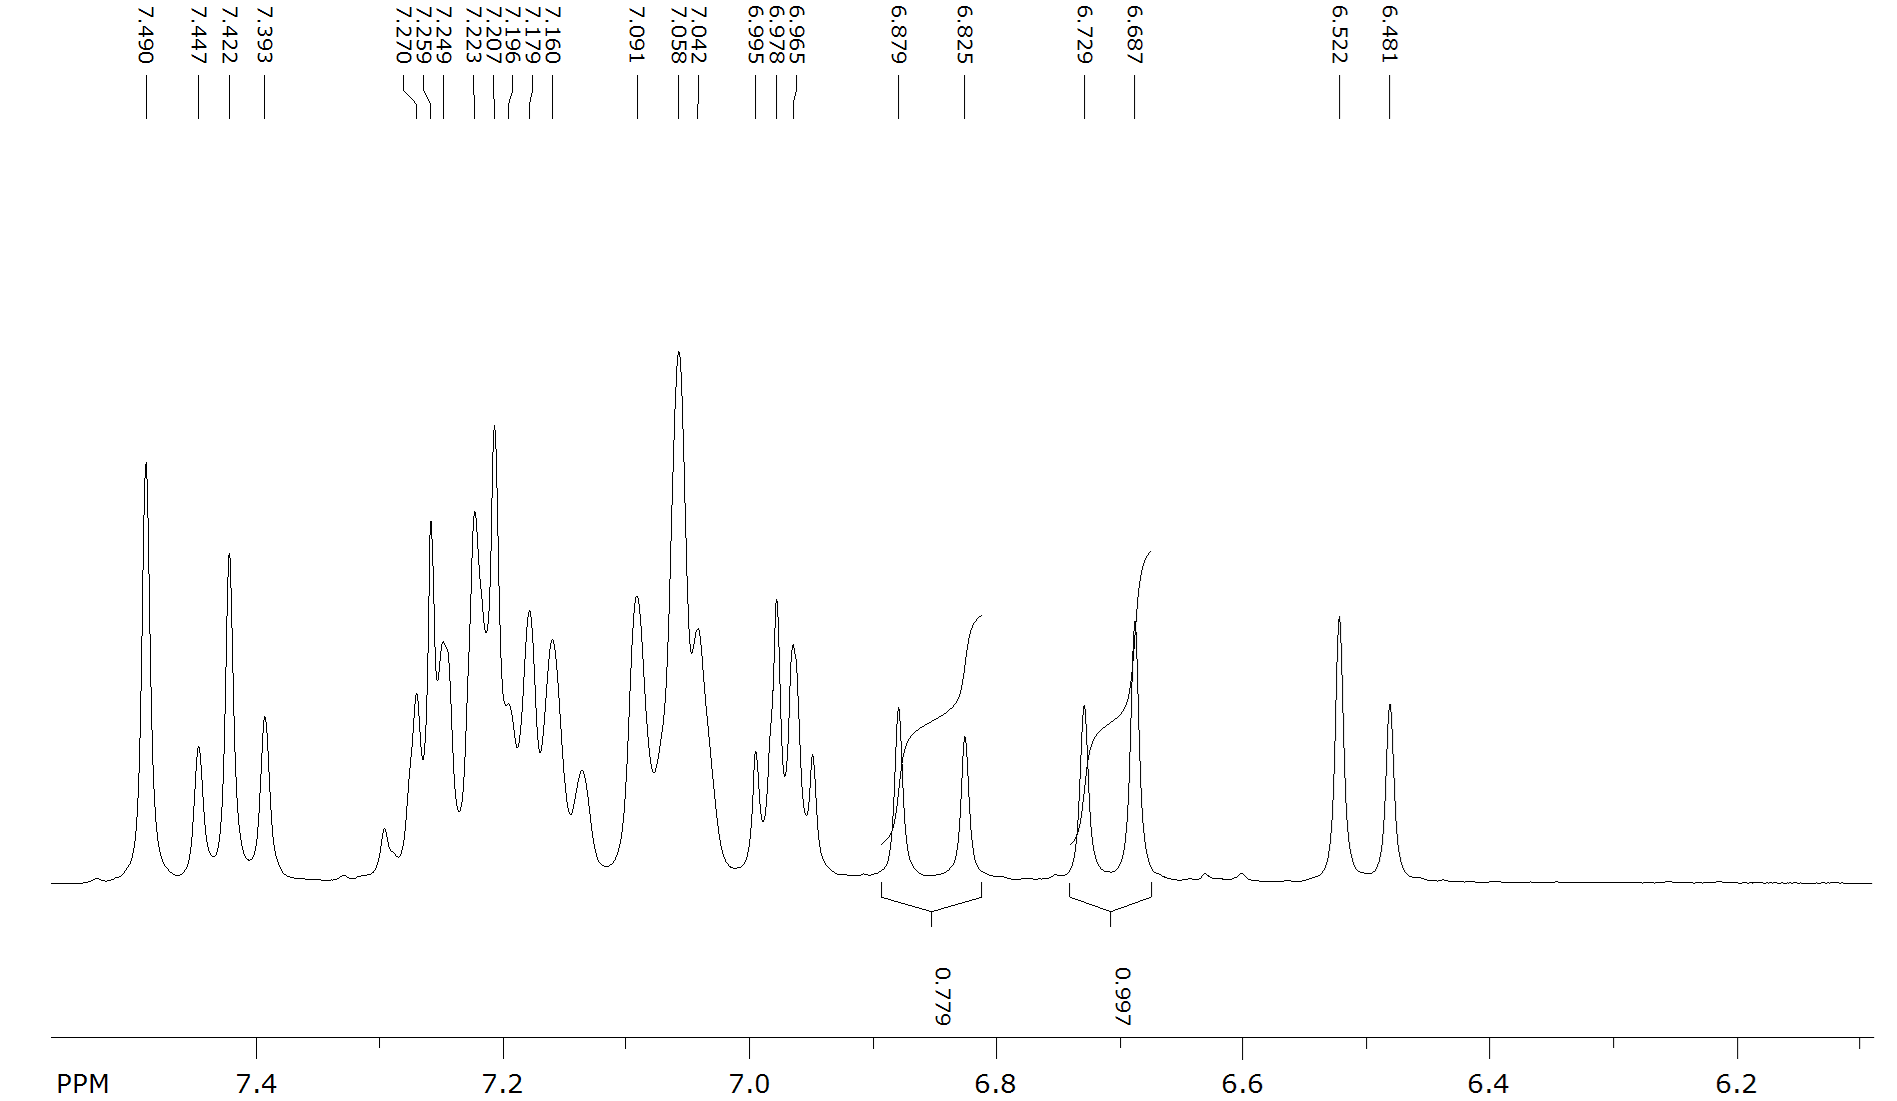


**Figure S16.** Unsaturated part of the 1H NMR (CDCl3) spectrum of a mixture of isomers of **8**.


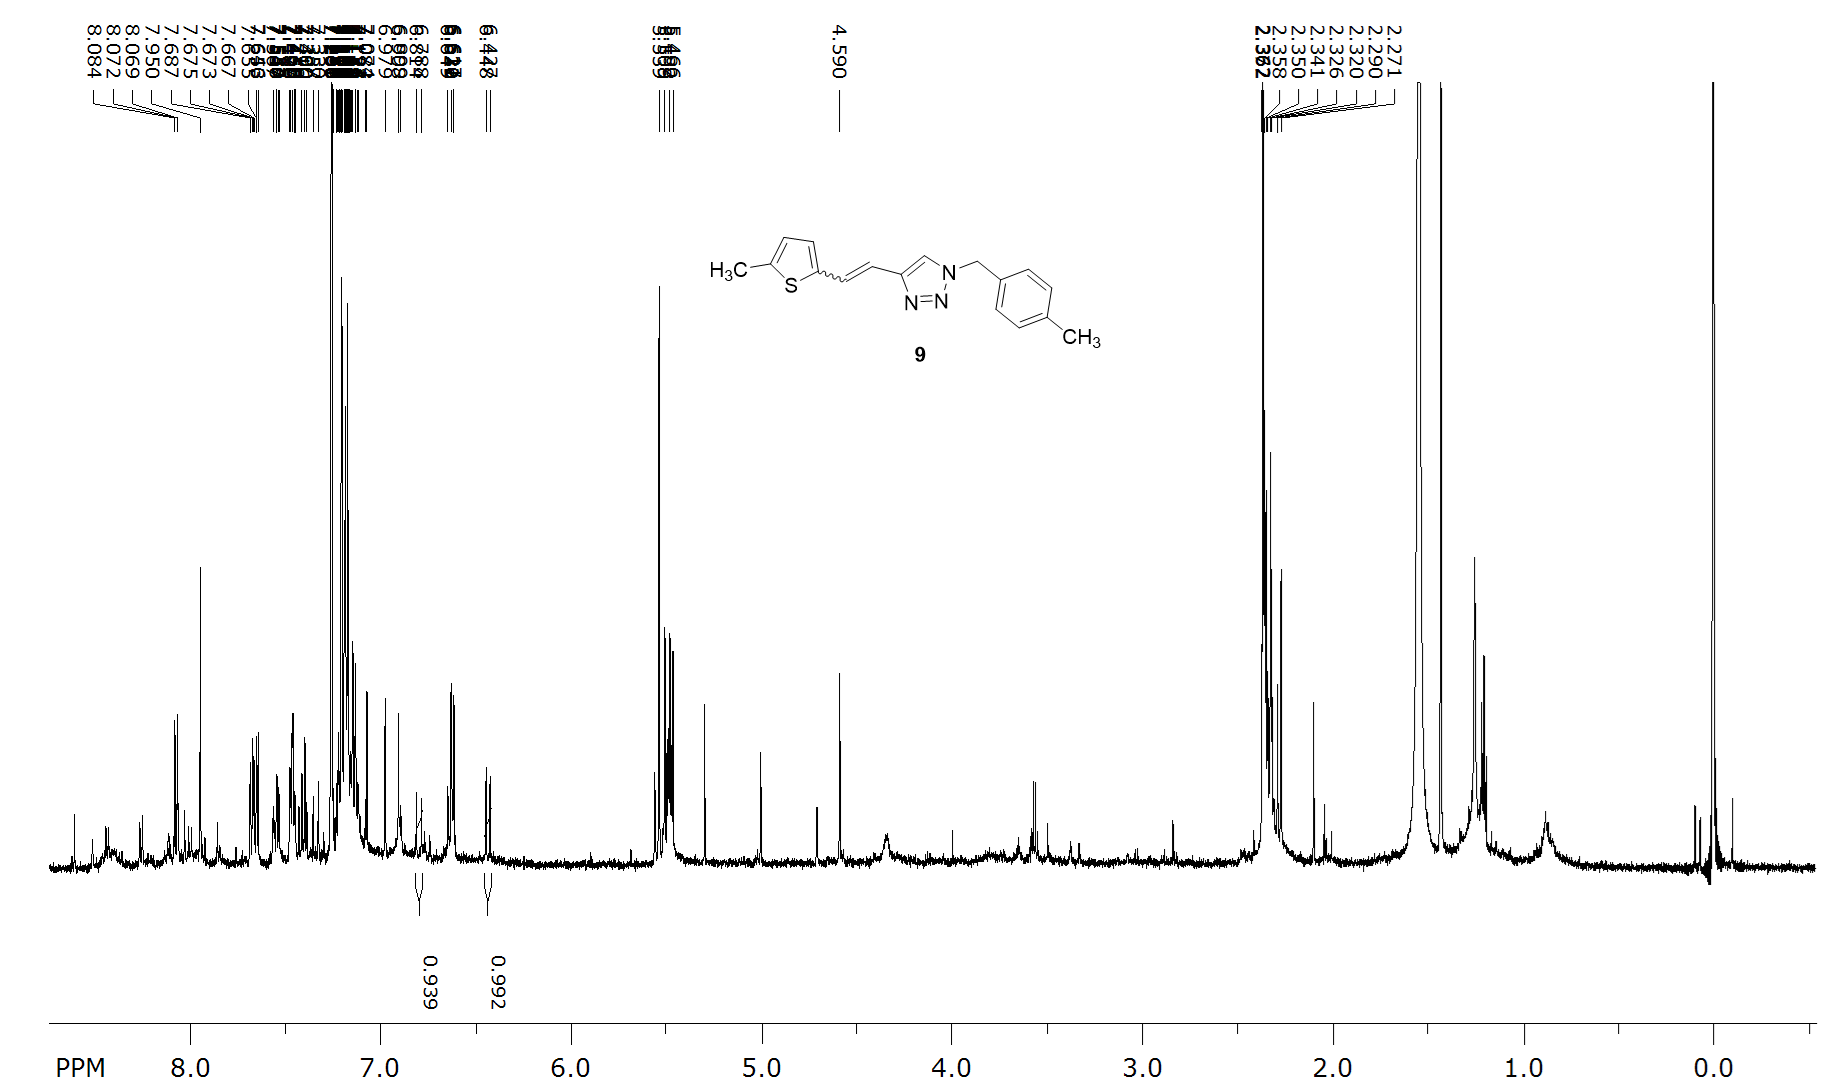


**Figure S17.** 1H NMR (CDCl3) spectrum of a mixture of isomers of **9**.


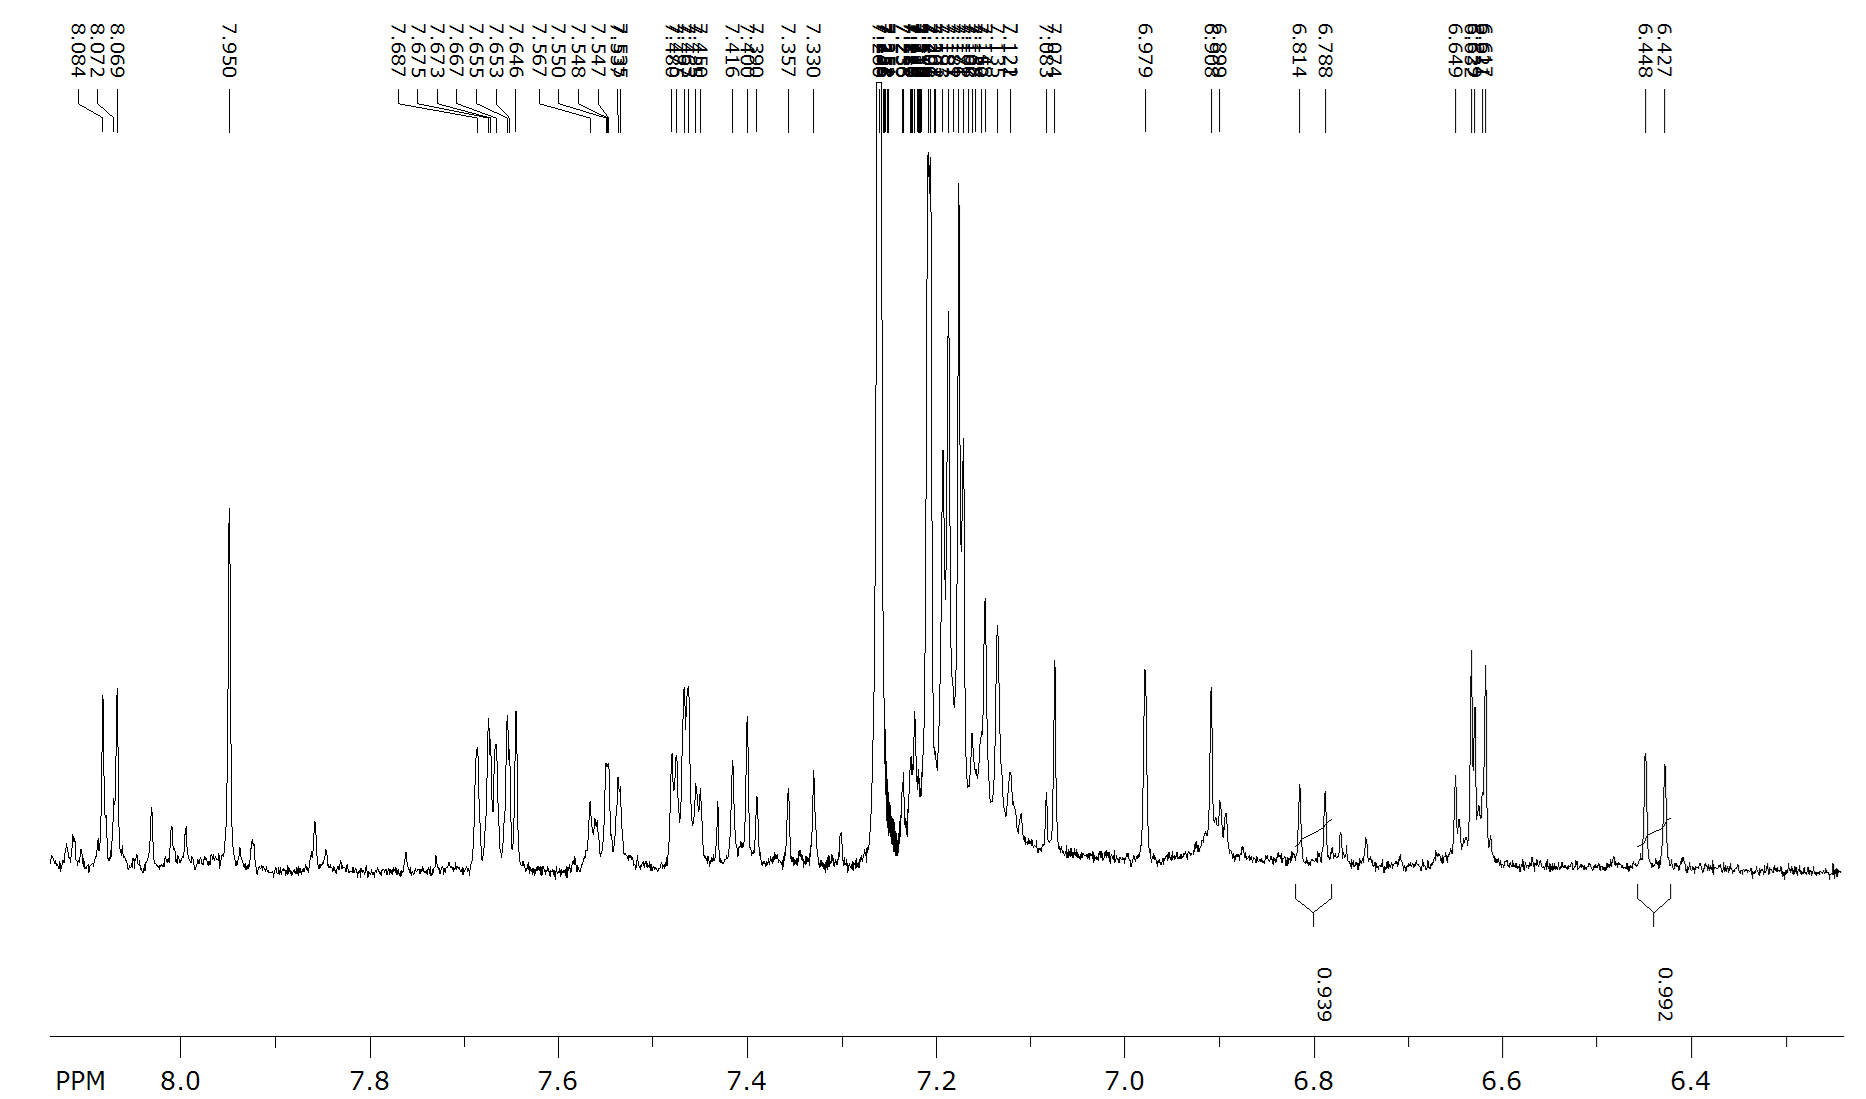


**Figure S18.** Unsaturated part of the 1H NMR (CDCl3) spectrum of a mixture of isomers of **9**.


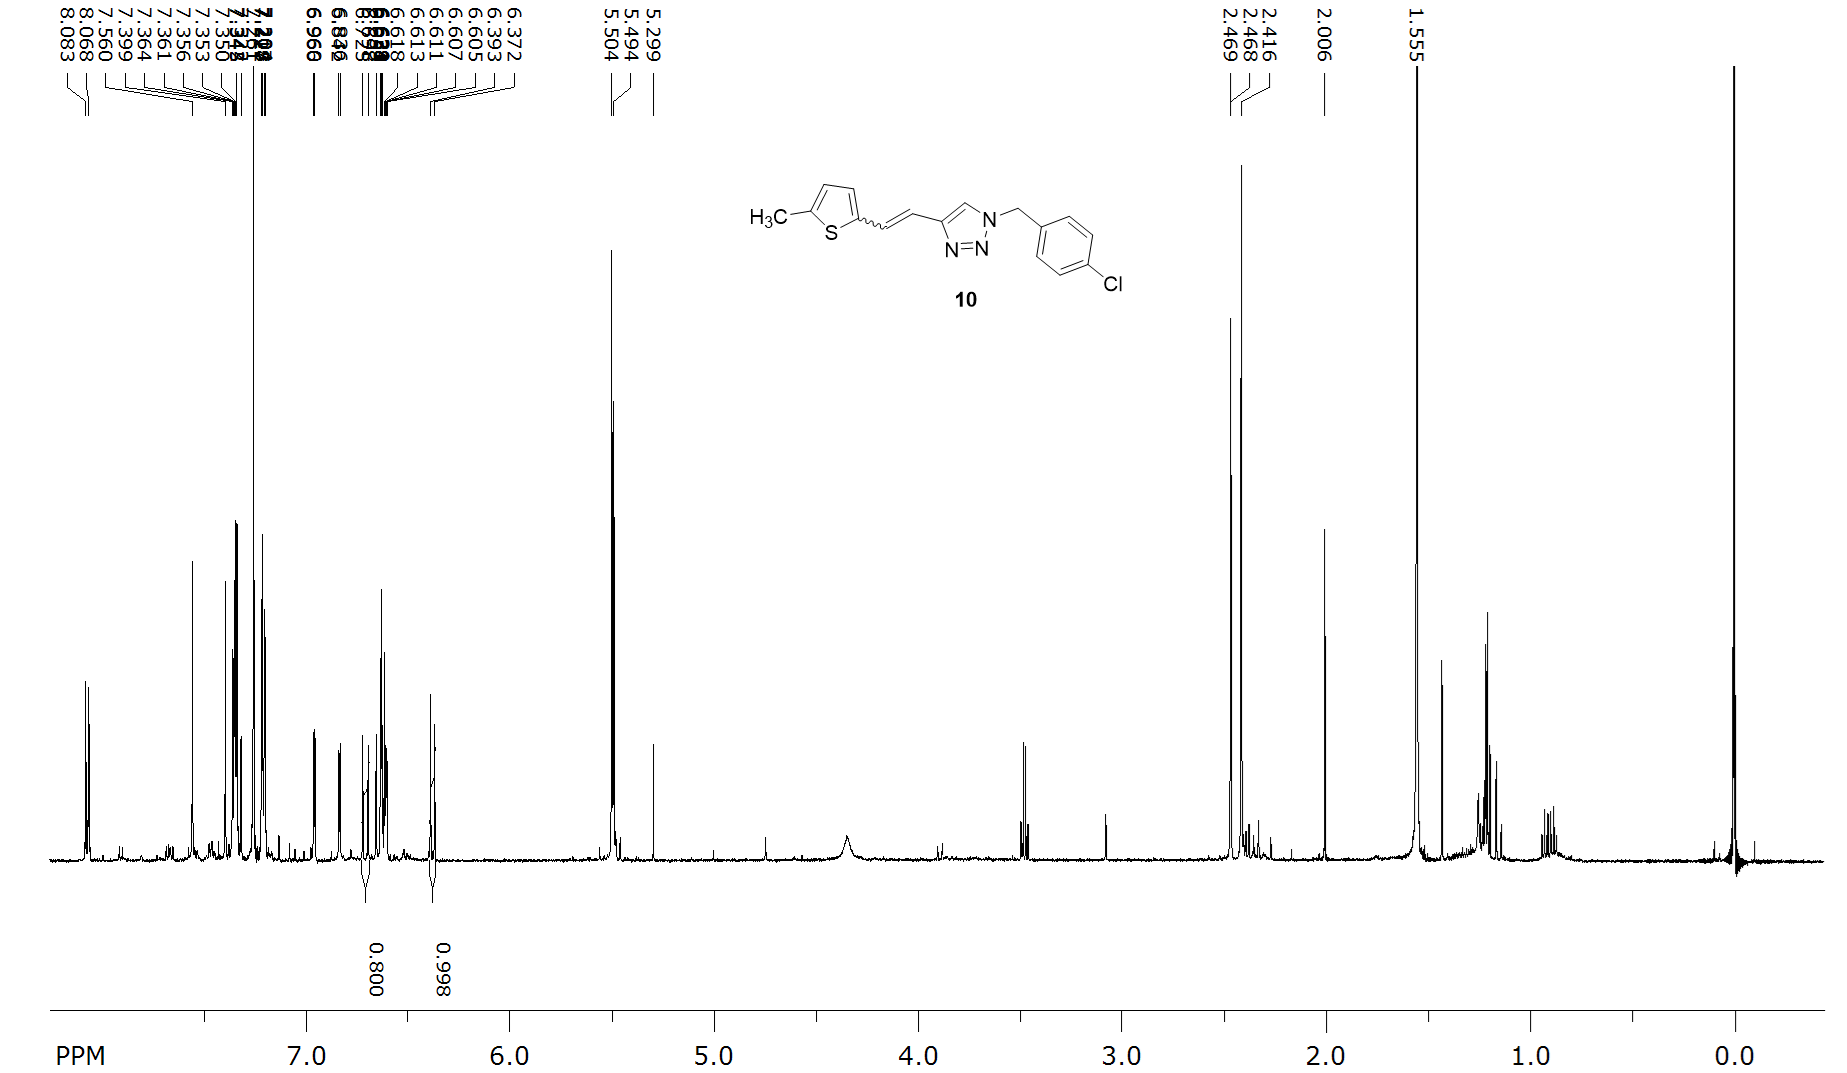


**Figure S19.** 1H NMR (CDCl3) spectrum of a mixture of isomers of **10**.


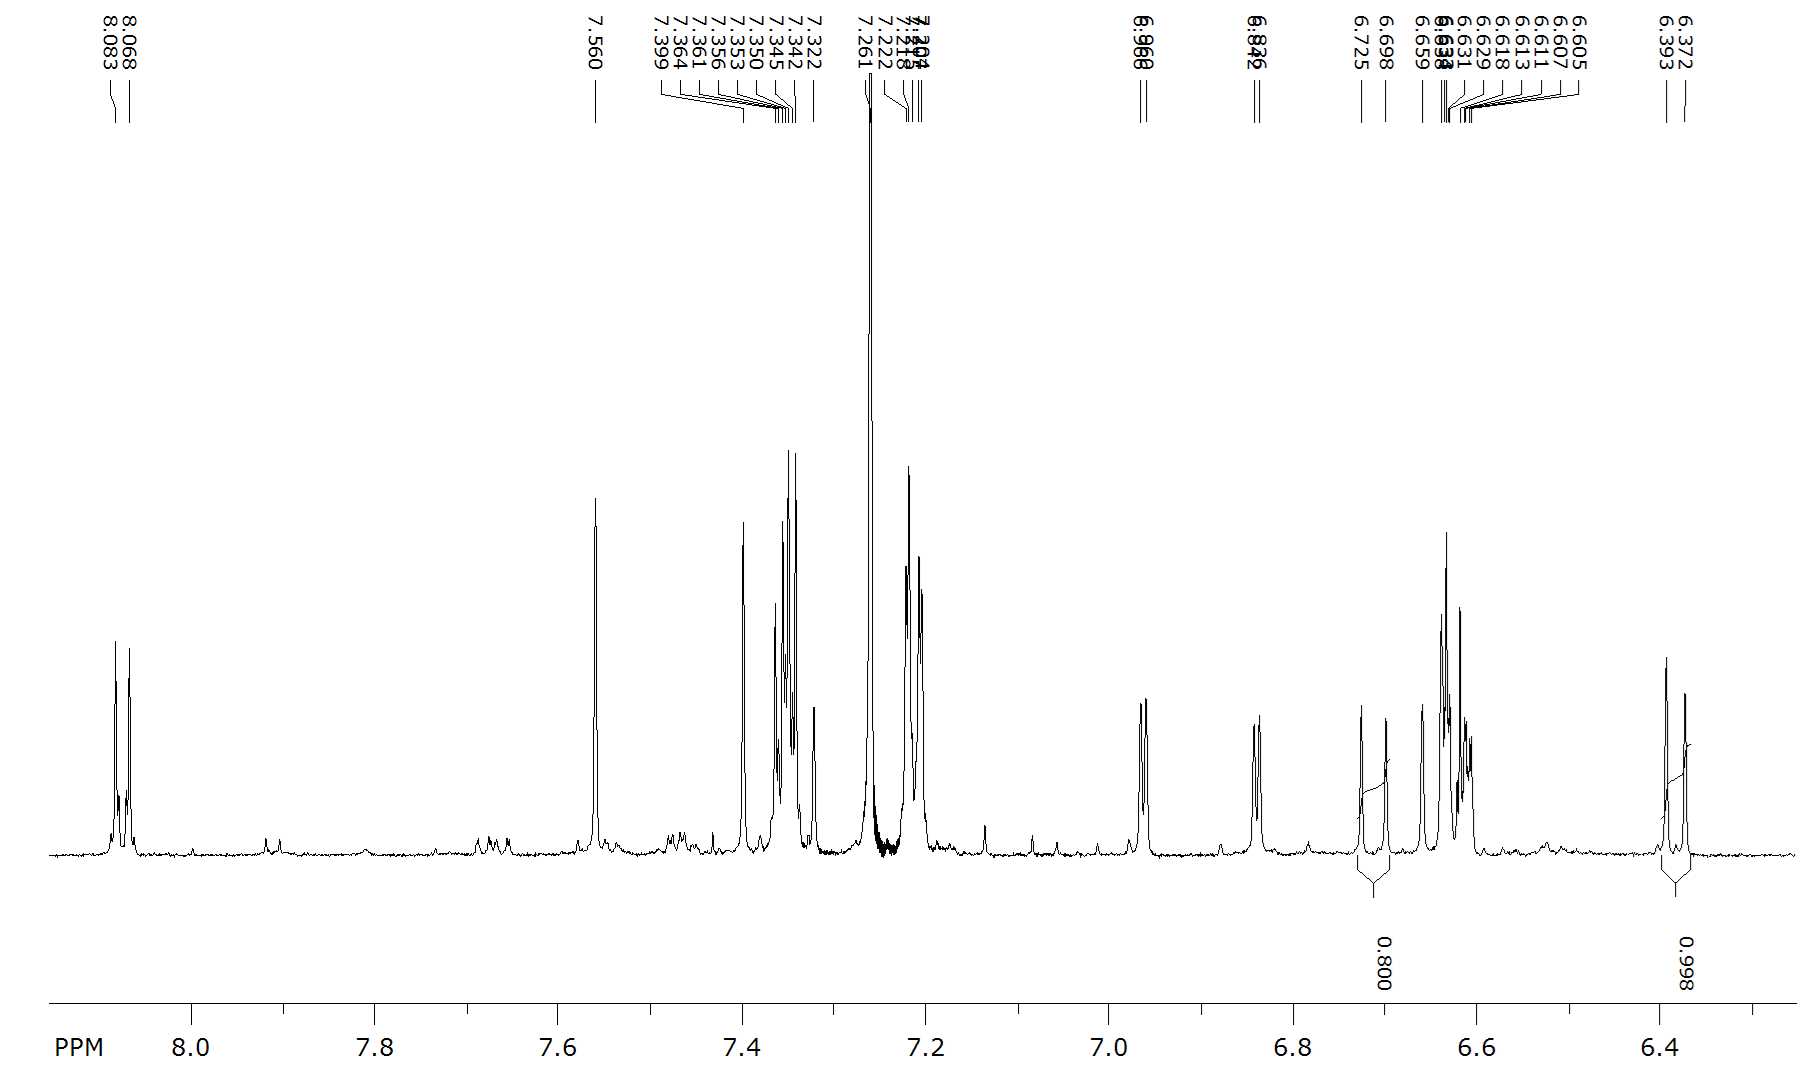


**Figure S20.** Unsaturated part of the 1H NMR (CDCl3) spectrum of a mixture of isomers of **10**.


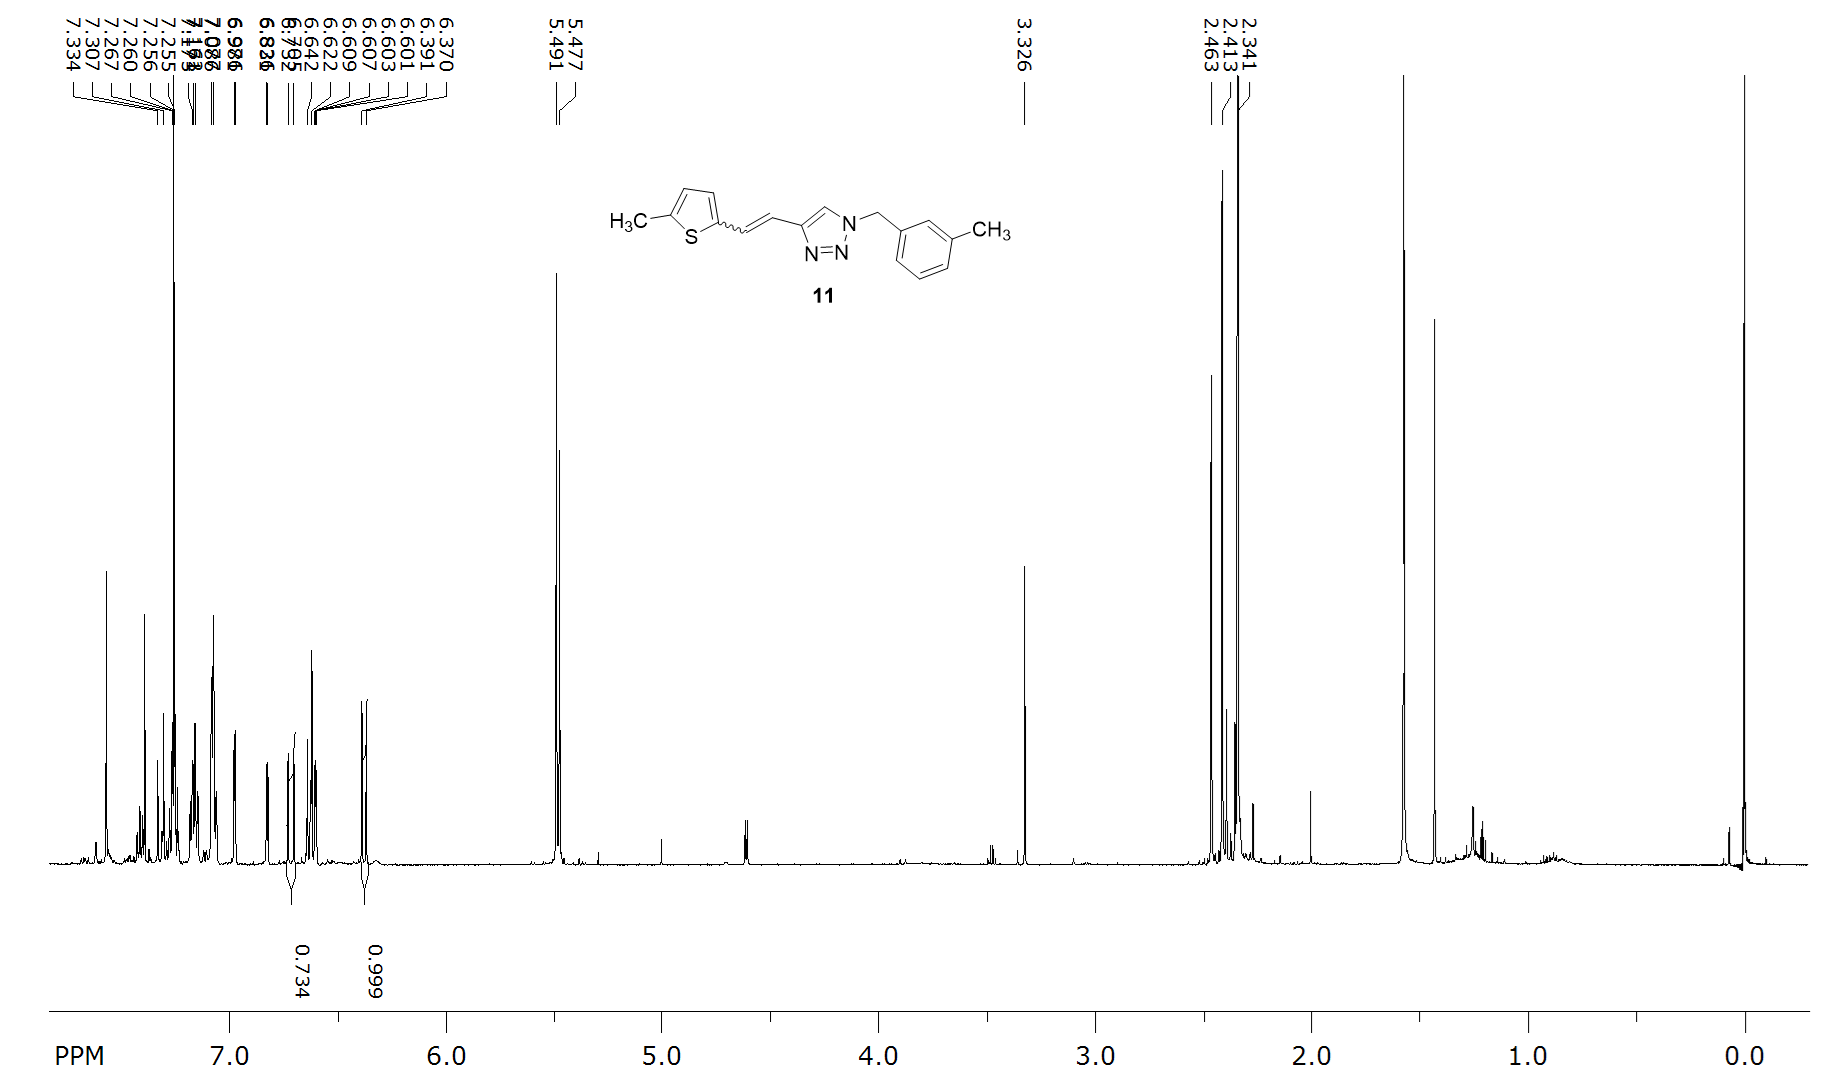


**Figure S21.** 1H NMR (CDCl3) spectrum of a mixture of isomers of **11**.


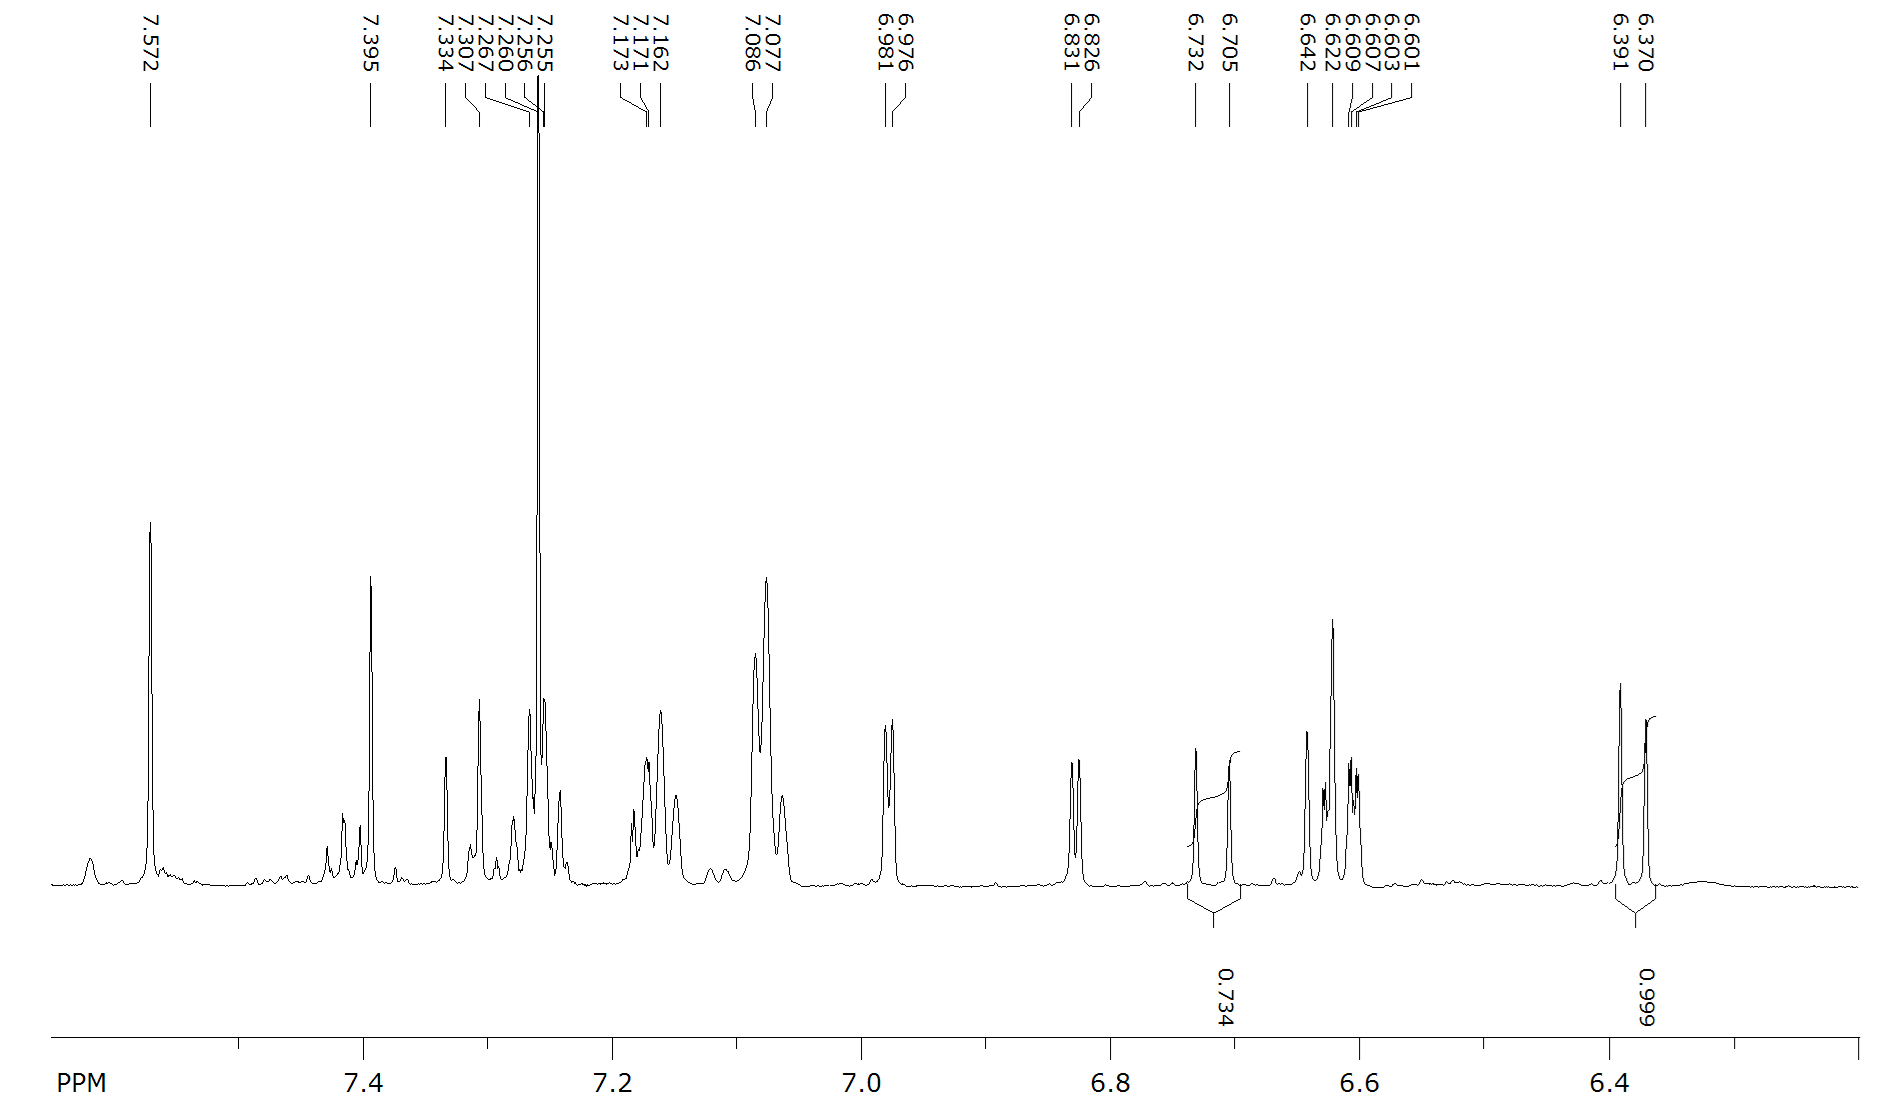


**Figure S22.** Unsaturated part of the 1H NMR (CDCl3) spectrum of a mixture of isomers of **11**.


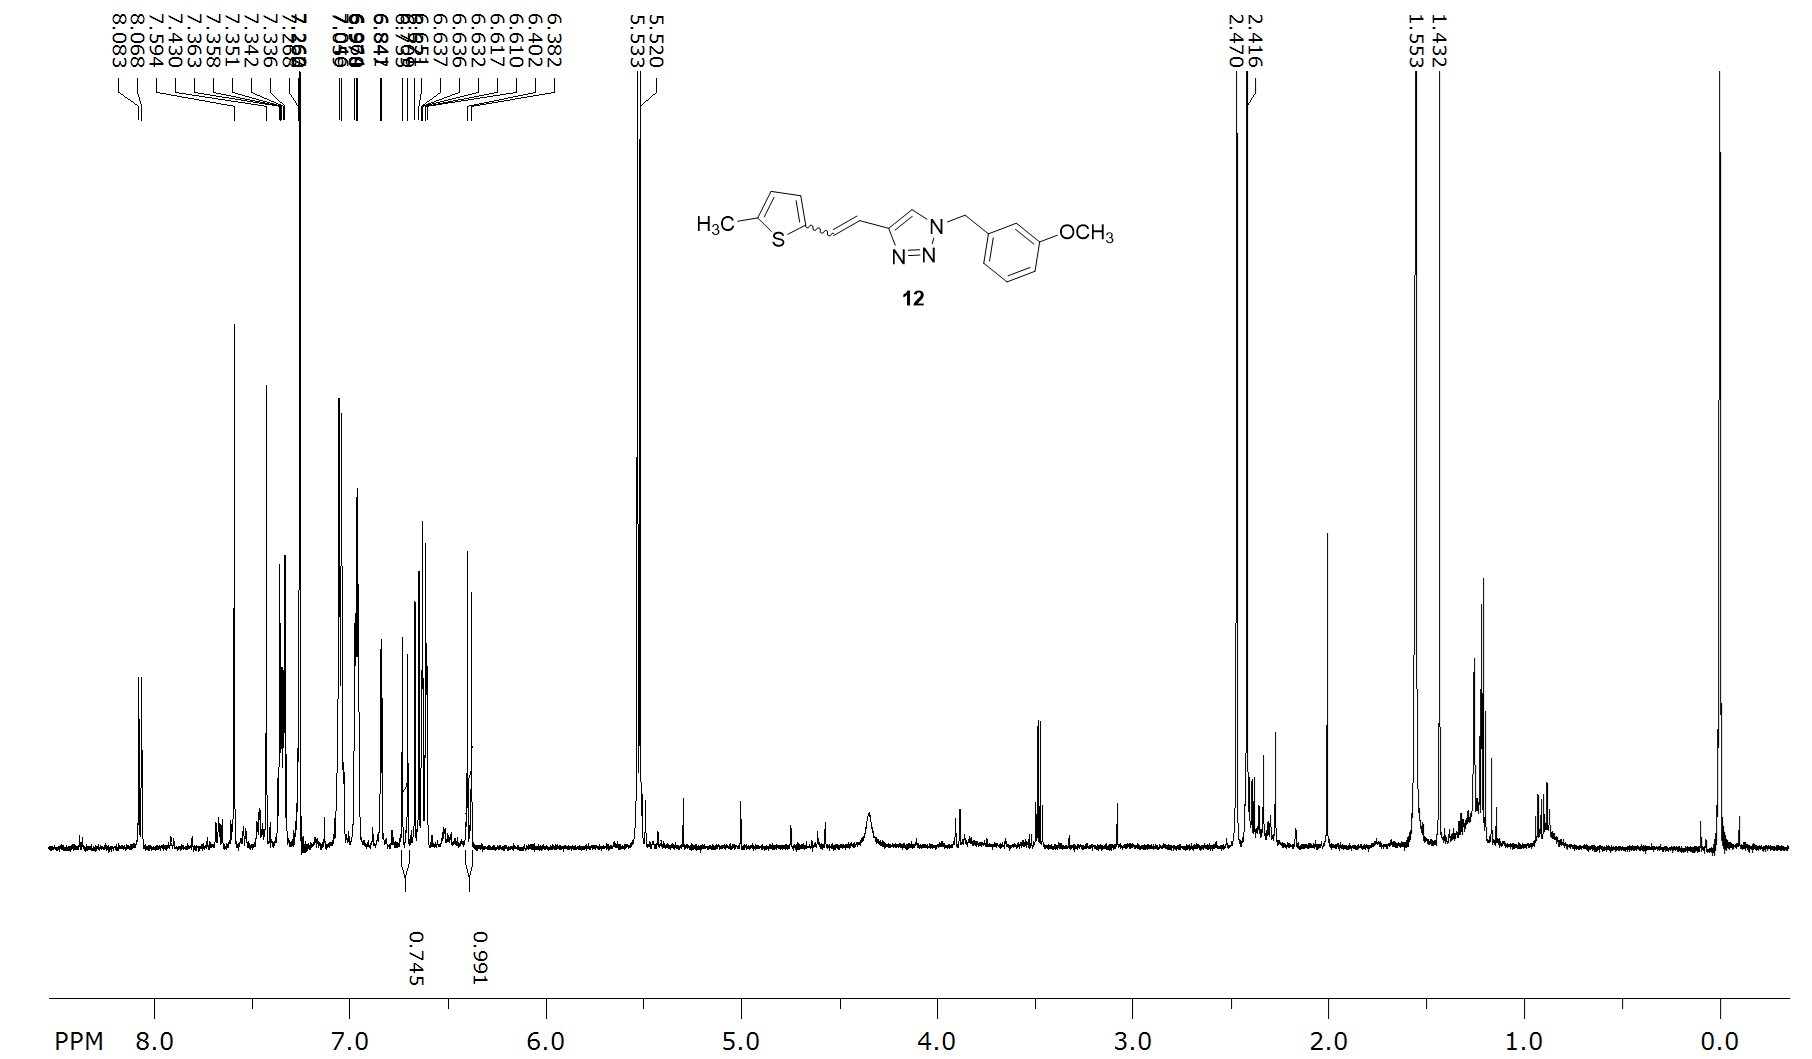


**Figure S23.** 1H NMR (CDCl3) spectrum of a mixture of isomers of **12**.


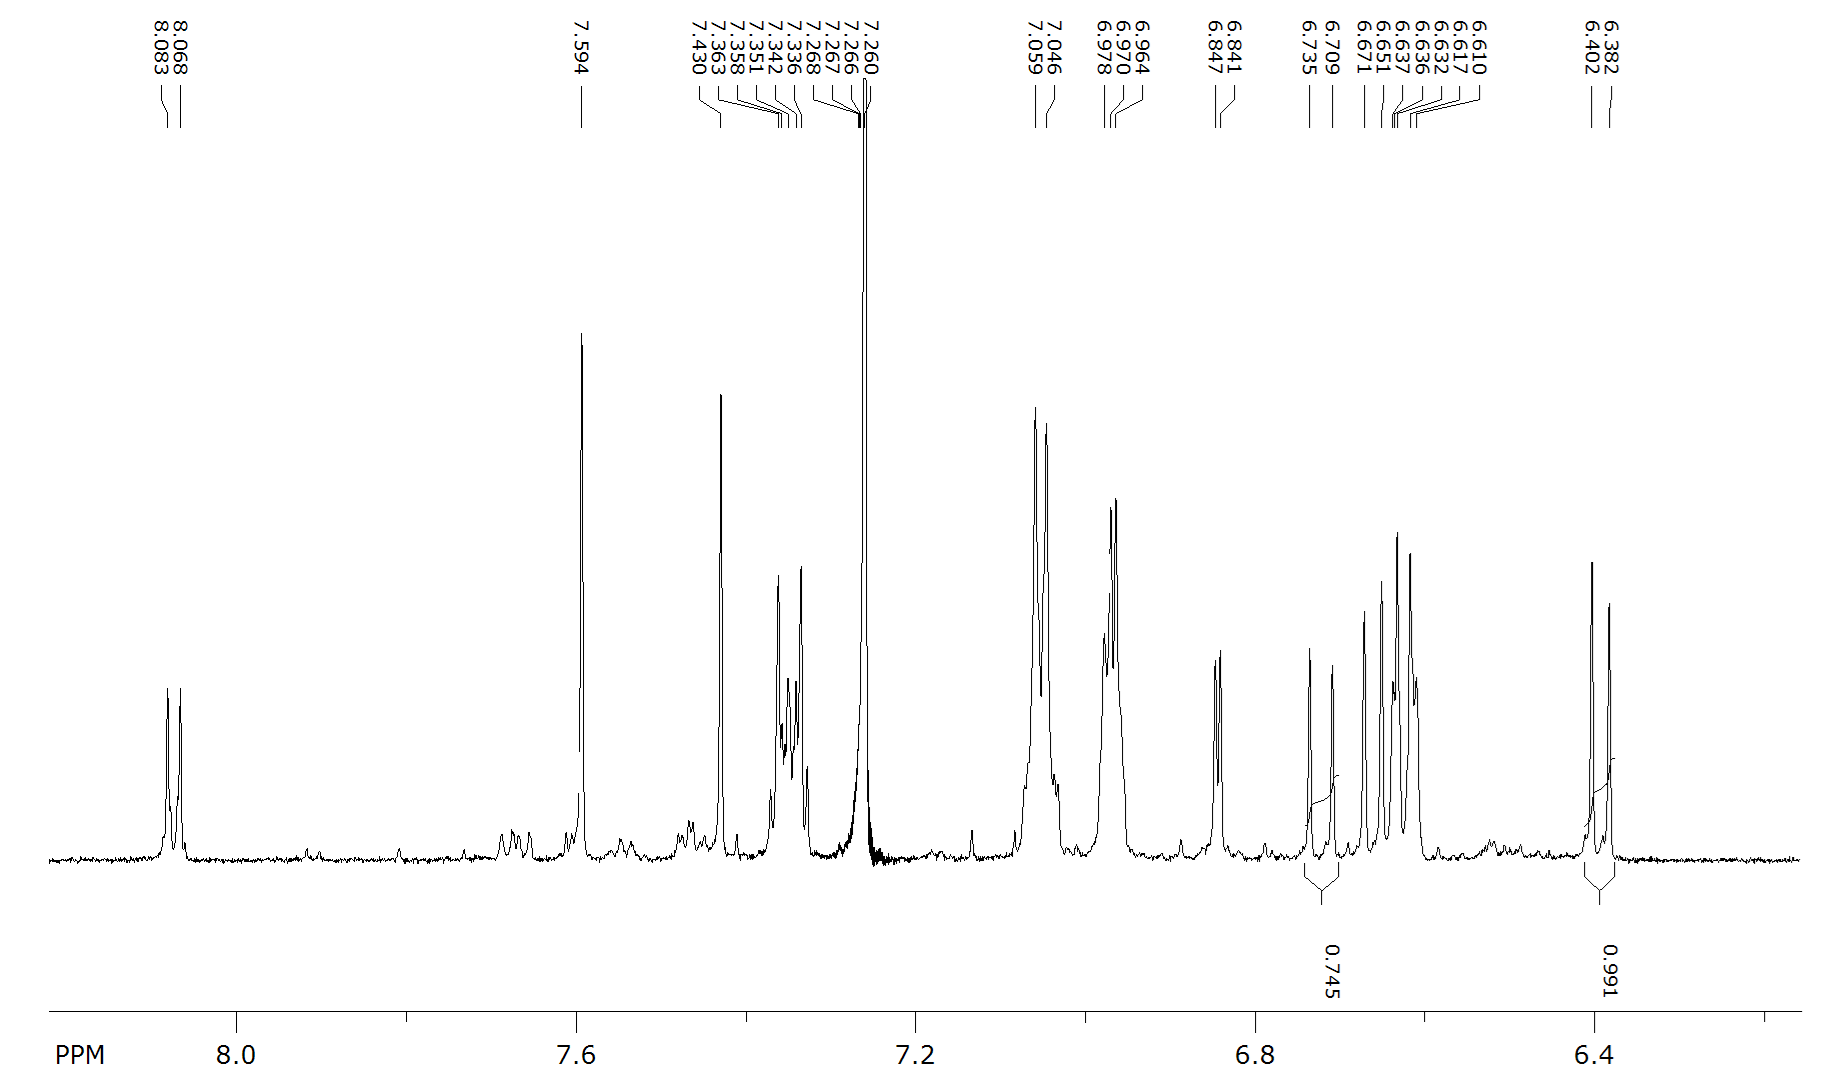


**Figure S24.** Unsaturated part of the 1H NMR (CDCl3) spectrum of a mixture of isomers of **12**.


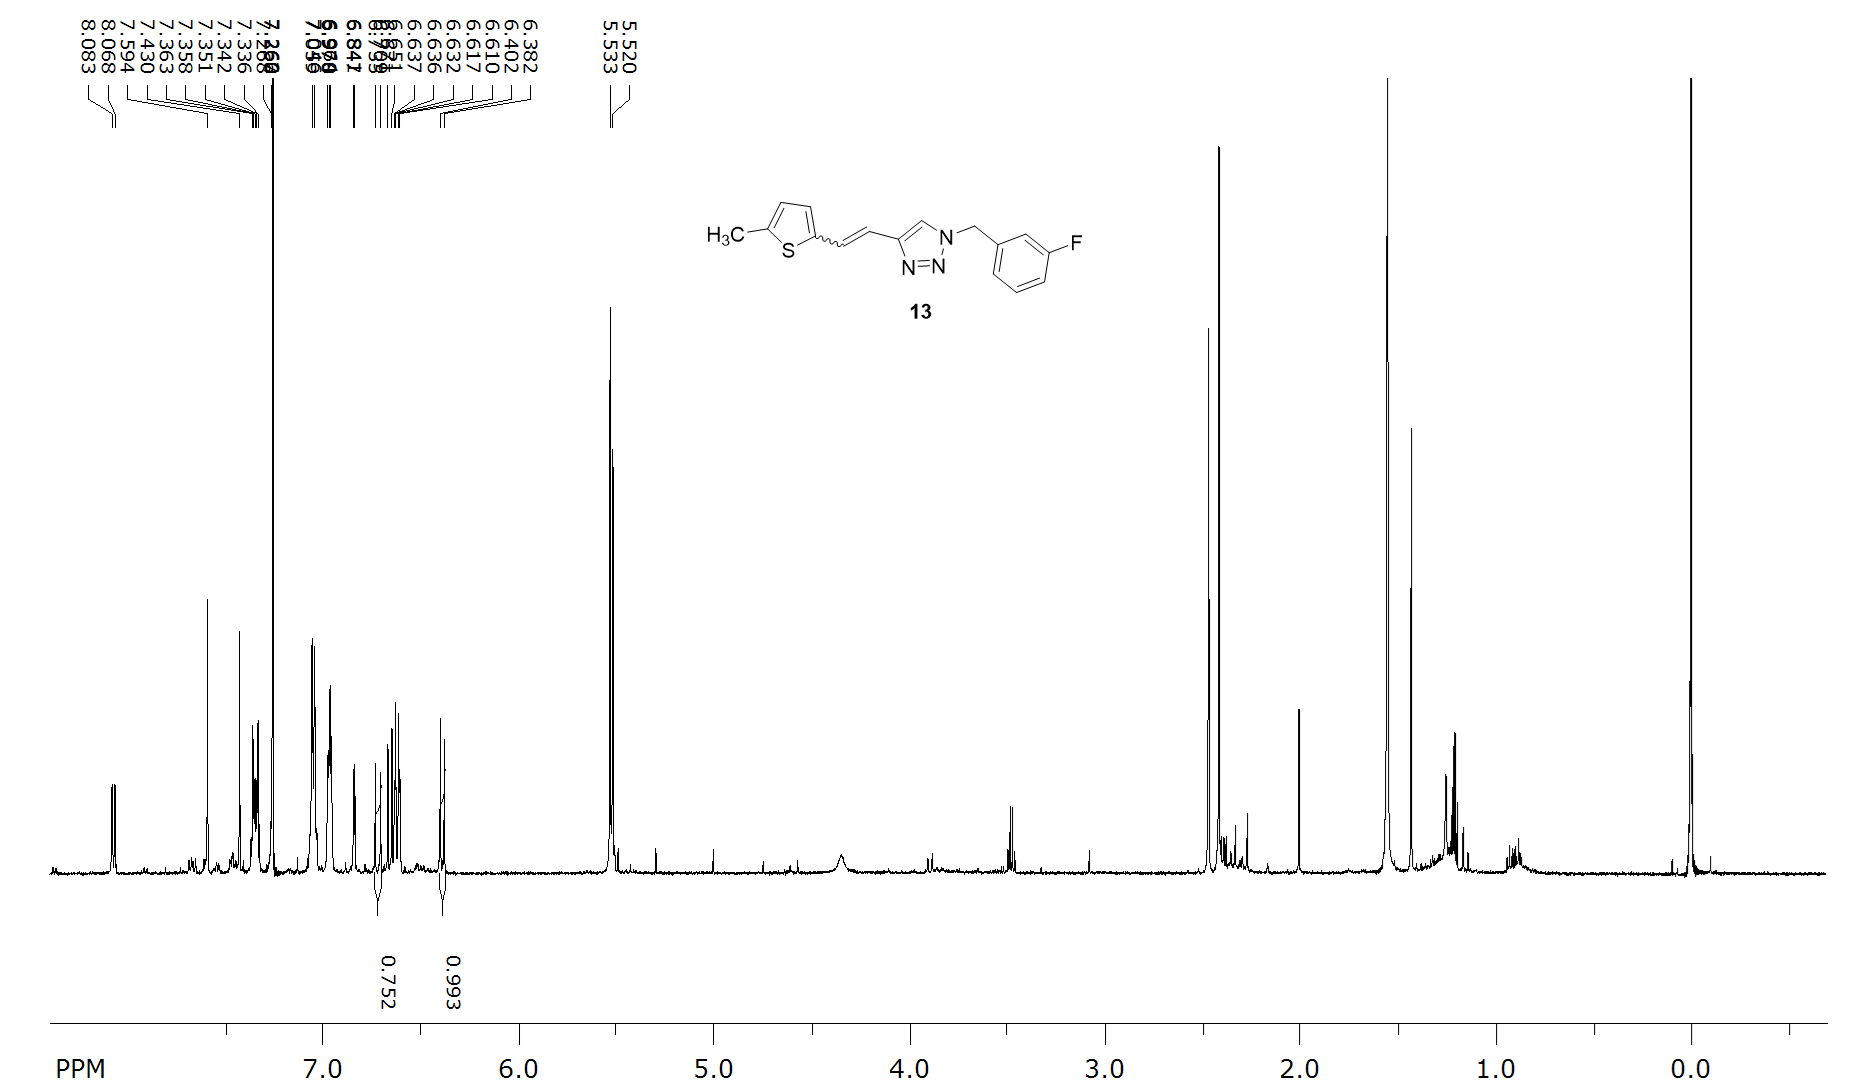


**Figure S25.** 1H NMR (CDCl3) spectrum of a mixture of isomers of **13**.


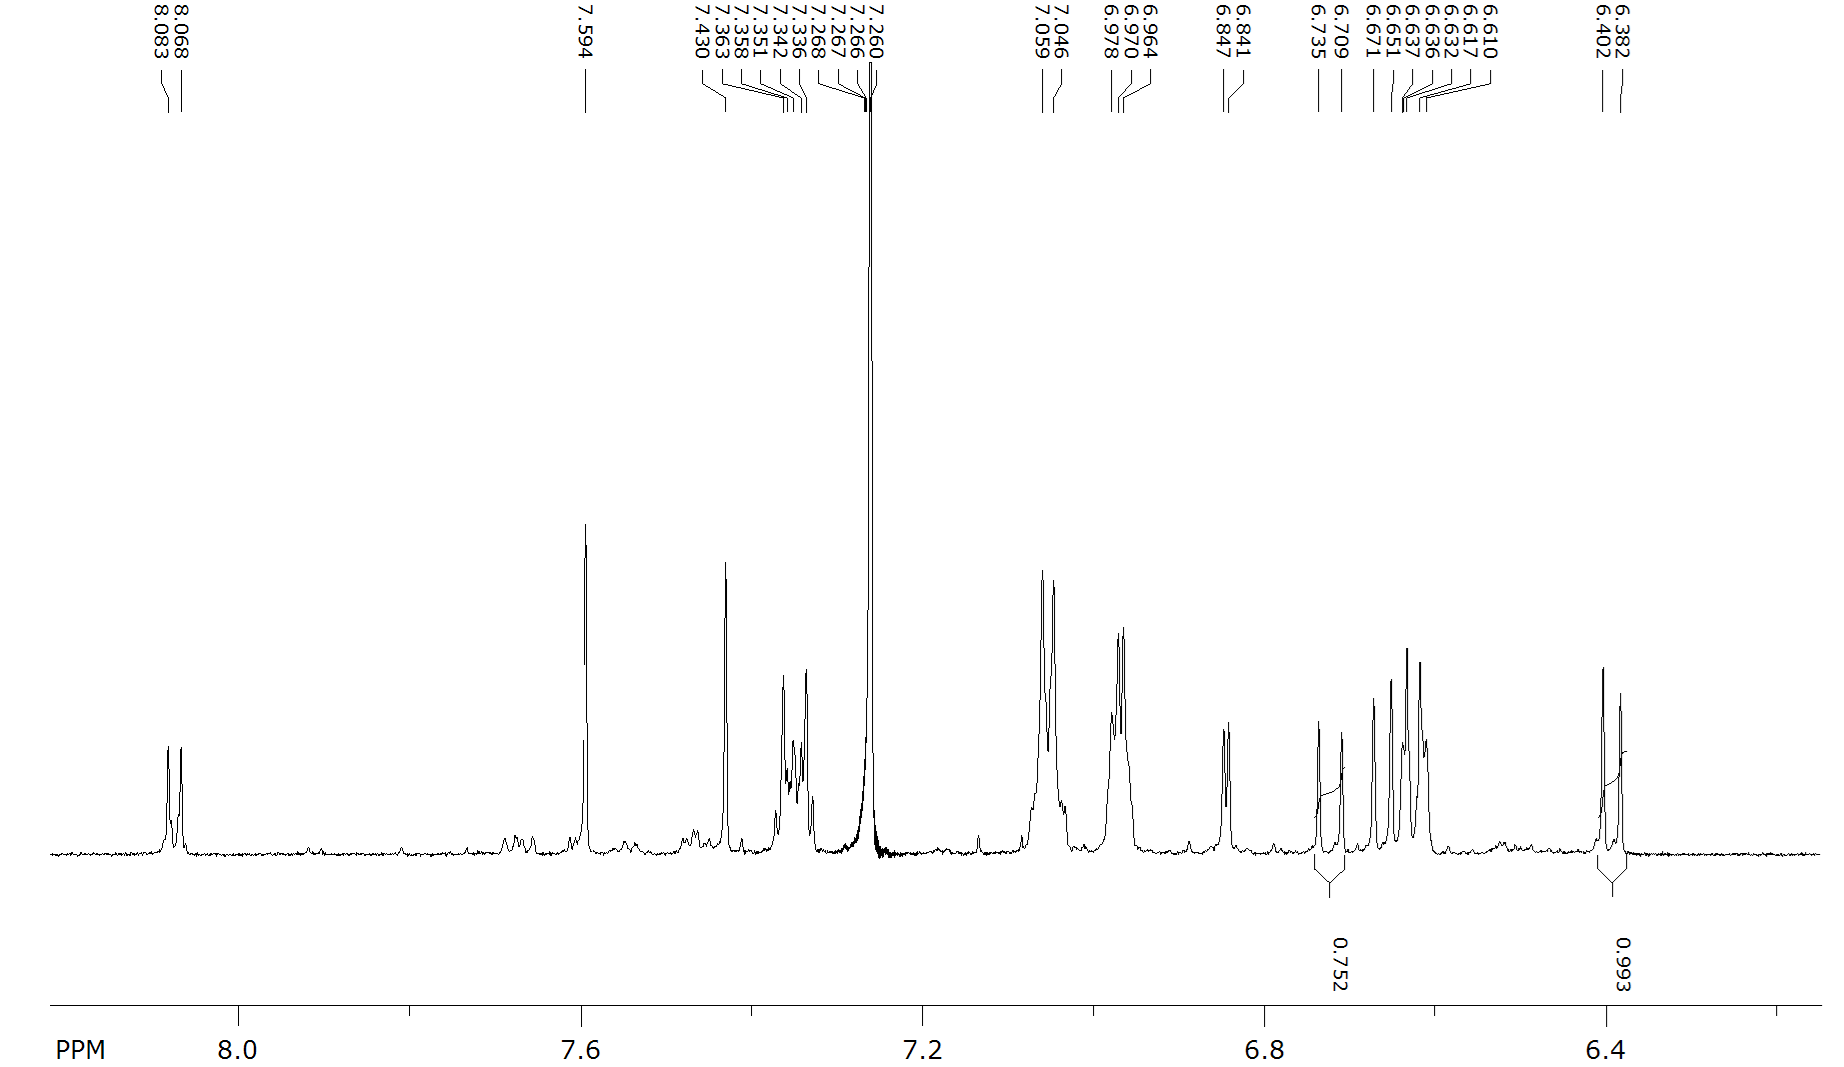


**Figure S26.** Unsaturated part of the 1H NMR (CDCl3) spectrum of a mixture of isomers of **13**.


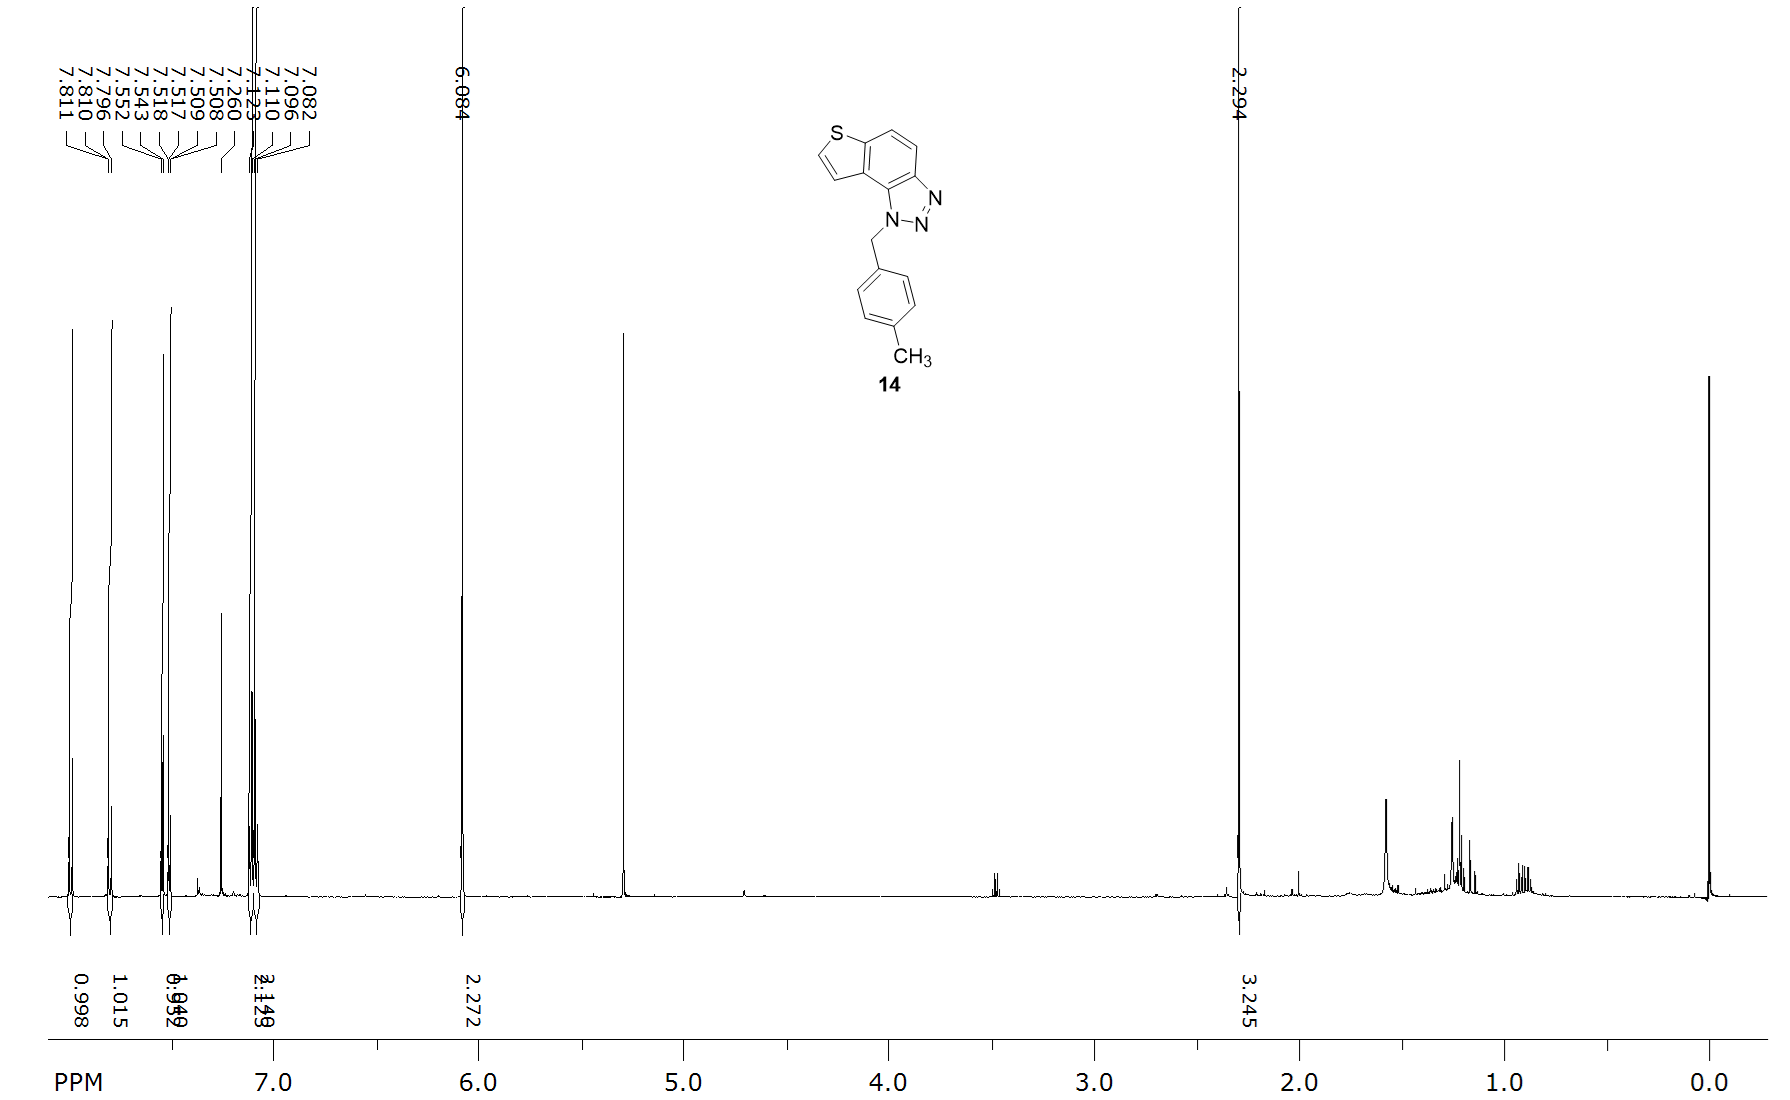


**Figure S27.** 1H NMR (CDCl3) spectrum of **14**.


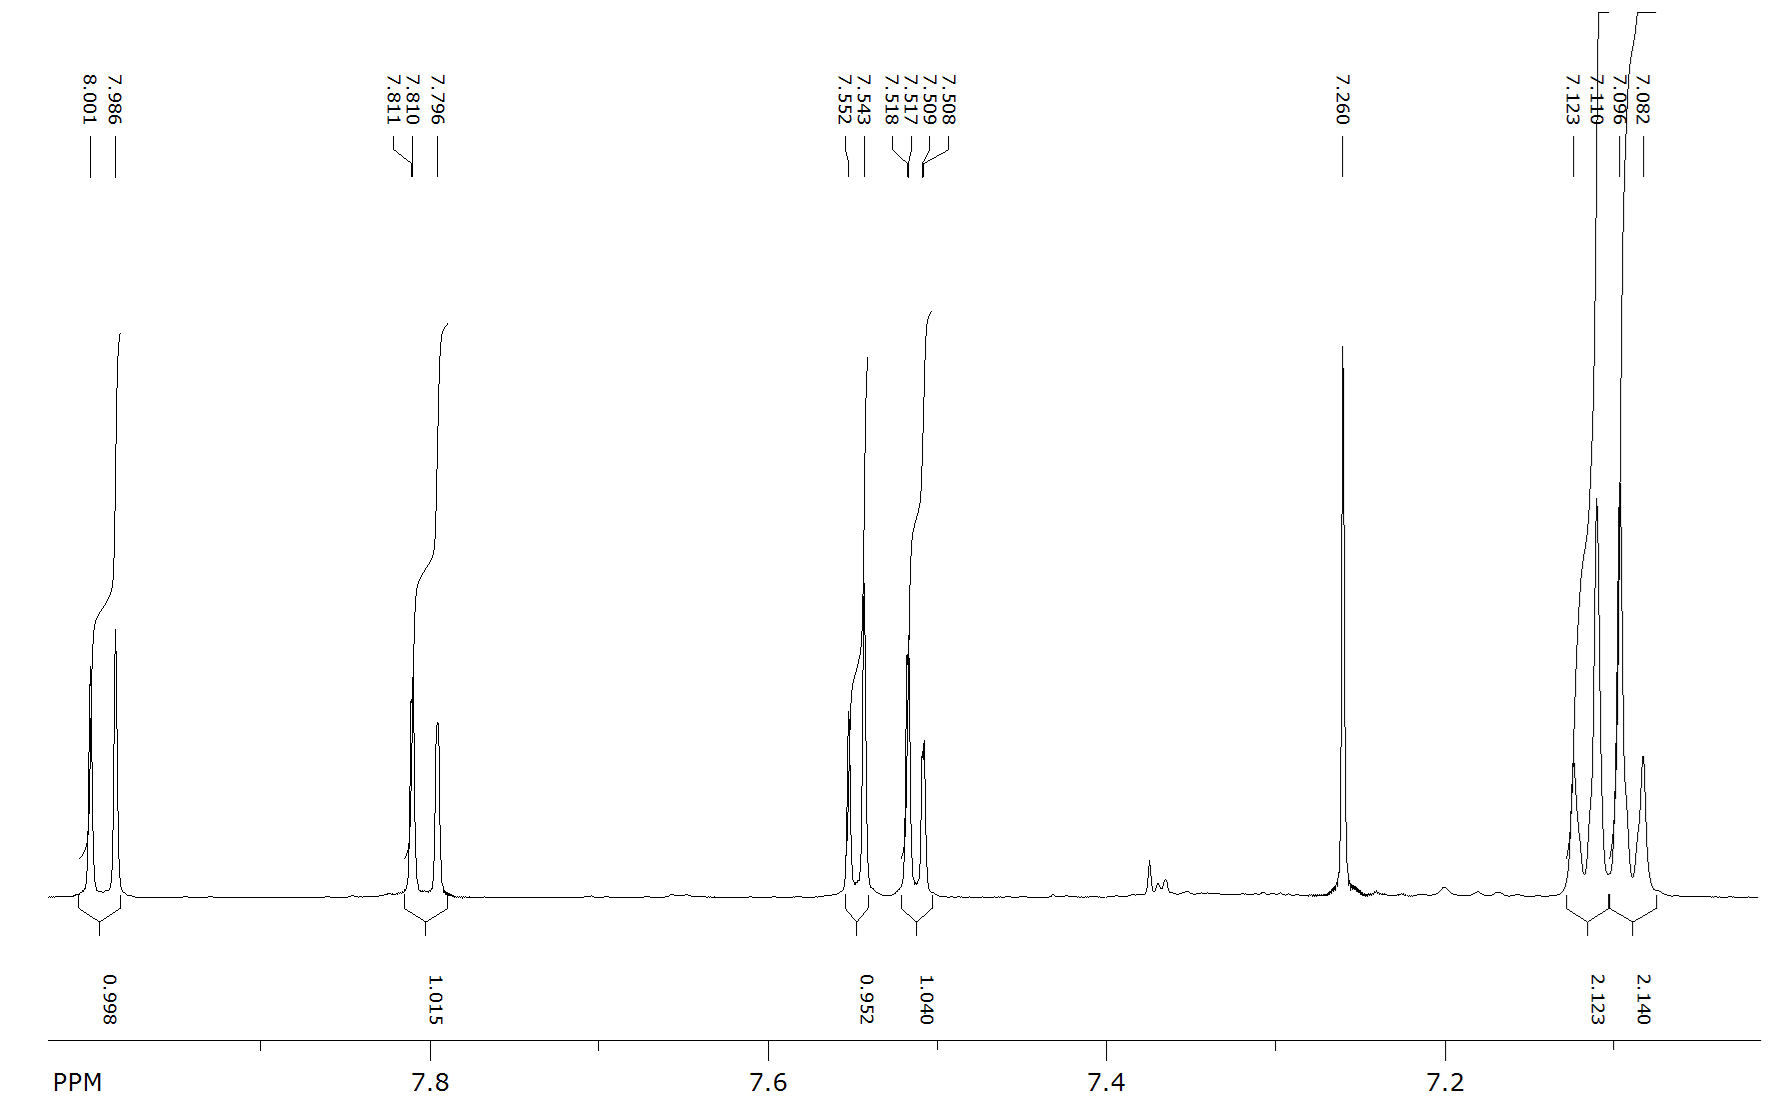


**Figure S28.** Aromatic part of the 1H NMR (CDCl3) spectrum of **14**.


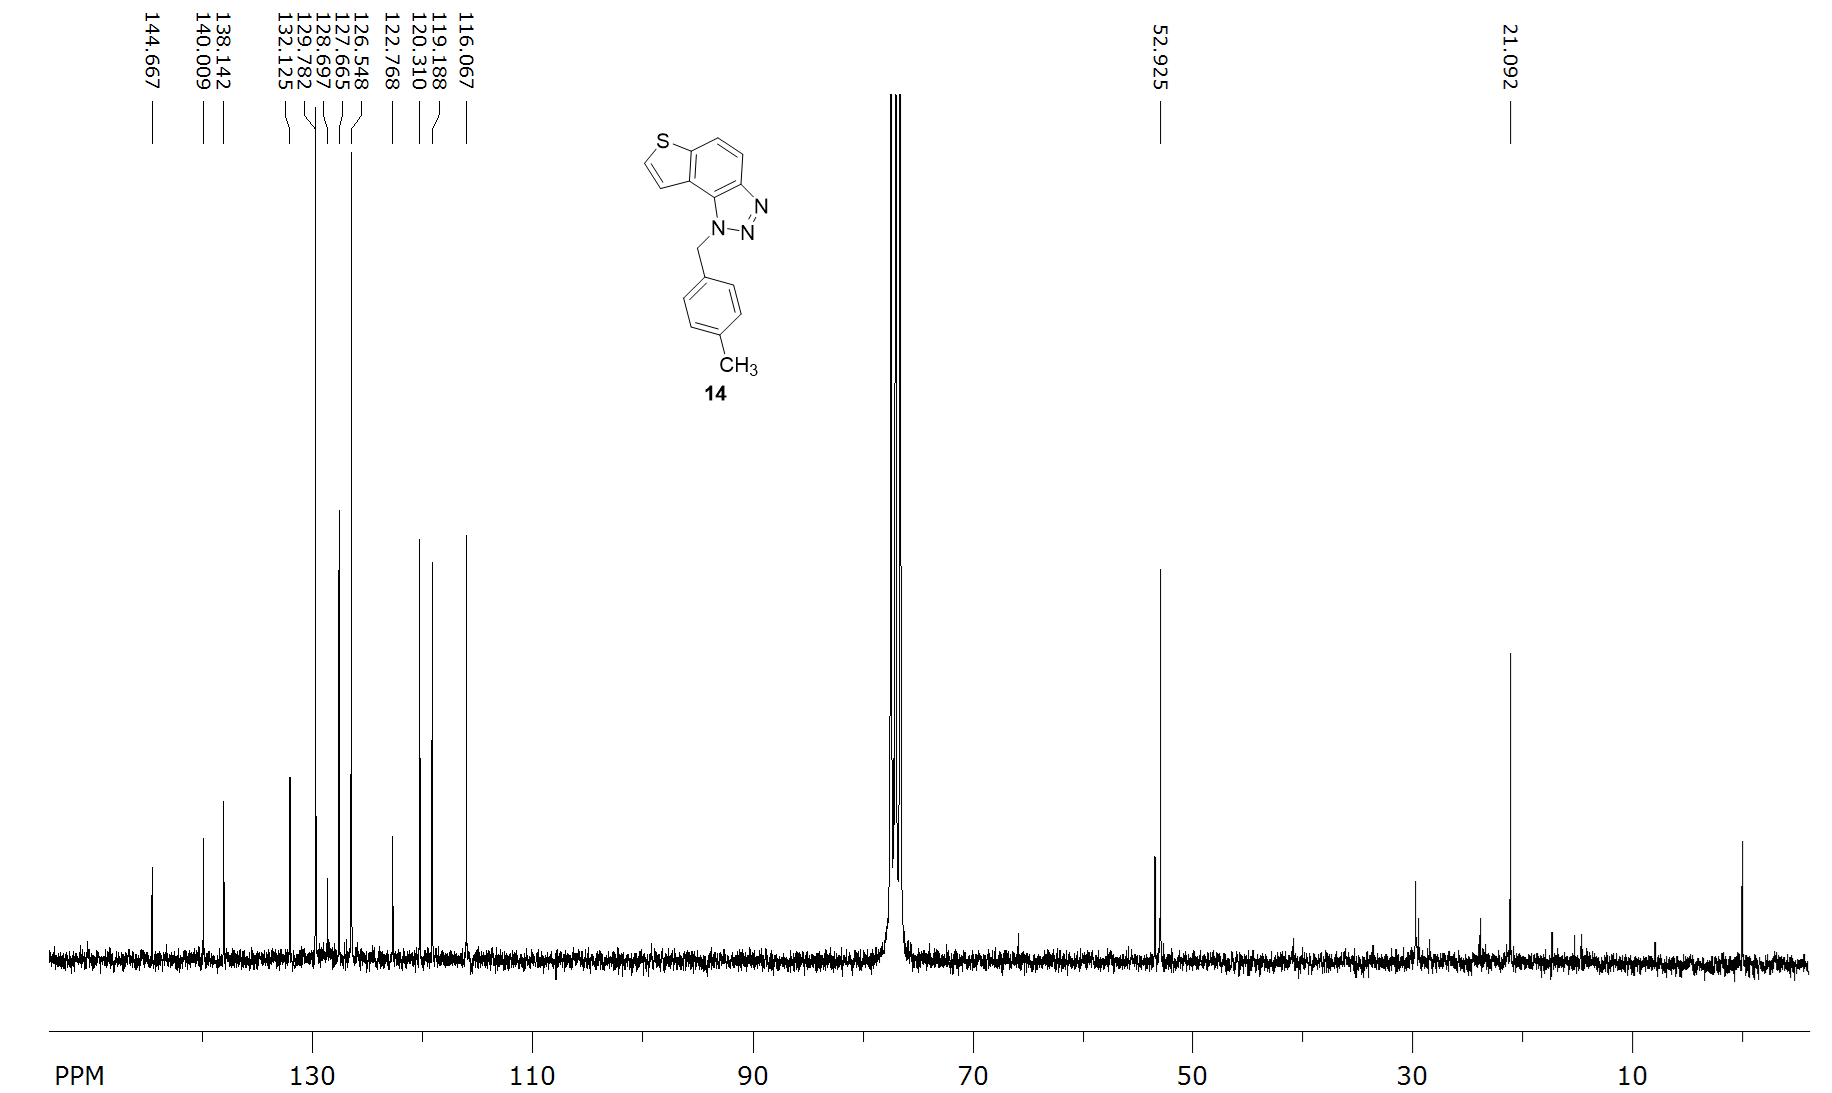


**Figure S29.** 13C NMR (CDCl3) spectrum of **14**.


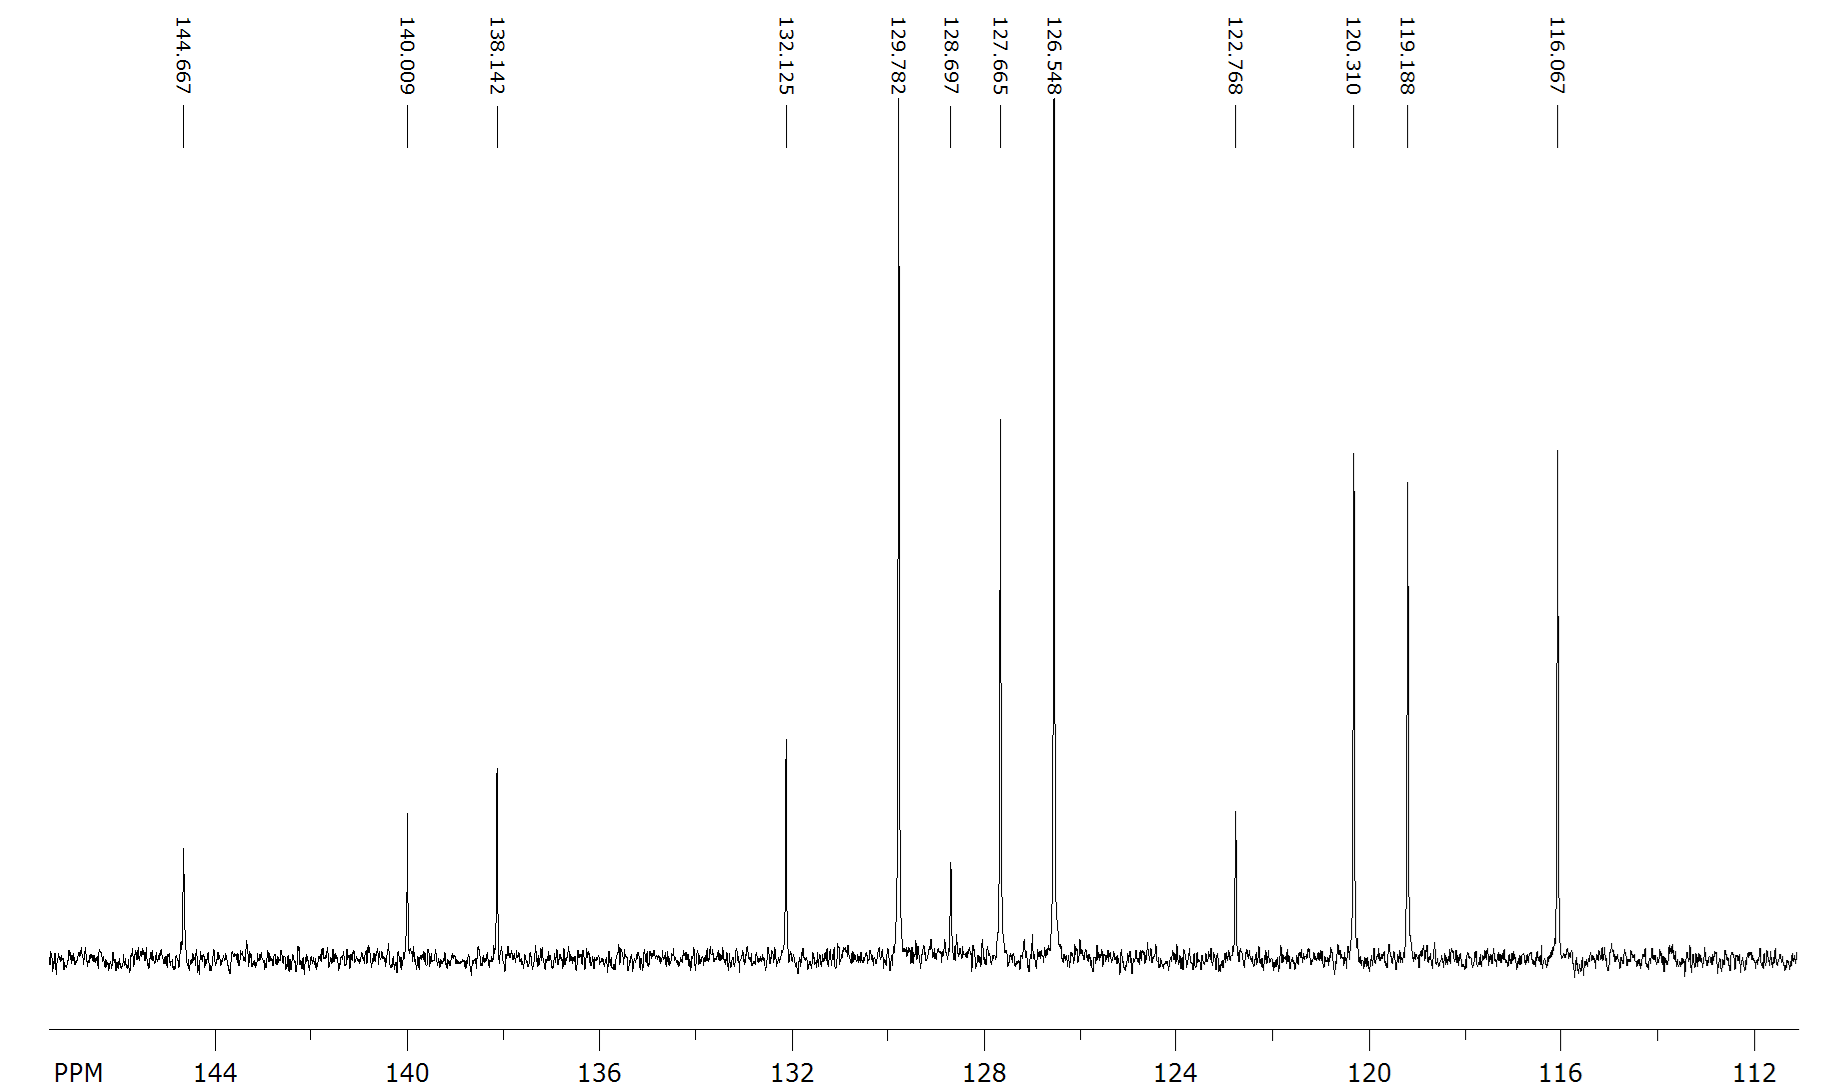


**Figure S30.** Aromatic part of the 13C NMR (CDCl3) spectrum of **14**.


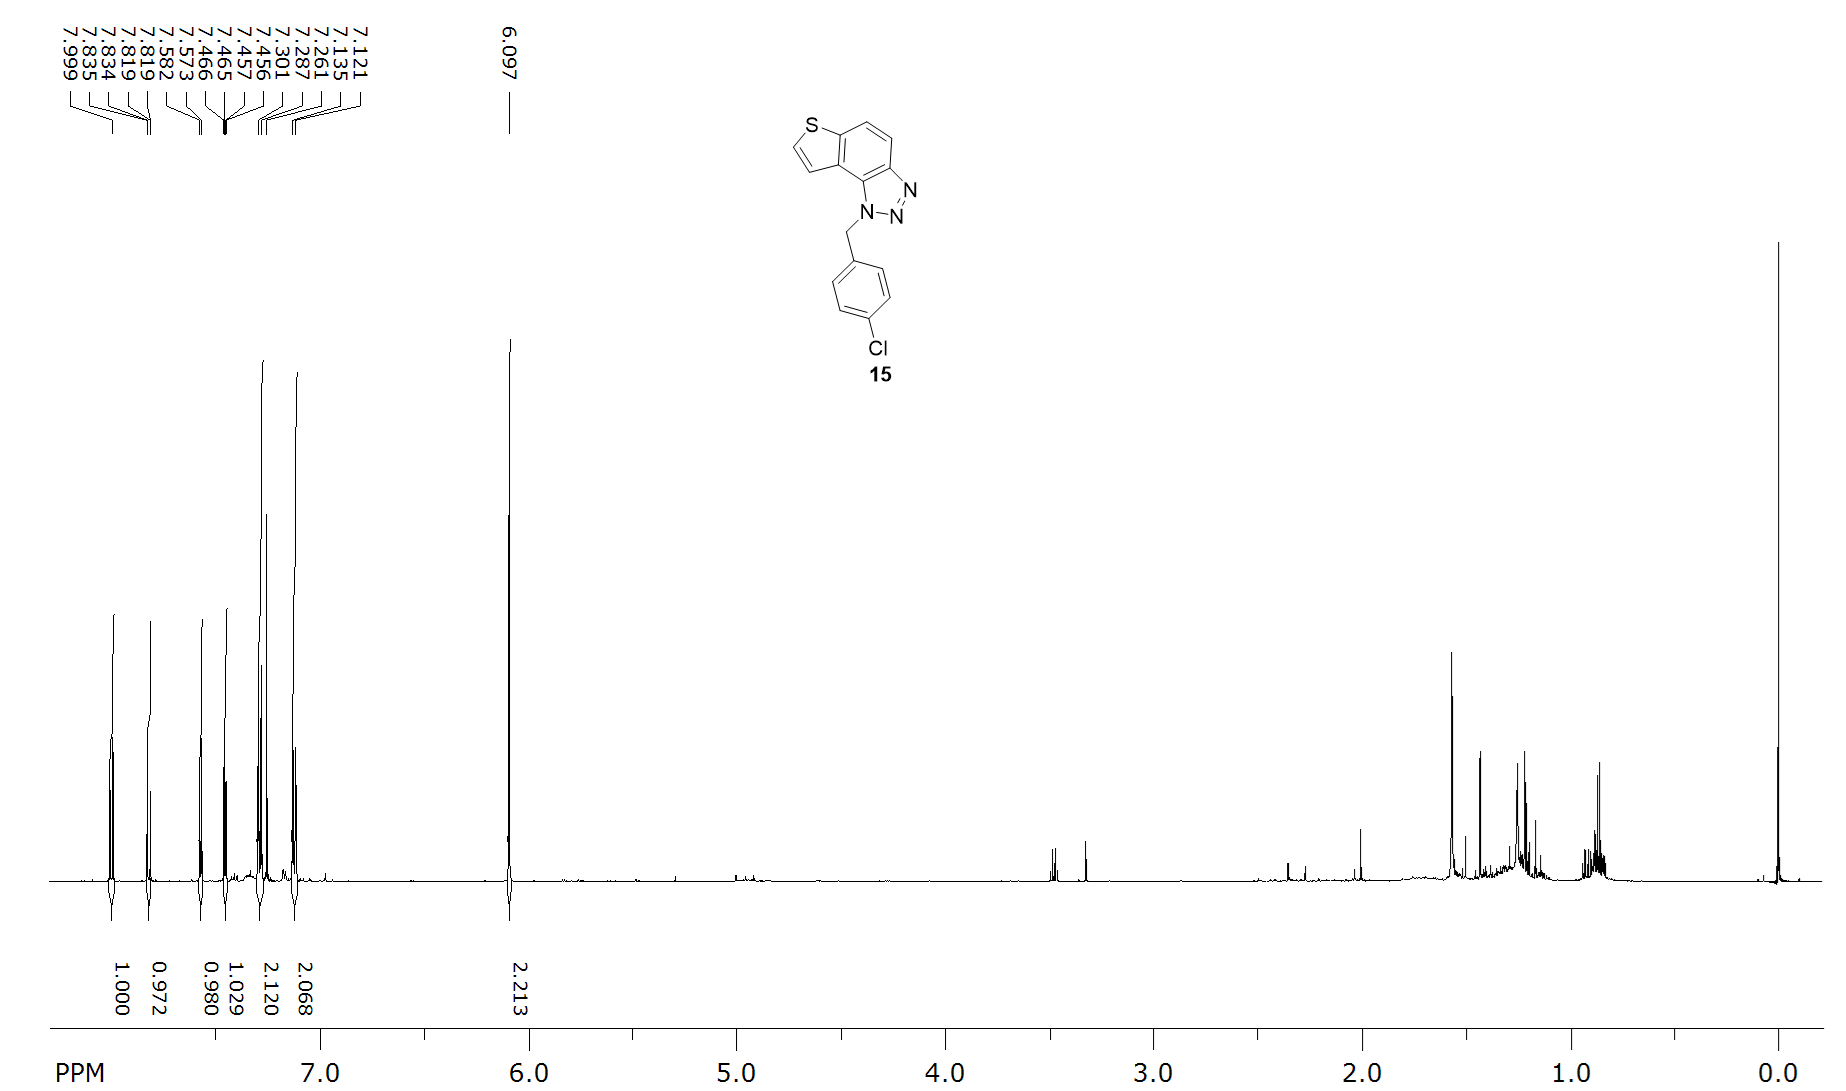


**Figure S31.** 1H NMR (CDCl3) spectrum of **15**.


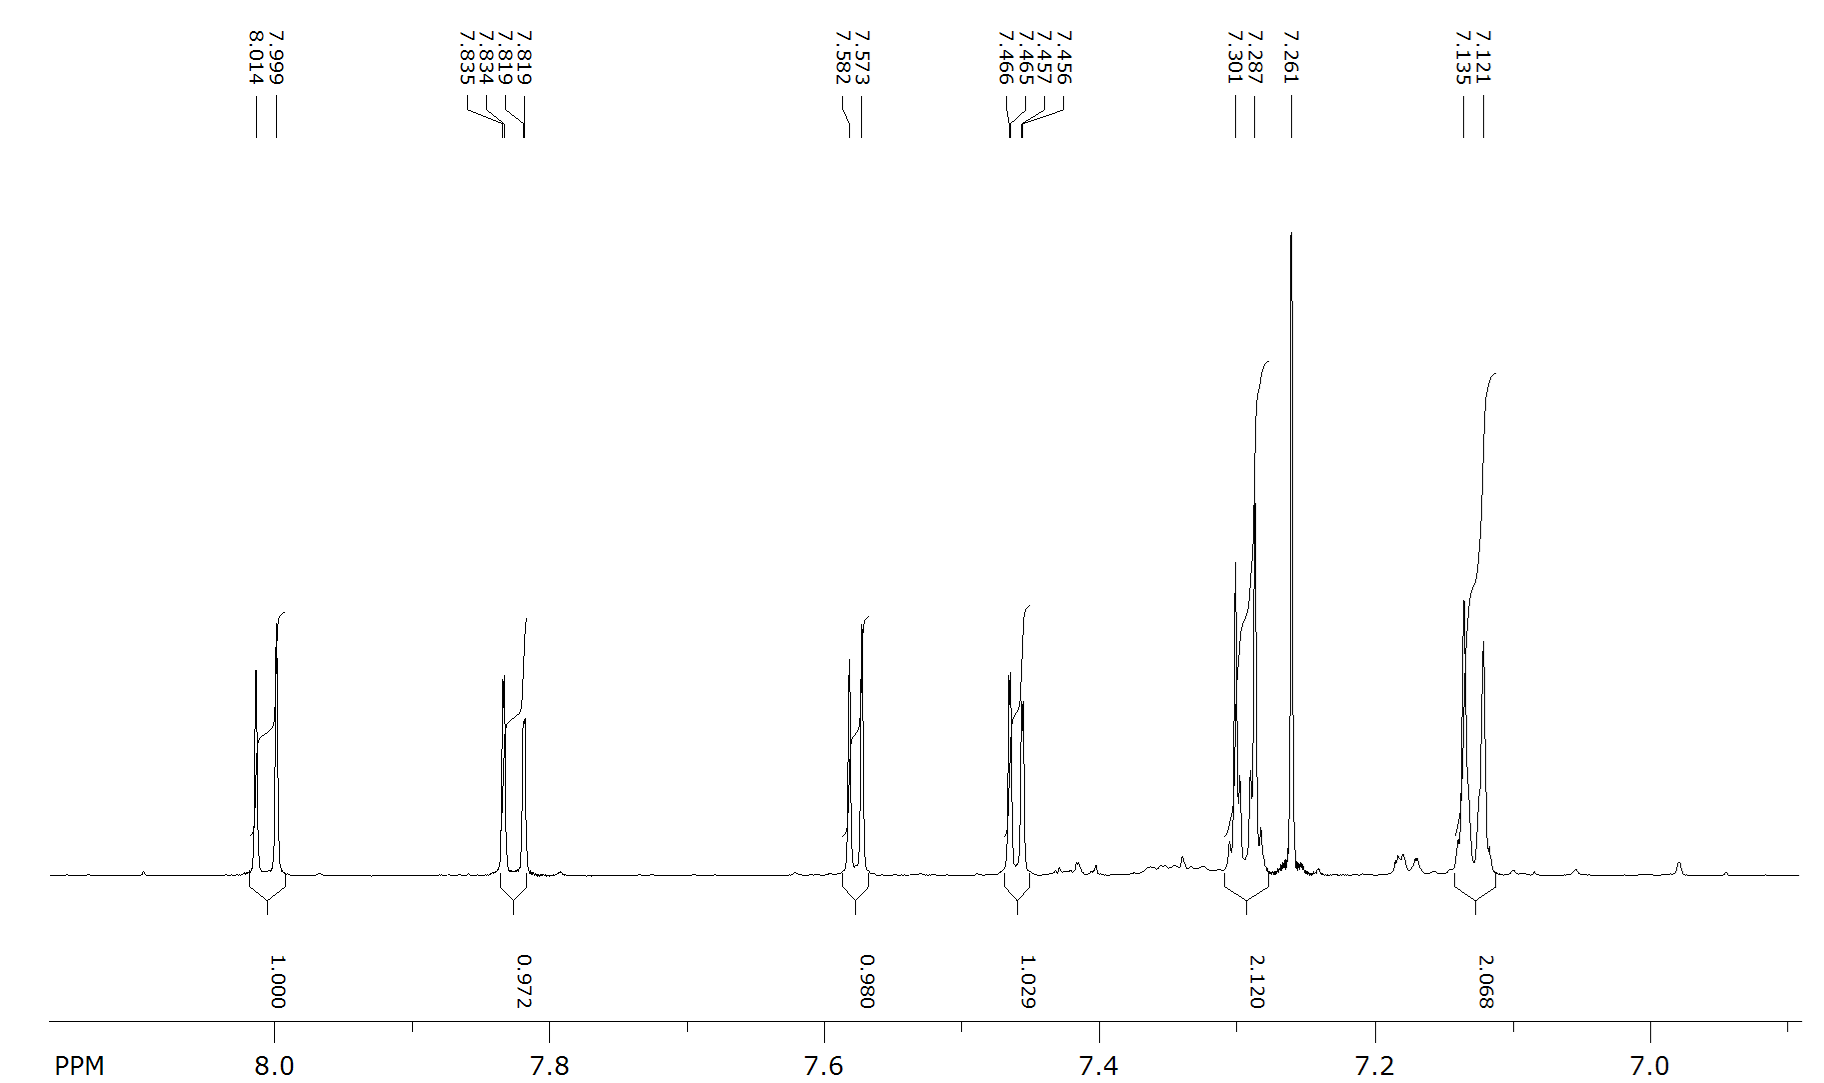


**Figure S32.** Aromatic part of the 1H NMR (CDCl3) spectrum of **15**.


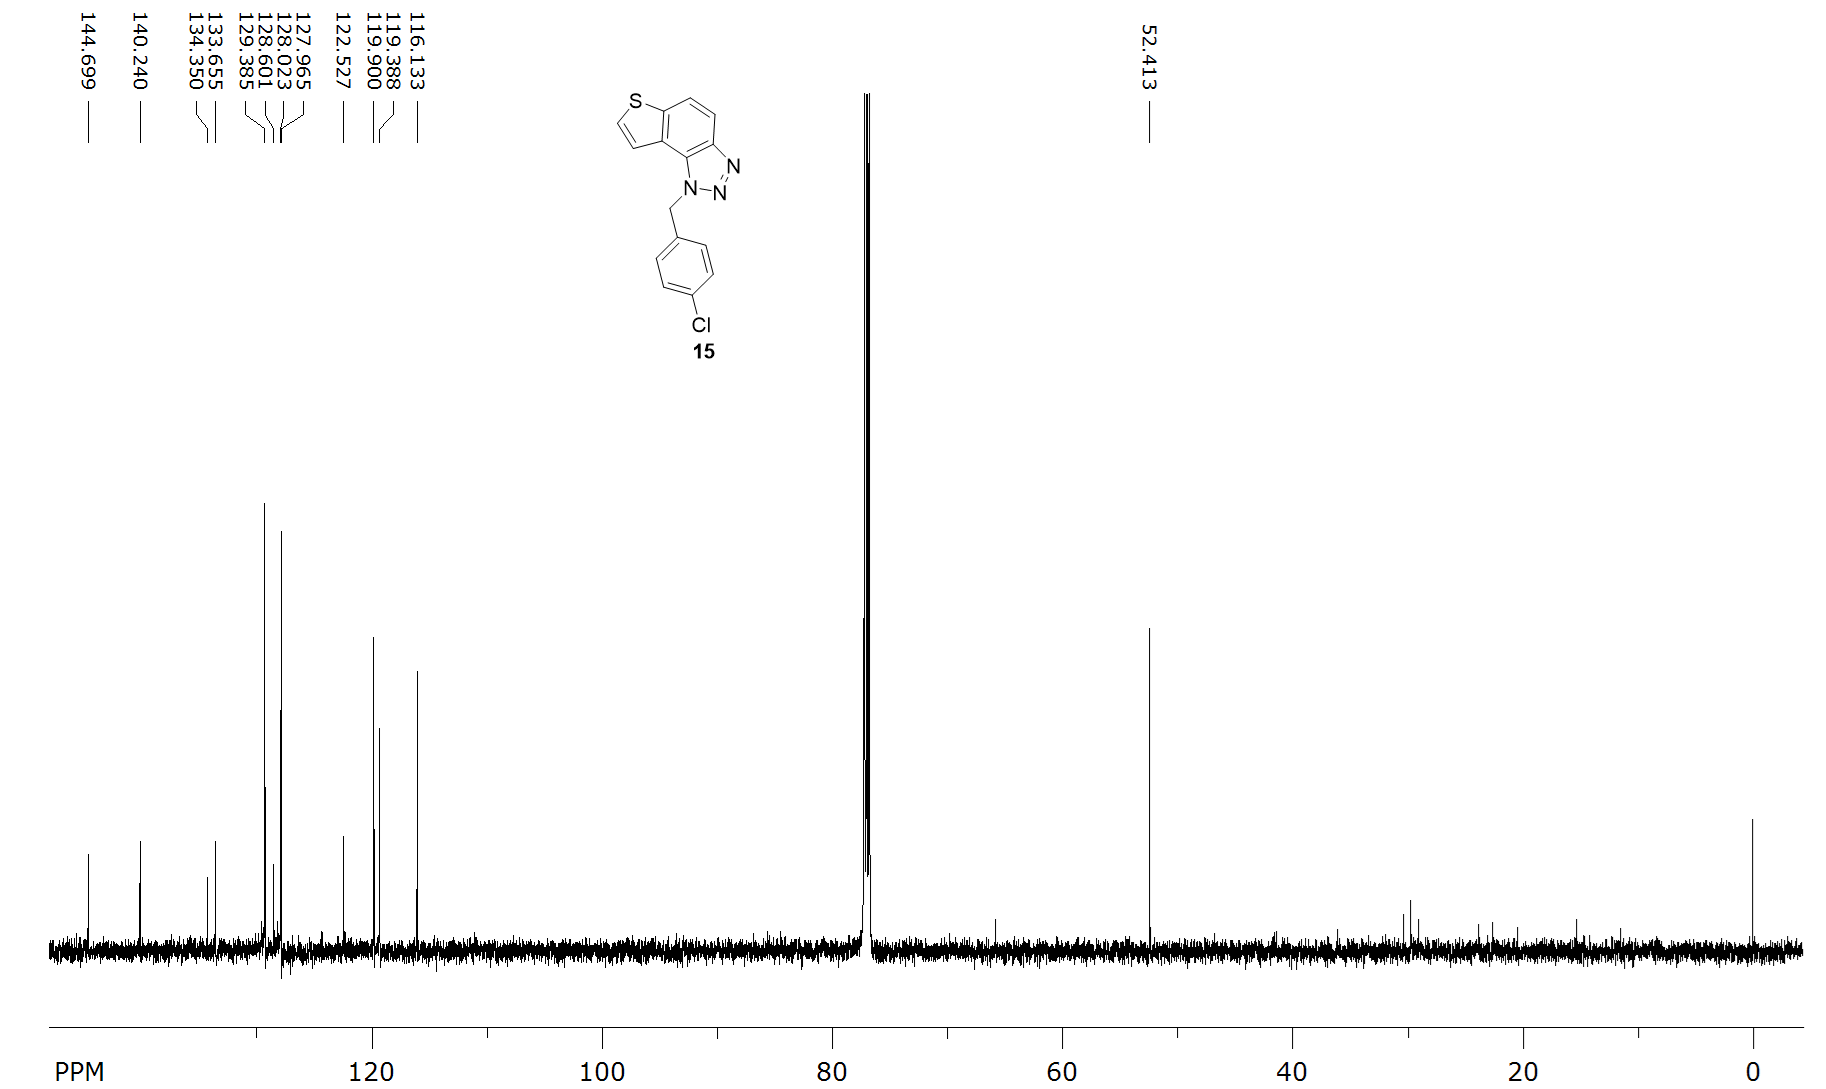


**Figure S33.** 13C NMR (CDCl3) spectrum of **15**.


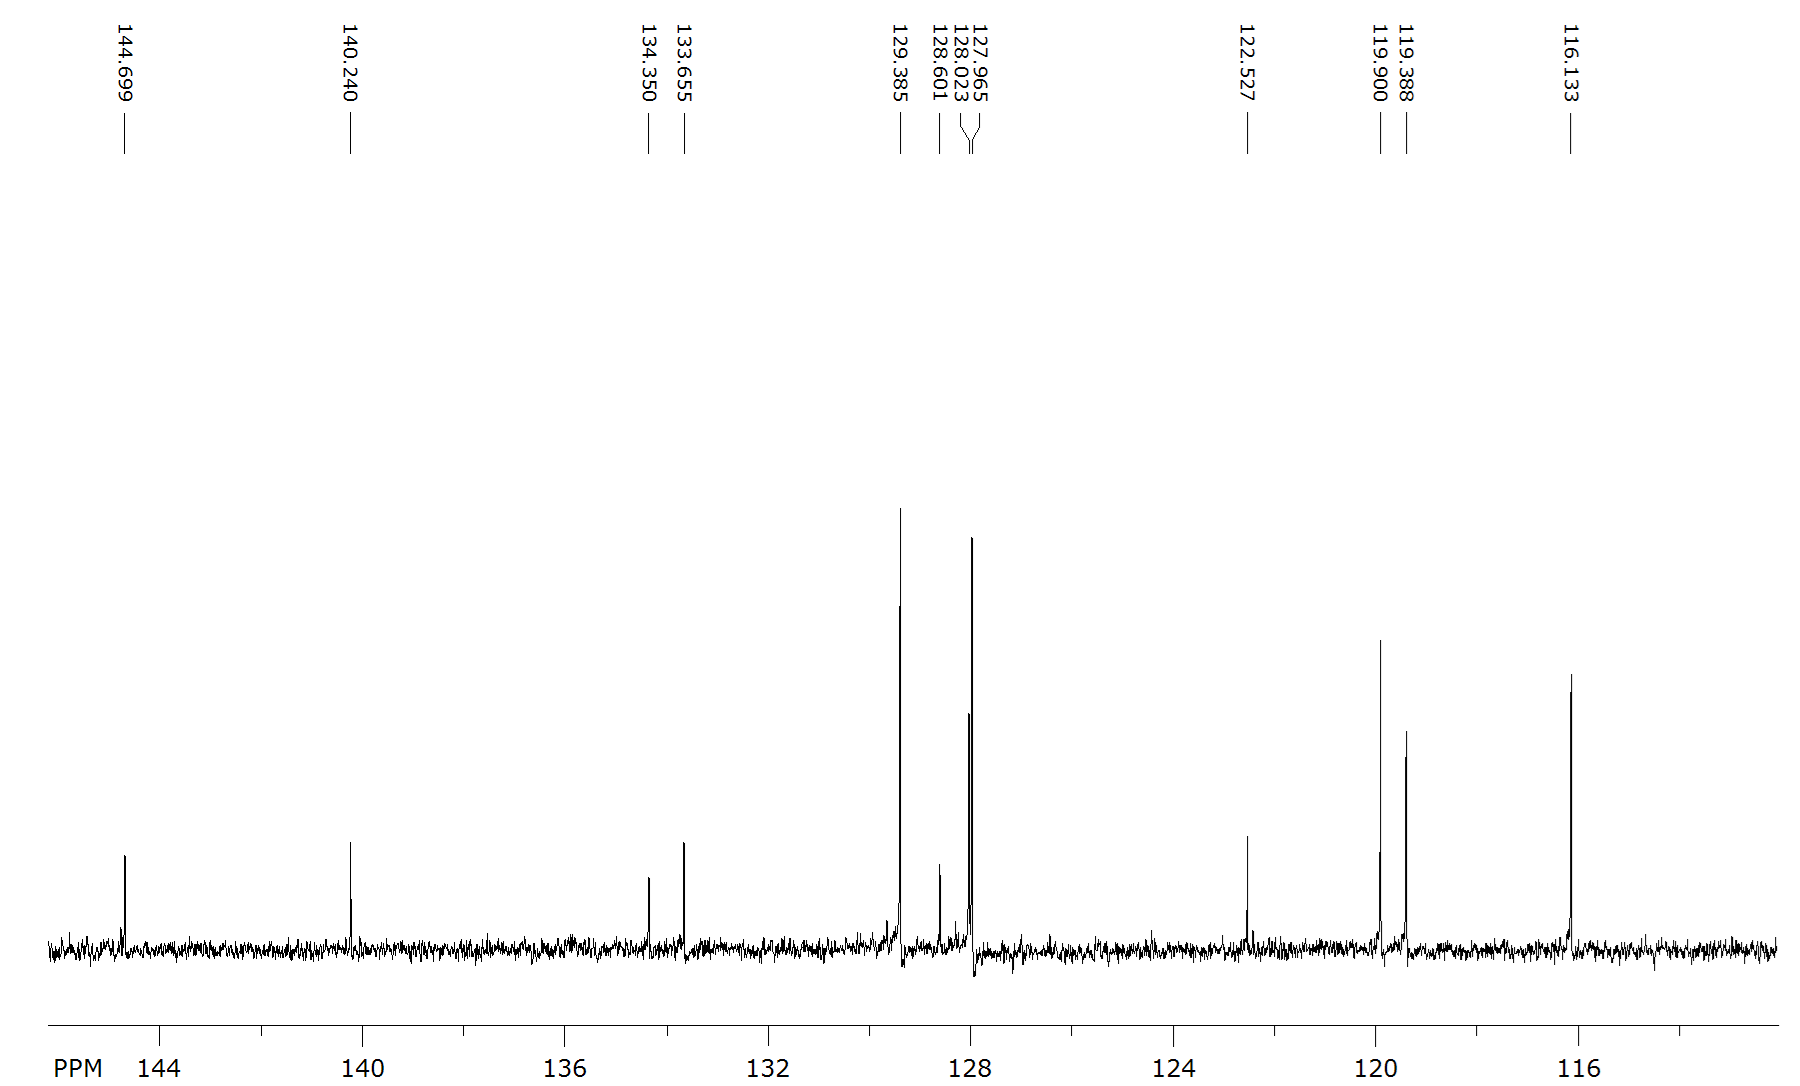


**Figure S34.** Aromatic part of the 13C NMR (CDCl3) spectrum of **15**.


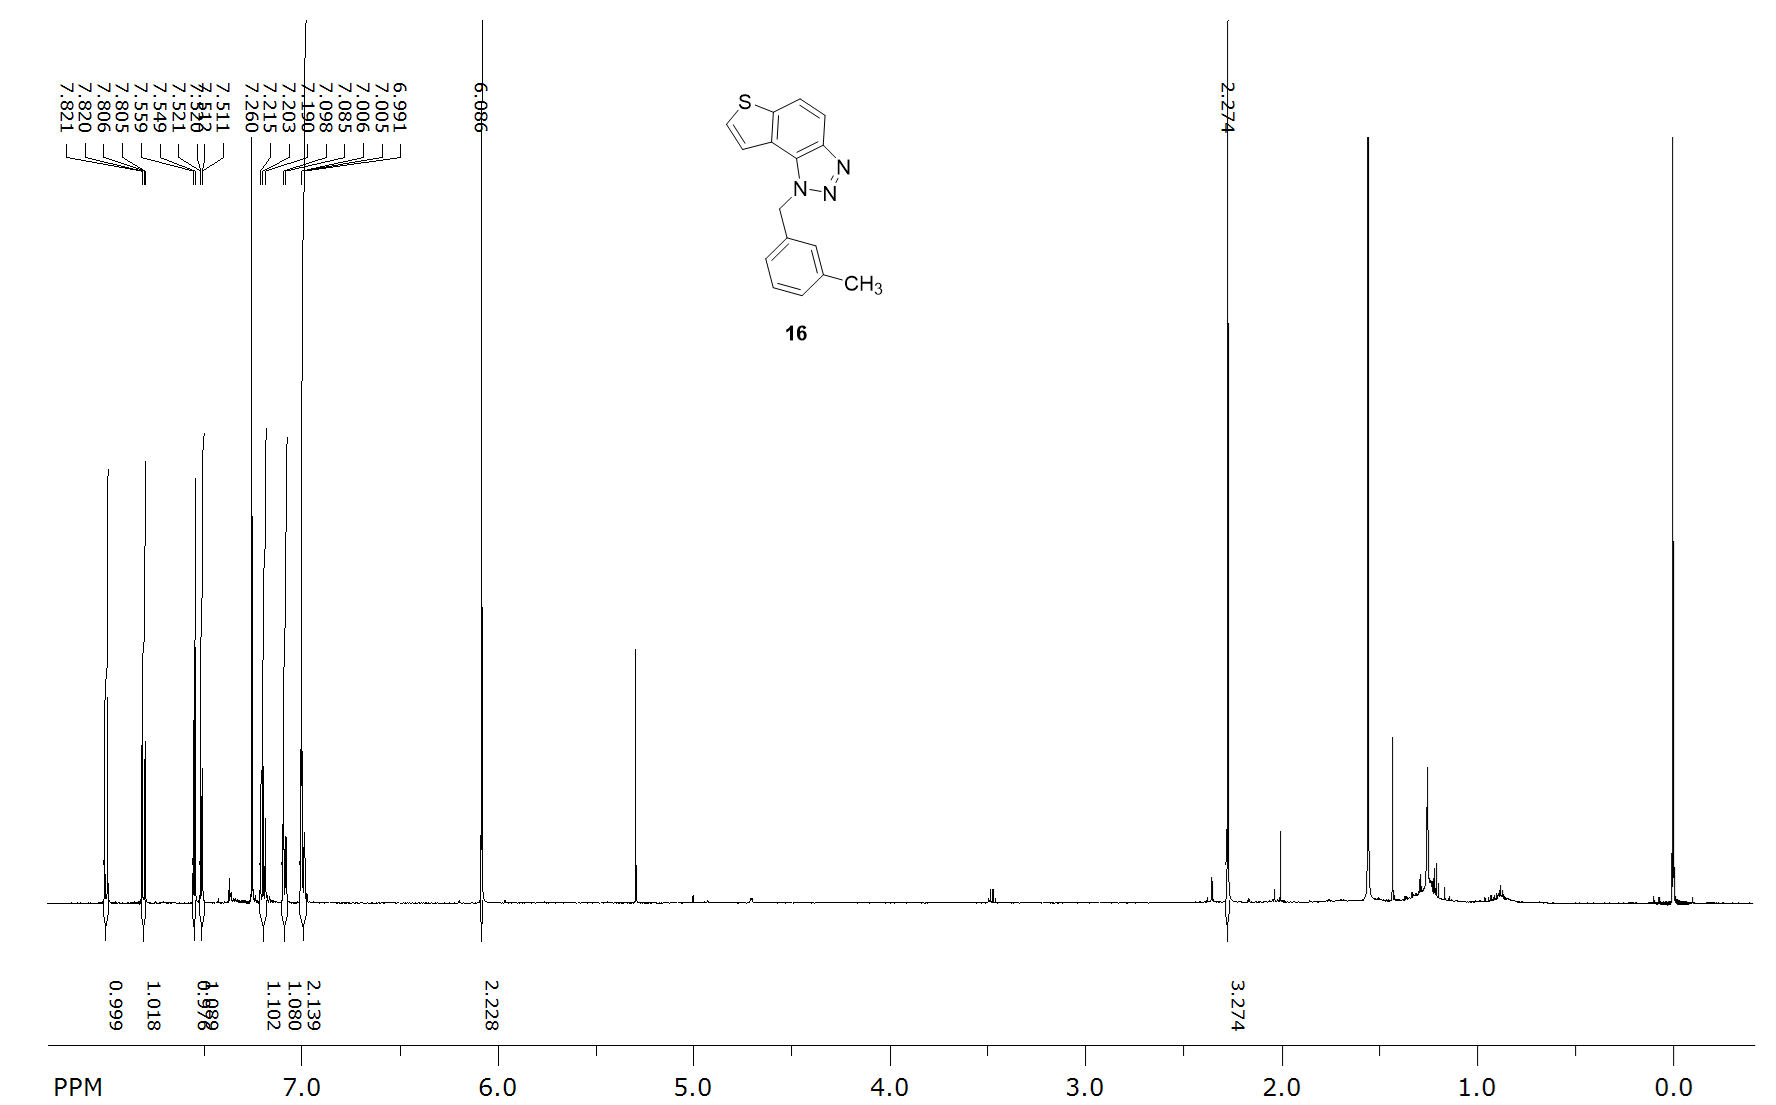


**Figure S35.** 1H NMR (CDCl3) spectrum of **16**.


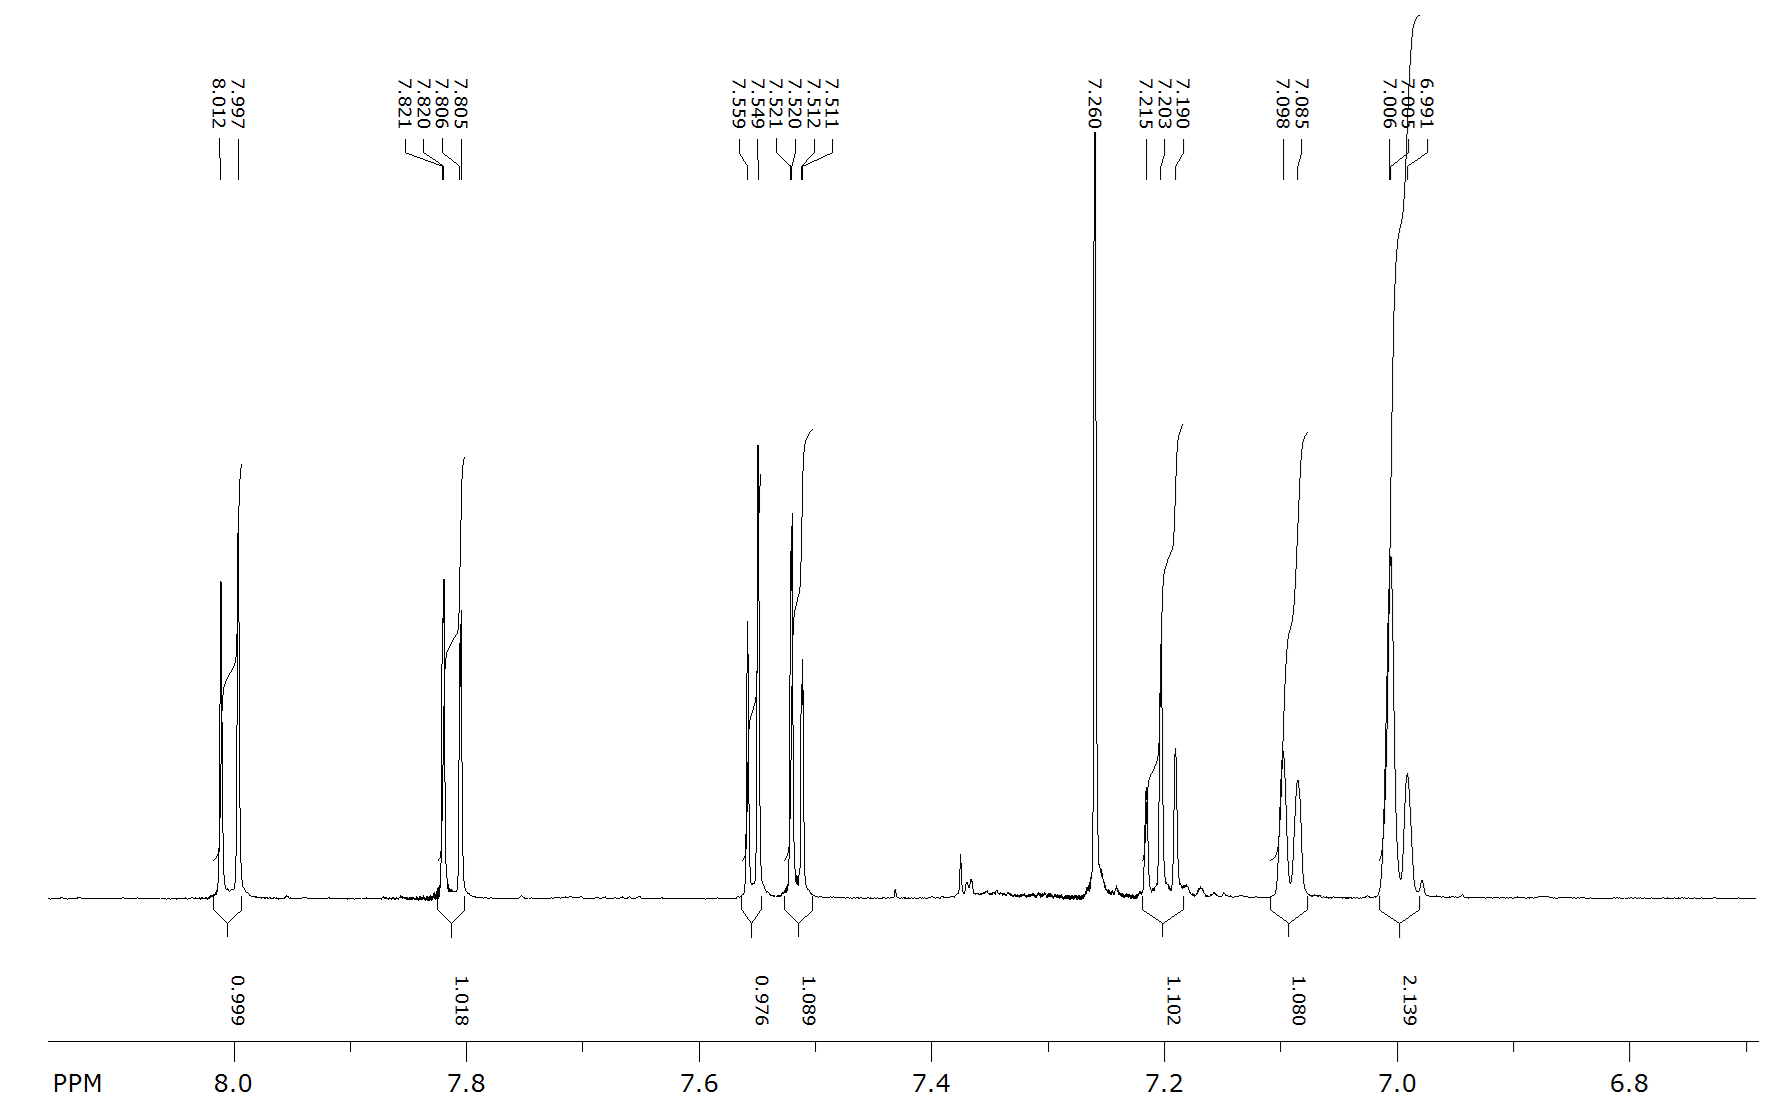


**Figure S36.** Aromatic part of the 1H NMR (CDCl3) spectrum of **16**.


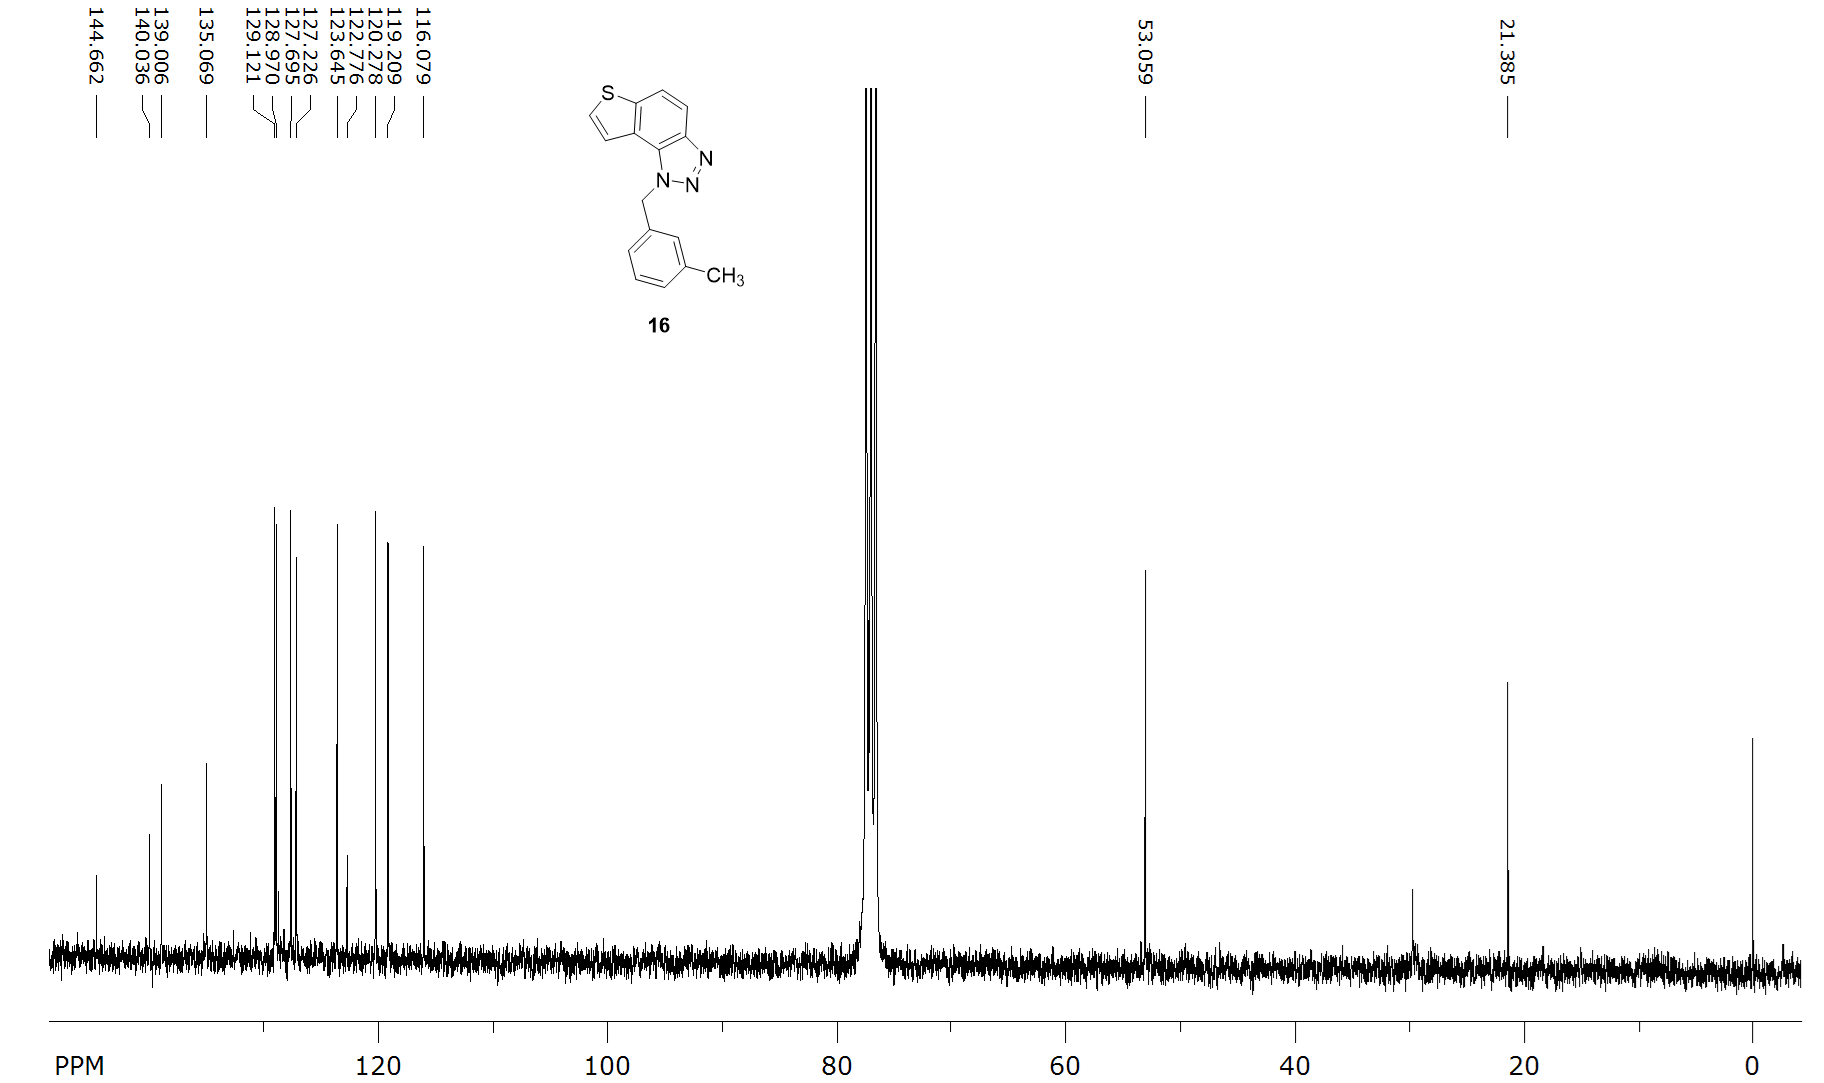


**Figure S37.** 13C NMR (CDCl3) spectrum of **16**.


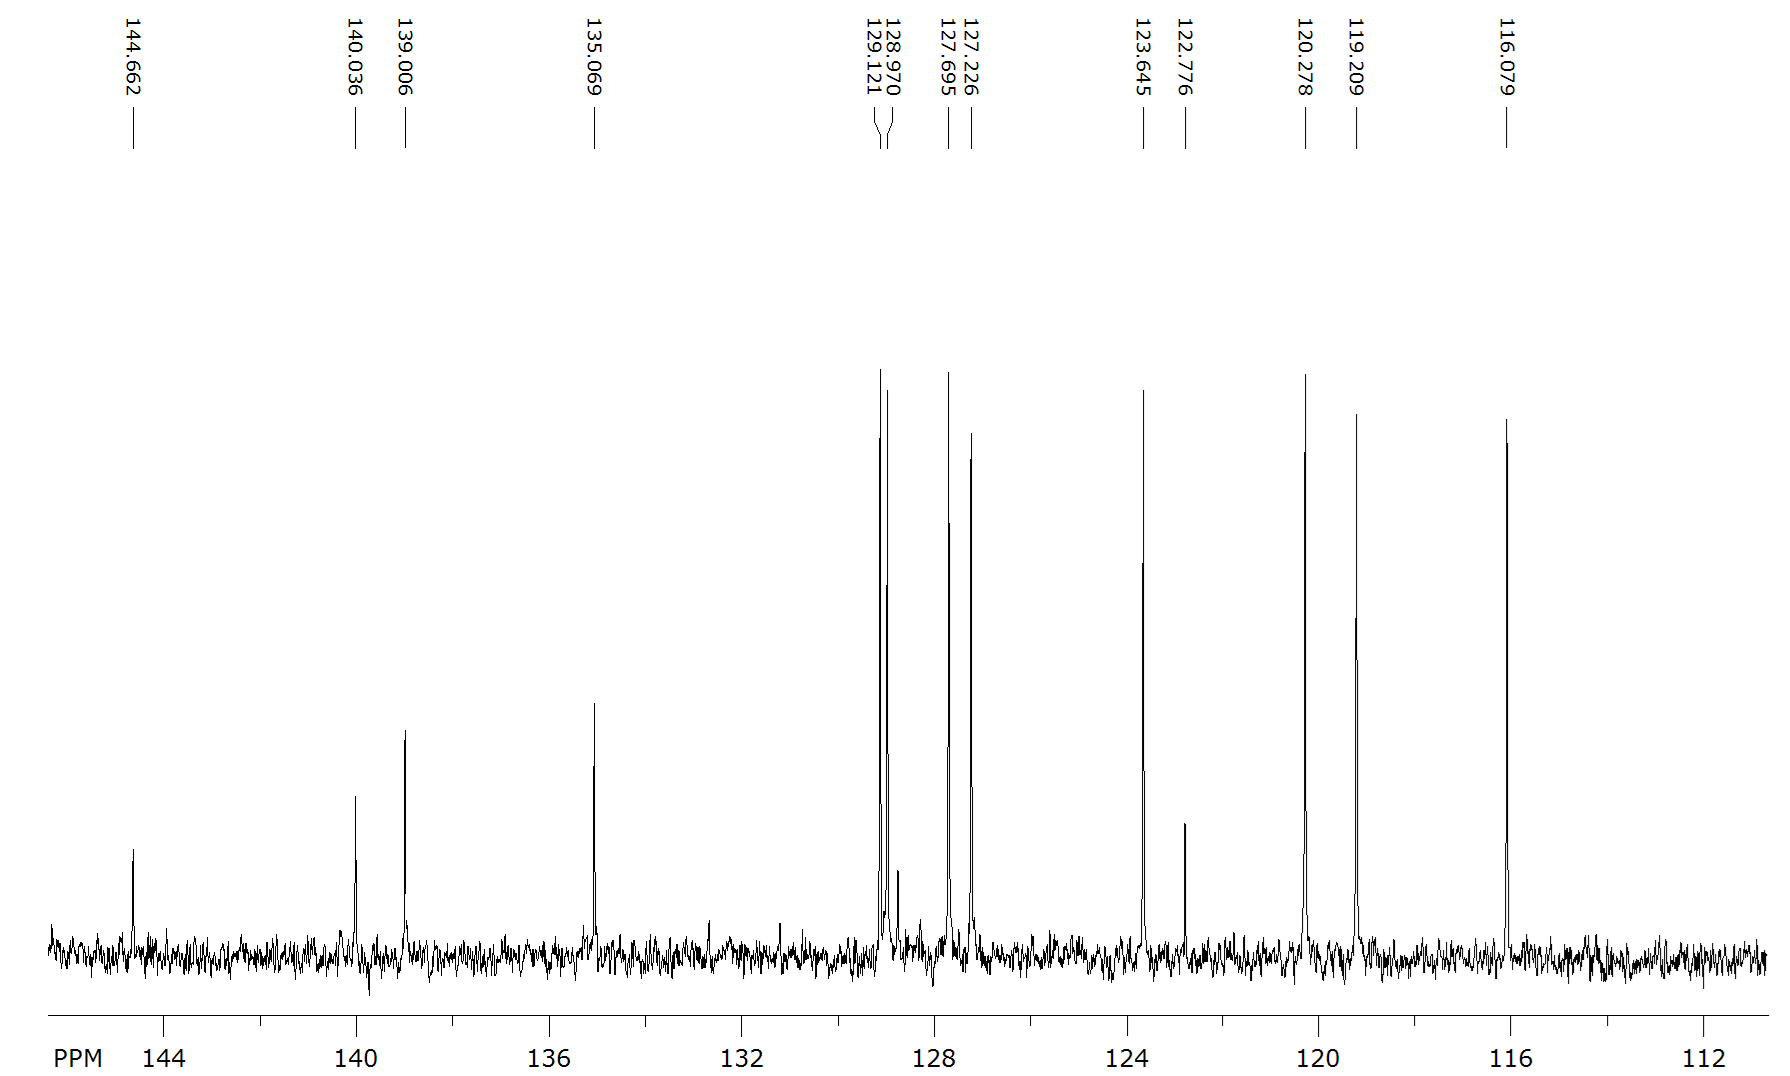


**Figure S38.** Aromatic part of the 13C NMR (CDCl3) spectrum of **16**.

**Figure S39.** 1H NMR (CDCl3) spectrum of **17**.

**Figure S40.** Aromatic part of the 1H NMR (CDCl3) spectrum of **17**.

**Figure S41.** 13C NMR (CDCl3) spectrum of **17**.

**Figure S42.** Aromatic part of the 13C NMR (CDCl3) spectrum of **17**.

**Figure S43.** 1H NMR (CDCl3) spectrum of **18**.

**Figure S44.** Aromatic part of the 1H NMR (CDCl3) spectrum of **18**.

**Figure S45.** 13C NMR (CDCl3) spectrum of **18**.

**Figure S46.** Aromatic part of the 13C NMR (CDCl3) spectrum of **18**.

**Figure S47.** 1H NMR (CDCl3) spectrum of **19**.

**Figure S48.** Aromatic part of the 1H NMR (CDCl3) spectrum of **19**.

**Figure S49.** 13C NMR (CDCl3) spectrum of **19**.

**Figure S50.** Aromatic part of the 13C NMR (CDCl3) spectrum of **19**.

**Figure S51.** 1H NMR (CDCl3) spectrum of **20**.

**Figure S52.** Aromatic part of the 1H NMR (CDCl3) spectrum of **20**.

**Figure S53.** 13C NMR (CDCl3) spectrum of **20**.

**Figure S54.** Aromatic part of the 13C NMR (CDCl3) spectrum of **20**.

**Figure S55.** 1H NMR (CDCl3) spectrum of **21**.

**Figure S56.** Aromatic part of the 1H NMR (CDCl3) spectrum of **21**.

**Figure S57.** 13C NMR (CDCl3) spectrum of **21**.

**Figure S58.** Aromatic part of the 13C NMR (CDCl3) spectrum of **21**.

**Figure S59.** 1H NMR (CDCl3) spectrum of **22**.

**Figure S60.** Aromatic part of the 1H NMR (CDCl3) spectrum of **22**.

**Figure S61.** 13C NMR (CDCl3) spectrum of **22**.

**Figure S62.** Aromatic part of the 13C NMR (CDCl3) spectrum of **22**.

**Figure S63.** 1H NMR (CDCl3) spectrum of **23**.

**Figure S64.** Part of the 1H NMR (CDCl3) spectrum of **23**.

**Figure S65.** 13C NMR (CDCl3) spectrum of **23**.

**Figure S66.** Part of the 13C NMR (CDCl3) spectrum of **23**.

**Figure S67.** 1H NMR (CDCl3) spectrum of **24**.

**Figure S68.** Part of the 1H NMR (CDCl3) spectrum of **24**.

**Figure S69.** 13C NMR (CDCl3) spectrum of **24**.

**Figure S70.** 1H NMR (CDCl3) spectrum of **25** (with traces of non-charged analogue **17**).

**Figure S71.** Part of the 1H NMR (CDCl3) spectrum of **25** (with traces of non-charged analogue **17**).

**Figure S72.** 1H NMR (CDCl3) spectrum of **26** (with traces of non-charged analogue **18**).

**Figure S73.** Part of the 1H NMR (CDCl3) spectrum of **26** (with traces of non-charged analogue **18**).

**Figure S74.** 13C NMR (CDCl3) spectrum of **26**.

**Figure S75.** 1H NMR (CDCl3) spectrum of **27** (with traces of non-charged analogue **19**).

**Figure S76.** Part of the 1H NMR (CDCl3) spectrum of **27** (with traces of non-charged analogue **19**).

**Figure S77.** 1H NMR (CDCl3) spectrum of **28** (with certain proportion of non-charged analogue **20**).

**Figure S78.** Part of the1H NMR (CDCl3) spectrum of **28** (with certain proportion of non-charged analogue **20**).

**Figure S79.** 1H NMR (CDCl3) spectrum of **30**.

**Figure S80.** Aromatic part of the1H NMR (CDCl3) spectrum of **30.**

**2. Mass spectra and HRMS analyses of compounds 1–31**

**Figure S81.** Mass spectrum and HRMS analysis of compound **7**.

**Figure S82.** Mass spectrum and HRMS analysis of compound **9**.

**Figure S83.** Mass spectrum and HRMS analysis of compound **10**.

**Figure S84.** Mass spectrum and HRMS analysis of compound **11**.

**Figure S85.** Mass spectrum and HRMS analysis of compound **12**.

**Figure S86.** Mass spectrum and HRMS analysis of compound **14**.

**Figure S87.** Mass spectrum and HRMS analysis of compound **15**.

**Figure S88.** Mass spectrum and HRMS analysis of compound **16**.

**Figure S89.** Mass spectrum and HRMS analysis of compound **17**.

**Figure S90.** Mass spectrum and HRMS analysis of compound **18**.

**Figure S91.** Mass spectrum and HRMS analysis of compound **19**.

**Figure S92.** Mass spectrum and HRMS analysis of compound **20**.

**Figure S93.** Mass spectrum and HRMS analysis of compound **21**.

**Figure S94.** Mass spectrum and HRMS analysis of compound **22**.

**Figure S95.** Mass spectrum and HRMS analysis of compound **23**.

**Figure S96.** Mass spectrum and HRMS analysis of compound **24**.

**Figure S97.** Mass spectrum of compound **25**.

**Figure S98.** Mass spectrum of compound **26**.

**Figure S99.** Mass spectrum of compound **27**.

**Figure S100.** Mass spectrum and HRMS analysis of compound **30**.

**Figure S101.** Mass spectrum and HRMS analysis of compound **31**.

**3. Cartesian coordinates of docked ligands**

Molecule 14 docked into the AChE

C -13.573000 -45.130000 26.839000

H -14.545000 -45.370000 26.376000

C -13.199000 -43.793000 27.016000

C -11.965000 -43.515000 27.610000

H -11.654000 -42.467000 27.758000

C -11.121000 -44.550000 28.018000

H -10.154000 -44.308000 28.489000

C -11.484000 -45.889000 27.838000

C -12.726000 -46.159000 27.243000

H -13.037000 -47.206000 27.092000

C -10.562000 -47.013000 28.248000

H -9.575000 -46.798000 28.721000

H -10.387000 -47.661000 27.358000

H -11.128000 -47.699000 28.921000

C -14.133000 -42.659000 26.630000

H -14.816000 -42.413000 27.476000

H -13.570000 -41.700000 26.555000

N -14.897000 -42.897000 25.412000

N -14.227000 -43.254000 24.271000

N -15.079000 -43.426000 23.314000

C -16.342000 -43.187000 23.805000

C -17.590000 -43.269000 23.149000

H -17.652000 -43.545000 22.083000

C -16.239000 -42.837000 25.165000

C -18.728000 -42.995000 23.877000

H -19.720000 -43.055000 23.399000

C -18.616000 -42.635000 25.244000

S -19.955000 -42.248000 26.307000

C -17.387000 -42.534000 25.937000

C -18.866000 -41.953000 27.638000

H -19.202000 -41.648000 28.643000

C -17.559000 -42.138000 27.307000

H -16.723000 -41.999000 28.013000

Molecule 15 docked into the AChE

S -19.956000 -42.346000 26.333000

C -18.619000 -42.675000 25.250000

C -17.385000 -42.529000 25.925000

C -17.553000 -42.144000 27.300000

H -16.713000 -41.974000 27.995000

C -18.860000 -42.013000 27.650000

H -19.193000 -41.726000 28.661000

C -16.237000 -42.779000 25.134000

C -16.345000 -43.129000 23.776000

C -17.598000 -43.259000 23.137000

H -17.665000 -43.534000 22.071000

C -18.735000 -43.033000 23.883000

H -19.731000 -43.130000 23.418000

N -15.080000 -43.312000 23.265000

N -14.221000 -43.107000 24.208000

N -14.889000 -42.784000 25.363000

C -14.117000 -42.510000 26.565000

H -14.792000 -42.227000 27.406000

H -13.545000 -41.560000 26.453000

C -13.192000 -43.640000 26.984000

C -11.962000 -43.354000 27.586000

H -11.653000 -42.303000 27.716000

C -11.120000 -44.376000 28.024000

H -10.154000 -44.140000 28.500000

C -11.518000 -45.700000 27.851000

Cl -10.463000 -46.998000 28.391000

C -12.740000 -46.010000 27.254000

H -13.044000 -47.062000 27.122000

C -13.572000 -44.978000 26.826000

H -14.541000 -45.218000 26.357000

Cation 22 docked into the AChE

N -14.696000 -44.324000 26.860000

C -14.020000 -44.748000 27.983000

C -14.775000 -44.261000 29.064000

N -15.826000 -43.595000 28.483000

N -15.775000 -43.635000 27.166000

C -14.425000 -44.478000 30.413000

H -15.036000 -44.085000 31.243000

C -13.275000 -45.209000 30.638000

H -12.950000 -45.410000 31.673000

C -12.509000 -45.704000 29.554000

C -12.839000 -45.501000 28.191000

S -11.044000 -46.638000 29.699000

C -10.894000 -46.742000 27.973000

H -10.068000 -47.270000 27.468000

C -11.897000 -46.107000 27.301000

H -11.973000 -46.066000 26.201000

C -16.928000 -42.889000 29.138000

H -16.971000 -42.855000 30.252000

H -17.892000 -43.300000 28.756000

H -16.964000 -41.845000 28.748000

C -14.325000 -44.569000 25.429000

H -14.613000 -45.601000 25.121000

H -13.218000 -44.642000 25.318000

C -14.886000 -43.556000 24.472000

C -14.344000 -42.267000 24.403000

H -13.490000 -41.995000 25.046000

C -14.878000 -41.326000 23.526000

H -14.437000 -40.316000 23.480000

C -15.967000 -41.641000 22.700000

C -16.502000 -42.935000 22.777000

H -17.355000 -43.208000 22.134000

C -16.567000 -40.607000 21.780000

H -16.142000 -39.578000 21.719000

H -17.653000 -40.520000 22.018000

H -16.593000 -41.033000 20.750000

C -15.974000 -43.881000 23.652000

H -16.415000 -44.891000 23.700000

Cation 23 docked into the AChE

N -14.622000 -44.354000 26.920000

C -13.945000 -44.767000 28.046000

C -14.699000 -44.267000 29.122000

N -15.750000 -43.606000 28.535000

N -15.700000 -43.660000 27.218000

C -14.348000 -44.469000 30.474000

H -14.958000 -44.066000 31.300000

C -13.200000 -45.199000 30.706000

H -12.875000 -45.389000 31.743000

C -12.434000 -45.707000 29.628000

C -12.764000 -45.519000 28.262000

S -10.970000 -46.640000 29.783000

C -10.821000 -46.764000 28.058000

H -9.996000 -47.300000 27.559000

C -11.823000 -46.135000 27.378000

H -11.898000 -46.105000 26.278000

C -16.851000 -42.892000 29.183000

H -16.893000 -42.846000 30.296000

H -17.815000 -43.306000 28.806000

H -16.887000 -41.852000 28.782000

C -14.253000 -44.613000 25.492000

H -14.534000 -45.650000 25.196000

H -13.146000 -44.680000 25.378000

C -14.825000 -43.613000 24.527000

C -14.346000 -42.297000 24.504000

H -13.537000 -41.999000 25.192000

C -14.880000 -41.362000 23.622000

H -14.497000 -40.328000 23.605000

C -15.907000 -41.750000 22.758000

C -16.404000 -43.055000 22.771000

H -17.217000 -43.350000 22.087000

Cl -16.585000 -40.583000 21.650000

C -15.860000 -43.980000 23.659000

H -16.249000 -45.012000 23.678000

Molecule 14 docked into the BChE

C -18.671000 -14.597000 44.662000

H -19.250000 -15.073000 43.853000

C -18.472000 -13.212000 44.651000

C -17.741000 -12.631000 45.691000

H -17.575000 -11.541000 45.699000

C -17.218000 -13.418000 46.720000

H -16.647000 -12.939000 47.534000

C -17.407000 -14.804000 46.734000

C -18.144000 -15.378000 45.687000

H -18.309000 -16.469000 45.676000

C -16.817000 -15.664000 47.827000

H -16.968000 -16.769000 47.838000

H -17.161000 -15.259000 48.807000

H -15.721000 -15.465000 47.868000

C -19.085000 -12.339000 43.569000

H -19.983000 -11.807000 43.961000

H -19.564000 -12.970000 42.785000

N -18.158000 -11.392000 42.963000

N -16.820000 -11.689000 42.957000

N -16.175000 -10.733000 42.371000

C -17.080000 -9.776000 41.973000

C -16.859000 -8.566000 41.278000

H -15.841000 -8.259000 40.984000

C -18.371000 -10.187000 42.356000

C -17.950000 -7.779000 40.977000

H -17.815000 -6.830000 40.431000

C -19.246000 -8.195000 41.373000

S -20.732000 -7.314000 41.079000

C -19.511000 -9.394000 42.075000

C -21.669000 -8.540000 41.894000

H -22.764000 -8.490000 42.015000

C -20.907000 -9.565000 42.365000

H -21.317000 -10.432000 42.910000

Molecule 15 docked into the BChE

S -20.706000 -7.362000 41.075000

C -19.226000 -8.238000 41.411000

C -19.513000 -9.478000 42.029000

C -20.922000 -9.682000 42.224000

H -21.351000 -10.583000 42.695000

C -21.669000 -8.643000 41.764000

H -22.770000 -8.613000 41.821000

C -18.378000 -10.267000 42.339000

C -17.075000 -9.820000 42.056000

C -16.832000 -8.571000 41.442000

H -15.803000 -8.236000 41.227000

C -17.916000 -7.783000 41.119000

H -17.765000 -6.803000 40.636000

N -16.180000 -10.785000 42.460000

N -16.840000 -11.778000 42.955000

N -18.183000 -11.501000 42.894000

C -19.125000 -12.487000 43.399000

H -20.097000 -12.003000 43.652000

H -19.458000 -13.164000 42.578000

C -18.611000 -13.295000 44.579000

C -17.929000 -12.659000 45.621000

H -17.733000 -11.575000 45.559000

C -17.492000 -13.373000 46.738000

H -16.957000 -12.862000 47.556000

C -17.742000 -14.742000 46.803000

Cl -17.191000 -15.656000 48.200000

C -18.421000 -15.399000 45.776000

H -18.613000 -16.483000 45.839000

C -18.854000 -14.671000 44.670000

H -19.394000 -15.184000 43.857000

Cation 22 docked into BChE

N -18.171000 -11.585000 42.584000

C -18.879000 -10.445000 42.275000

C -17.902000 -9.496000 41.926000

N -16.708000 -10.161000 42.062000

N -16.873000 -11.409000 42.456000

C -18.208000 -8.176000 41.537000

H -17.421000 -7.451000 41.268000

C -19.547000 -7.840000 41.511000

H -19.848000 -6.821000 41.216000

C -20.538000 -8.789000 41.859000

C -20.257000 -10.121000 42.254000

S -22.257000 -8.495000 41.867000

C -22.571000 -10.122000 42.387000

H -23.586000 -10.514000 42.567000

C -21.441000 -10.868000 42.551000

H -21.440000 -11.923000 42.874000

C -15.354000 -9.655000 41.828000

H -15.215000 -8.600000 41.495000

H -14.842000 -10.329000 41.102000

H -14.747000 -9.822000 42.748000

C -18.724000 -12.907000 43.023000

H -19.824000 -12.949000 42.848000

H -18.393000 -13.719000 42.334000

C -18.402000 -13.260000 44.448000

C -18.693000 -14.535000 44.947000

H -19.150000 -15.291000 44.287000

C -18.408000 -14.853000 46.272000

H -18.639000 -15.864000 46.649000

C -17.832000 -13.909000 47.136000

C -17.545000 -12.635000 46.625000

H -17.088000 -11.877000 47.283000

C -17.562000 -14.245000 48.582000

H -17.104000 -13.495000 49.268000

H -16.939000 -15.169000 48.613000

H -18.515000 -14.598000 49.040000

C -17.827000 -12.310000 45.301000

H -17.597000 -11.300000 44.922000

Cation 23 docked into BChE

N -18.070000 -11.470000 41.949000

C -18.889000 -10.366000 41.868000

C -18.045000 -9.322000 41.449000

N -16.807000 -9.905000 41.323000

N -16.827000 -11.188000 41.622000

C -18.492000 -8.001000 41.239000

H -17.808000 -7.200000 40.911000

C -19.833000 -7.765000 41.467000

H -20.241000 -6.751000 41.319000

C -20.692000 -8.810000 41.889000

C -20.268000 -10.146000 42.107000

S -22.396000 -8.647000 42.211000

C -22.519000 -10.329000 42.624000

H -23.463000 -10.809000 42.933000

C -21.335000 -11.000000 42.529000

H -21.215000 -12.074000 42.751000

C -15.548000 -9.281000 40.913000

H -14.544000 -9.754000 40.811000

H -15.404000 -8.415000 41.601000

H -15.757000 -8.803000 39.928000

C -18.456000 -12.860000 42.351000

H -17.926000 -13.612000 41.721000

H -19.509000 -13.076000 42.055000

C -18.246000 -13.149000 43.811000

C -17.637000 -12.199000 44.641000

H -17.320000 -11.230000 44.220000

C -17.427000 -12.465000 45.991000

H -16.950000 -11.712000 46.641000

C -17.828000 -13.698000 46.512000

C -18.429000 -14.662000 45.700000

H -18.738000 -15.633000 46.122000

Cl -17.566000 -14.042000 48.203000

C -18.633000 -14.382000 44.351000

H -19.104000 -15.139000 43.701000

**Table S1.** Free energy of binding, *G*bind, estimated by molecular docking of compounds **14**, **15**, **22** and **23** into the active site of AChE (4EY7.pdb), along with the number of conformational clusters, distribution of conformations, and docking results of the reference compound donepezil and galantamine.

| Ligand | *G*bind/kcal mol−1  lowest highest | | Number of distinctive conformational clusters | Distribution of conformations within clusters with *n* > 1 (*n* = cluster population) |
| --- | --- | --- | --- | --- |
| **14** | −9.50 | −9.33 | 1 | 25 |
| **15** | −9.49 | −9.21 | 1 | 25 |
| **22** | −9.32 | −8.53 | 5 | 7, 2, 4, 7, 5 |
| **23** | −9.46 | −8.70 | 4 | 8, 3, 10, 4 |
| Donepezil | −11.37 | −10.75 | 4 | 22 |
| Galantamine | −10.11 | −10.10 | 1 | 25 |

**Table S2.** Free energies of binding, *G*bind, obtained by molecular docking of listed molecules into the active site of BChE (7AIY.pdb), along with the number of conformational clusters, distribution of conformations, and docking results of the reference compounds donepezil and galantamine.

| Ligand | *G*bind/kcal mol−1  lowest highest | | Number of distinctive conformational clusters | Distribution of conformations within clusters with *n* > 1 (*n* = cluster population) |
| --- | --- | --- | --- | --- |
| **14** | −8.63 | −8.52 | 1 | 25 |
| **15** | −8.54 | −8.40 | 1 | 24 |
| **22** | −7.79 | −7.45 | 5 | 5, 2, 9, 3, 5 |
| **23** | −7.89 | −7.49 | 4 | 2, 8, 4, 9 |
| Donepezil | −9.77 | −8.16 | 4 | 2, 5, 15, 3 |
| Galantamine | −7.32 | −7.15 | 1 | 25 |
